# Supplementary material for: Monoclonal Antibody for the Prevention of Respiratory Syncytial Virus in Infants and Children: A Systematic Review and Network Meta-analysis
Source: PubMed Central journal article supplement (PMC9938429; doi:10.1001/jamanetworkopen.2023.0023), 2023-02-17
Supplement: jamanetwopen-e230023-s001.pdf [file jamanetwopen-e230023-s001.pdf]

## Supplementary Online Content

Sun M, Lai H, Na F, et al. Monoclonal antibody for the prevention of respiratory syncytial virus in infants and children: a systematic review and network meta-analysis. *JAMA Netw Open*. 2023;6(2):e230023. doi:10.1001/jamanetworkopen.2023.0023

### **eMethods.**

### **eResults.**

**eTable 1.** Detailed Search Strategy

**eTable 2.** Excluded Studies List

**eTable 3.** Baseline Characteristics of Included Trials

**eTable 4.** Baseline Characteristics of Included Trials

**eTable 5.** Risk of Bias Assessment in Dichotomous Outcomes

**eTable 6.** Risk of Bias Assessment in Continuous Outcomes

**eTable 7.** League Table of All-Cause Mortality in Fixed-effect Model

**eTable 8.** League Table of All-Cause Mortality in Random-effects Model

**eTable 9.** League Table of Rate of RSV Infection in Fixed-effect Model

**eTable 10.** League Table of Rate of RSV Infection in Random-effects Model

**eTable 11.** League Table of RSV-Related Hospitalization in Fixed-effect Model

**eTable 12.** League Table of RSV-Related Hospitalization in Random-effects Model

**eTable 13.** League Table of Rate of ICU Admission in Fixed-effect Model

**eTable 14.** League Table of Rate of ICU Admission in Random-effects Model

**eTable 15.** League Table of Rate of Mechanical Ventilation Use in Fixed-effect Model

**eTable 16.** League Table of Rate of Mechanical Ventilation Use in Random-effects Model

**eTable 17.** League Table of Drug-related Adverse Events in Fixed-effect Model

**eTable 18.** League Table of Drug-related Adverse Events in Random-effects Model

**eTable 19.** League Table of Rate of Supplemental Oxygen Use in Fixed-effect Model

**eTable 20.** League Table of Rate of Supplemental Oxygen Use in Random-effects Model

**eTable 21.** Cumulative Ranking of Interventions for Different Outcomes

**eTable 22.** Details of GRADE Assessment in All-cause Mortality

**eTable 23.** Details of GRADE Assessment in RSV-related Hospitalization

**eTable 24.** Details of GRADE Assessment in Rate of RSV Infection

**eTable 25.** Details of GRADE Assessment in Drug-related Adverse Events

**eTable 26.** Details of GRADE Assessment in Supplemental Oxygen Use

**eTable 27.** Details of GRADE Assessment in Rate of Mechanical Ventilation Use

**eTable 28.** Details of GRADE Assessment in Rate of ICU Admission

**eTable 29.** Details of GRADE Assessment in Drug-related Serious Adverse Events

**eTable 30.** Bayesian League Table of Rate of RSV Infection in Random-effects Model

**eTable 31.** Bayesian League Table of Rate of RSV Infection in Fixed-effect Model

**eTable 32.** Bayesian League Table of All-cause Mortality in Random-effects Model

**eTable 33.** Bayesian League Table of All-cause Mortality in Fixed-effect Model

**eTable 34.** Bayesian League Table of RSV-related Hospitalization in Random-effects Model

**eTable 35.** Bayesian League Table of RSV-related Hospitalization in Fixed-effect Model

**eTable 36.** Bayesian League Table of Rate of Supplemental Oxygen Use in Random-effects Model

**eTable 37.** Bayesian League Table of Rate of Supplemental Oxygen Use in Fixed-effect Model

**eTable 38.** Bayesian League Table of Rate of Mechanical Ventilation Use in Random-effects Model

**eTable 39.** Bayesian League Table of Rate of Mechanical Ventilation Use in Fixed-effect Model

**eTable 40.** Bayesian League Table of Rate of ICU Admission in Random-effects Model  
**eTable 41.** Bayesian League Table of Rate of ICU Admission in Fixed-effect Model  
**eTable 42.** Bayesian League Table of Drug-related Adverse Events in Random-effects Model  
**eTable 43.** Bayesian League Table of Drug-related Adverse Events in Fixed-effect Model  
**eTable 44.** Bayesian League Table of Drug-related Serious Adverse Events in Random-effects Model  
**eTable 45.** Bayesian League Table of Drug-related Serious Adverse Events in Fixed-effect Model  
**eTable 46.** Details of Continuous Outcomes  
**eFigure 1.** Risk of Bias Assessment  
**eFigure 2.** Network Plot of Rate of RSV Infection  
**eFigure 3.** Network Plot of All-cause Mortality  
**eFigure 4.** Network Plot of RSV-related Hospitalization  
**eFigure 5.** Network Plot of Supplemental Oxygen Use  
**eFigure 6.** Network Plot of Rate of Mechanical Ventilation Use  
**eFigure 7.** Network Plot of Rate of ICU Admission  
**eFigure 8.** Network Plot of Drug-related Adverse Events  
**eFigure 9.** Network Plot of Drug-related Serious Adverse Events  
**eFigure 10.** Results of Motavizumab Compared With Placebo in All-cause Mortality  
**eFigure 11.** Results of Nirsevimab Compared With Placebo in All-cause Mortality  
**eFigure 12.** Results of Palivizumab Compared With Placebo in All-cause Mortality  
**eFigure 13.** Results of Suptavumab Compared With Placebo in All-cause Mortality  
**eFigure 14.** Results of Motavizumab Compared With Palivizumab in All-cause Mortality  
**eFigure 15.** Results of Motavizumab in Combination With Palivizumab Compared With Motavizumab in All-cause Mortality  
**eFigure 16.** Results of Nirsevimab Compared With Placebo in Drug-related Adverse Events  
**eFigure 17.** Results of Palivizumab Compared With Placebo in Drug-related Adverse Events  
**eFigure 18.** Results of Suptavumab Compared With Placebo in Drug-related Adverse Events  
**eFigure 19.** Results of Motavizumab Compared With Palivizumab in Drug-related Adverse Events  
**eFigure 20.** Results of Motavizumab in Combination With Palivizumab Compared With Motavizumab in Drug-related Adverse Events  
**eFigure 21.** Results of Motavizumab Compared With Placebo in Drug-related Serious Adverse Events  
**eFigure 22.** Results of Nirsevimab Compared With Placebo in Drug-related Serious Adverse Events  
**eFigure 23.** Results of Palivizumab Compared With Placebo in Drug-related Serious Adverse Events  
**eFigure 24.** Results of Motavizumab Compared With Palivizumab in Drug-related Serious Adverse Events  
**eFigure 25.** Results of Motavizumab in Combination With Palivizumab Compared With Motavizumab in Drug-related Serious Adverse Events  
**eFigure 26.** Results of Nirsevimab Compared With Placebo in RSV-related Hospitalization  
**eFigure 27.** Results of Palivizumab Compared With Placebo in RSV-related Hospitalization  
**eFigure 28.** Results of Suptavumab Compared With Placebo in RSV-related Hospitalization  
**eFigure 29.** Results of Motavizumab Compared With Palivizumab in RSV-related Hospitalization  
**eFigure 30.** Results of Motavizumab Compared With Placebo in RSV Infection  
**eFigure 31.** Results of Nirsevimab Compared With Placebo in RSV Infection  
**eFigure 32.** Results of Palivizumab Compared With Placebo in RSV Infection  
**eFigure 33.** Results of Suptavumab Compared With Placebo in RSV Infection  
**eFigure 34.** Results of Motavizumab Compared With Placebo in Supplemental Oxygen Use  
**eFigure 35.** Results of Nirsevimab Compared With Placebo in Supplemental Oxygen Use

**eFigure 36.** Results of Motavizumab Compared With Palivizumab in Supplemental Oxygen Use  
**eFigure 37.** Results of Motavizumab Compared With Placebo in Mechanical Ventilation Use  
**eFigure 38.** Results of Nirsevimab Compared With Placebo in Mechanical Ventilation Use  
**eFigure 39.** Results of Palivizumab Compared With Placebo in Mechanical Ventilation Use  
**eFigure 40.** Results of Motavizumab Compared With Palivizumab in Mechanical Ventilation Use  
**eFigure 41.** Results of Motavizumab Compared With Placebo in ICU Admission  
**eFigure 42.** Results of Nirsevimab Compared With Placebo in ICU Admission  
**eFigure 43.** Results of Palivizumab Compared With Placebo in ICU Admission  
**eFigure 44.** Results of Motavizumab Compared With Palivizumab in ICU Admission  
**eFigure 45.** Funnel Plot of All-cause Mortality  
**eFigure 46.** Node-split Plot of All-cause Mortality in Fixed-effect Model  
**eFigure 47.** Node-split Plot of All-cause Mortality in Random-effects Model  
**eFigure 48.** Node-split Plot of Drug-related Adverse Events in Fixed-effect Model  
**eFigure 49.** Node-split Plot of Drug-related Adverse Events in Random-effects Model  
**eFigure 50.** Node-split Plot of Rate of ICU Admission in Fixed-effect Model  
**eFigure 51.** Node-split Plot of Rate of ICU Admission in Random-effects Model  
**eFigure 52.** Node-split Plot of Rate of Mechanical Ventilation Use in Fixed-effect Model  
**eFigure 53.** Node-split Plot of Rate of Mechanical Ventilation Use in Random-effects Model  
**eFigure 54.** Node-split Plot of Rate of RSV Infection in Fixed-effect Model  
**eFigure 55.** Node-split Plot of Rate of RSV Infection in Random-effects Model  
**eFigure 56.** Node-split Plot of Rate of Supplemental Oxygen Use in Fixed-effect Model  
**eFigure 57.** Node-split Plot of Rate of Supplemental Oxygen Use in Random-effects Model  
**eFigure 58.** Node-split Plot of RSV-related Hospitalization in Fixed-effect Model  
**eFigure 59.** Node-split Plot of RSV-related Hospitalization in Random-effects Model  
**eFigure 60.** Contribute Plot of All-cause Mortality  
**eFigure 61.** Contribute Plot of Rate of RSV Infection  
**eFigure 62.** Contribute Plot of RSV-related Hospitalization  
**eFigure 63.** Contribute Plot of Rate of ICU Admission  
**eFigure 64.** Contribute Plot of Rate of Supplemental Oxygen Use  
**eFigure 65.** Contribute Plot of Rate of Mechanical Ventilation Use  
**eFigure 66.** Contribute Plot of Drug-related Adverse Events  
**eFigure 67.** Subgroup Analysis of Rate of RSV Infection  
**eFigure 68.** Subgroup Analysis of RSV-related Hospitalization  
**eFigure 69.** Meta-regression of Age in RSV-related Hospitalization  
**eFigure 70.** Meta-regression of Gender in RSV-related Hospitalization  
**eFigure 71.** Meta-regression of Publication Year in RSV-related Hospitalization  
**eFigure 72.** Comparison of Different Monoclonal Antibodies on Efficacy and Safety Outcomes

This supplementary material has been provided by the authors to give readers additional information about their work.

## eMethods

### Statistical Analysis

Network meta-analysis: We conducted a random-effect model network meta-analysis using a consistency model with “netmeta V1.0-1” package under a frequentist framework in R 1.3.1093 software. Frequentist results were shown in league tables. A league table is a square matrix showing all pairwise comparisons in a network meta-analysis. Typically, both treatment estimates and confidence intervals are shown. The netsplit function was used to assess the inconsistency between direct and indirect estimates and obtain indirect effect estimates. Network estimates that have indirect and direct evidence, these estimates are split into three components. The network estimate, indirect estimate and direct estimate are inspected for consistency. Consistency is assessed mainly by inspection of the point estimate and the confidence intervals. P-scores were used to rank each intervention with the interpretation of the mean extent of certainty that one intervention was better than the other. We used contribute plots to presents the contribution of every interventions. This fuction generates the contribution of direct comparisons to every network treatment comparison. The contribution matrix shows how much each direct treatment effect contributes to each treatment effect estimate from network meta-analysis. The output is a matrix where rows represent network treatment effects and columns represent the contribution of direct treatment effects.

Pairwise meta-analyses: Pairwise meta-analyses were performed using RevMan 5.4.1, and the data were synthesized with a random-effects model to obtain direct effect estimates for each pairwise comparison.

Subgroup analysis, meta-regression, and sensitivity analysis: We conducted the subgroup analysis in direct comparisons for a priori specified variables including health status (healthy vs unhealthy, a predefined hypothesis of larger effect in unhealthy population; unhealthy was defined as participants reported having high-risk factors at baseline). We also performed meta-regression in gestational age, and ratio of male and female. Meta-regression is similar to simple regression, where the outcome of interest is predicted on the basis of one or more explanatory variables. Besides, we performed sensitivity analyses to observe the robustness of results by repeating the analyses using a bayesian hierarchical model, and using both fixed-effects model and random-effects model.

## eResults

Network meta-analysis: Frequentist results were shown in league tables (appendix table S7-20). P-scores were used to rank each intervention with the interpretation of the mean extent of certainty that one intervention was better than the other (appendix table S21). The network plots were shown in appendix figure S2-9. The line width is proportional to the number of studies comparing each pair of interventions, and the size of each node is proportional to the number of participants (sample size). The node-split plots were shown in appendix figure S48-61. The contribute plots were shown in appendix figure S62-68, the matrix showed how much each direct treatment effect contributes to each treatment effect estimate from network meta-analysis.

Pairwise meta-analyses: Results of pairwise meta-analyses were shown in forest plots (appendix figure S10-46). Funnel plot of all-cause mortality was presented in appendix figure S47, showing that there may be no publication bias.

Subgroup analysis, meta-regression, and sensitivity analysis: Bayesian results were shown in league tables as sensitivity analyses (appendix table S31-46).

## Appendix table S1: detailed search strategy

Database: PubMed <Mar 13, 2022>

### Search Strategy:

| #  | Searches                                                                                                                                                                                                                                                                                                                                  | Results |
|----|-------------------------------------------------------------------------------------------------------------------------------------------------------------------------------------------------------------------------------------------------------------------------------------------------------------------------------------------|---------|
| 1  | "Palivizumab" [Mesh]                                                                                                                                                                                                                                                                                                                      | 825     |
| 2  | ((MEDI 493[Title/Abstract]) OR (MEDI-493[Title/Abstract]) OR (MEDI493[Title/Abstract]) OR (Monoclonal Antibody MEDI-493[Title/Abstract]) OR (Monoclonal Antibody MEDI 493[Title/Abstract]) OR (Monoclonal Antibody MEDI493[Title/Abstract]))                                                                                              | 9       |
| 3  | "Synagis" [Title/Abstract]                                                                                                                                                                                                                                                                                                                | 107     |
| 4  | or/1-3                                                                                                                                                                                                                                                                                                                                    | 864     |
| 5  | Motavizumab[Title/Abstract]                                                                                                                                                                                                                                                                                                               | 51      |
| 6  | Nirsevimab[Title/Abstract]                                                                                                                                                                                                                                                                                                                | 14      |
| 7  | MEDI8897[Title/Abstract]                                                                                                                                                                                                                                                                                                                  | 7       |
| 8  | Monoclonal antibod*[Title/Abstract]                                                                                                                                                                                                                                                                                                       | 197,940 |
| 9  | Antibody, Monoclonal[Title/Abstract]                                                                                                                                                                                                                                                                                                      | 112     |
| 10 | "Antibodies, Monoclonal"[Mesh]                                                                                                                                                                                                                                                                                                            | 261,297 |
| 11 | or/4-10                                                                                                                                                                                                                                                                                                                                   | 345,203 |
| 12 | "Respiratory Syncytial Viruses"[Mesh]                                                                                                                                                                                                                                                                                                     | 9,813   |
| 13 | ((Respiratory Syncytial Virus[Title/Abstract]) OR (Syncytial Virus, Respiratory[Title/Abstract]) OR (Syncytial Viruses, Respiratory[Title/Abstract]) OR (Virus, Respiratory Syncytial[Title/Abstract]) OR (Viruses, Respiratory Syncytia[Title/Abstract]) OR (Respiratory Syncytial Virus, Human) OR (Human respiratory syncytial virus)) | 15,694  |
| 14 | #12 OR #13                                                                                                                                                                                                                                                                                                                                | 16,669  |
| 15 | "Respiratory Tract Infections"[Mesh]                                                                                                                                                                                                                                                                                                      | 518,149 |
| 16 | ((Infection, Respiratory Tract[Title/Abstract]) OR (Respiratory Tract Infection[Title/Abstract]) OR (Infections, Respiratory[Title/Abstract]) OR (Infections, Respiratory Tract[Title/Abstract]) OR (Respiratory Infections[Title/Abstract]))                                                                                             | 28,593  |
| 17 | #15 OR #16                                                                                                                                                                                                                                                                                                                                | 53,1434 |
| 18 | "Pneumonia"[Mesh]                                                                                                                                                                                                                                                                                                                         | 242,236 |
| 19 | "Bronchiolitis"[Mesh]                                                                                                                                                                                                                                                                                                                     | 9,276   |
| 20 | #14 OR #17 OR #18 OR #19                                                                                                                                                                                                                                                                                                                  | 543,979 |
| 21 | #11 and #20                                                                                                                                                                                                                                                                                                                               | 7,413   |
| 22 | "clinical trial"[Publication Type]                                                                                                                                                                                                                                                                                                        | 931,808 |
| 23 | "Clinical Trials as Topic"[Mesh]                                                                                                                                                                                                                                                                                                          | 371,437 |
| 24 | "Double-Blind Method"[Mesh]                                                                                                                                                                                                                                                                                                               | 170,548 |
| 25 | (randomized[TIAB] AND (trial[TIAB] OR trials[tiab]))                                                                                                                                                                                                                                                                                      | 411,238 |

|    |                                                                                                                                                      |           |
|----|------------------------------------------------------------------------------------------------------------------------------------------------------|-----------|
| 26 | ((single[TIAB] OR double[TIAB] OR doubled[TIAB] OR triple[TIAB] OR tripled[TIAB] OR treble[TIAB] OR treble[TIAB]) AND (blind*[TIAB] OR mask*[TIAB])) | 210,876   |
| 27 | or/22-26                                                                                                                                             | 1,408,659 |
| 28 | #21 and #27                                                                                                                                          | 890       |

Database: Embase <Mar 13, 2022>

Search Strategy:

| #  | Searches                                                                 | Results |
|----|--------------------------------------------------------------------------|---------|
| 1  | 'palivizumab'/exp                                                        | 3,293   |
| 2  | palivizumab:ti,ab,kw                                                     | 1,544   |
| 3  | synagis:ti,ab,kw                                                         | 179     |
| 4  | 'medi493':ti,ab,kw                                                       | 12      |
| 5  | 'motavizumab'/exp                                                        | 304     |
| 6  | motavizumab:ti,ab,kw                                                     | 69      |
| 7  | 'nirsevimab'/exp                                                         | 71      |
| 8  | nirsevimab:ti,ab,kw                                                      | 20      |
| 9  | MEDI8897:ti,ab,kw                                                        | 15      |
| 10 | 'monoclonal antibody'/exp                                                | 673,595 |
| 11 | or/1-10                                                                  | 673,737 |
| 12 | 'respiratory syncytial virus infection'/exp                              | 6,669   |
| 13 | 'respiratory syncytial virus' OR rsv                                     | 32,136  |
| 14 | 'bronchiolitis'/exp                                                      | 24,500  |
| 15 | bronchiolit*:ti,ab,kw                                                    | 19,154  |
| 16 | 'pneumonia'/exp                                                          | 369,534 |
| 17 | pneumon*:ti,ab,kw OR bronchopneumon*:ti,ab,kw OR pleuropneumon*:ti,ab,kw | 320,840 |
| 18 | 'respiratory tract infection'/exp                                        | 517,513 |
| 19 | 'lower respiratory infection*':ti,ab,kw                                  | 2,305   |
| 20 | 'lower respiratory tract infection*':ti,ab,kw OR lrti:ti,ab,kw           | 11,138  |
| 21 | 'pneumovirus'/exp OR 'human respiratory syncytial virus'/exp             | 20,047  |
| 22 | or/12-21                                                                 | 884,506 |
| 23 | #11 and #22                                                              | 44,911  |
| 24 | rc:ti,ab,kw OR 'randomized controlled trial':ti,ab,kw                    | 163,460 |
| 25 | 'randomized controlled trial'/exp                                        | 702,816 |
| 26 | #24 or #25                                                               | 756,536 |
| 27 | #23 and 26                                                               | 3,662   |

Database: CENTRAL <Mar 13, 2022>

Search Strategy:

| # | Searches                                         | Results |
|---|--------------------------------------------------|---------|
| 1 | MeSH descriptor: [Palivizumab] explode all trees | 49      |
| 2 | (palivizumab):ti,ab,kw                           | 146     |
| 3 | (synagis):ti,ab,kw                               | 33      |
| 4 | (medi493):ti,ab,kw                               | 0       |
| 5 | (motavizumab):ti,ab,kw                           | 23      |

|    |                                                                             |        |
|----|-----------------------------------------------------------------------------|--------|
| 6  | (nirsevimab):ti,ab,kw                                                       | 6      |
| 7  | (MEDI8897):ti,ab,kw                                                         | 14     |
| 8  | MeSH descriptor: [Antibodies, Monoclonal] explode all trees                 | 15,035 |
| 9  | or/1-8                                                                      | 15,147 |
| 10 | MeSH descriptor: [Respiratory Syncytial Virus] explode all trees            | 177    |
| 11 | MeSH descriptor: [Respiratory Syncytial Virus Infections] explode all trees | 330    |
| 12 | ((respiratory syncytial virus* or rsv)):ti,ab,kw                            | 1290   |
| 13 | MeSH descriptor: [Respiratory Syncytial Virus, Human] explode all trees     | 69     |
| 14 | MeSH descriptor: [Bronchiolitis] in all MeSH products                       | 398    |
| 15 | (bronchiolit*):ti,ab,kw                                                     | 1,536  |
| 16 | ((pneumon* or bronchopneumon* or pleuropneumon*)):ti,ab,kw                  | 21,846 |
| 17 | MeSH descriptor: [Respiratory Tract Infections] explode all trees           | 16,984 |
| 18 | ((lower respiratory infection*)):ti,ab,kw                                   | 4,409  |
| 19 | ((lower respiratory tract infection* or lrti)):ti,ab,kw                     | 3,420  |
| 20 | or/10-19                                                                    | 38,085 |
| 21 | #9 and #20                                                                  | 765    |

**Database: ClinicalTrials.gov <Mar 13, 2022>**

| # | Searches                                                                                | Results |
|---|-----------------------------------------------------------------------------------------|---------|
| 1 | Intervention: palivizumab OR synagis OR med493 OR motavizumab OR nirsevimab OR MEDI8897 | 43      |



**Appendix table S2: Excluded studies list**

| Author, Year         | Population                                                       | Intervention                | Outcome                                                                                                                                                                                                                                                                                                                                                                                                                          | Study design | Exclude reasons        |
|----------------------|------------------------------------------------------------------|-----------------------------|----------------------------------------------------------------------------------------------------------------------------------------------------------------------------------------------------------------------------------------------------------------------------------------------------------------------------------------------------------------------------------------------------------------------------------|--------------|------------------------|
| Ramilo O, 2014       | healthy infants                                                  | motavizumab                 | Clinical outcomes data collected included the duration of hospitalization, the need for supplemental oxygen and mechanical ventilation and admission to and length of stay in the intensive care unit (ICU). The incidence of $\geq 1$ or $\geq 3$ medically attended wheezing episodes                                                                                                                                          | RCT          | ineligible population  |
| Meissner HC, 1999    | preterm infants with or without bronchopulmonary dysplasia (BPD) | SB 209763                   | laboratory tests, Safety parameters, RSV disease symptoms, Pharmacokinetic parameters                                                                                                                                                                                                                                                                                                                                            | RCT          | unable to extract data |
| Malley R, 1998       | RSV infection                                                    | palivizumab                 | serum concentration                                                                                                                                                                                                                                                                                                                                                                                                              | RCT          | ineligible population  |
| Mori M, 2014         | children $\leq 24$ months                                        | palivizumab                 | rate of RSV-associated hospitalizations occurring, Blood samples, Adverse events                                                                                                                                                                                                                                                                                                                                                 | NRCT         | wrong study designs    |
| SÁEZ-LLORENS X, 1998 | preterm infants with or without bronchopulmonary dysplasia (BPD) | palivizumab                 | Adverse events, laboratory tests, Pharmacokinetic and immunogenicity assessments                                                                                                                                                                                                                                                                                                                                                 | NRCT         | wrong study designs    |
| Groothuis JR, 2003   | preterm infants                                                  | palivizumab                 | need for hospitalization and hospital course, safety                                                                                                                                                                                                                                                                                                                                                                             | NRCT         | wrong study designs    |
| Brunv, 2000          | preterm infants                                                  | palivizumab                 | —                                                                                                                                                                                                                                                                                                                                                                                                                                | NRCT         | wrong study designs    |
| Alansari K, 2019     | Infants with a confirmed diagnosis of RSV bronchiolitis          | palivizumab                 | The primary efficacy outcome was readmission to either the infirmary- observation unit, hospital, or PICU during the 3 weeks after discharge. Final secondary outcomes were time to medical readiness for discharge on the initial admission, revisit (but not requiring admission) to any medical facility for the same illness in the 3- week follow-up period, and need for transfer to the PICU during the initial admission | RCT          | ineligible population  |
| Alyamovskaya, 2012   | 50–74 years old participants                                     | long-acting beta-2-agonists | The forced expiratory volume in 1 s (FEV1), Skin blood perfusion changes                                                                                                                                                                                                                                                                                                                                                         | RCT          | ineligible population  |
| Lagos R, 2009        | healthy children aged $< 2$ years (gestational age $> 36$ weeks) | motavizumab                 | lower respiratory disease scores, the durations of hospitalization, supplemental oxygen use during hospitalization, in- tensive care unit stay, and mechanical ventilation were also recorded. Adverse events (AEs) and serious AEs were monitored through study day 30                                                                                                                                                          | RCT          | ineligible population  |
| Null D, 2005         | Children at 6 selected centers who had participated in Impact-   | palivizumab                 | Adverse events, palivizumab concentrations and anti-palivizumab reactivity                                                                                                                                                                                                                                                                                                                                                       | NRCT         | wrong study designs    |

|                      |                                                                                                   |                    |                                                                                                                                                                                                                                                                                                                     |      |                        |
|----------------------|---------------------------------------------------------------------------------------------------|--------------------|---------------------------------------------------------------------------------------------------------------------------------------------------------------------------------------------------------------------------------------------------------------------------------------------------------------------|------|------------------------|
|                      | RSV during the 1996–1997 winter season                                                            |                    |                                                                                                                                                                                                                                                                                                                     |      |                        |
| Sáez-Llorens X, 2004 | children $\leq 24$ months                                                                         | palivizumab        | RSV hospitalization and for 30 days after study drug administration for safety, determination of drug serum concentration and clinical outcome                                                                                                                                                                      | RCT  | ineligible population  |
| Domachowski J, 2022  | preterm infants with heart or lung disease                                                        | nirsevimab         | Data on adverse events that occurred during treatment and adverse events of special interest were collected through day 361. Pharma cokinetics and antidrug antibody levels were assessed (see Section S3)                                                                                                          | NRCT | wrong study designs    |
| Marchac, 2006        | —                                                                                                 | palivizumab        | —                                                                                                                                                                                                                                                                                                                   | NRCT | wrong study designs    |
| Man WH, 2020         | healthy preterm infants; Infants were younger than 6 months of age at the start of the RSV season | palivizumab        | primary outcome was to assess the effect of palivizumab during infancy on the respiratory microbiota composition at age 1 year and 6 years; secondary outcomes were assessment of the effect of proven RSV infection in the first year of life on the respiratory microbiota composition at age 1 years and 6 years | RCT  | unable to extract data |
| Makari D, 2014       | preterm infants with chronic lung disease                                                         | palivizumab liquid | adverse events, Antidrug Antibodies                                                                                                                                                                                                                                                                                 | RCT  | ineligible controls    |
| Blanken M, 2012      | Healthy preterm infants                                                                           | palivizumab        | The primary endpoint of the study was the number of wheezing days during the first year of life                                                                                                                                                                                                                     | RCT  | unable to extract data |

**Appendix table S3: Baseline characteristics of included trials**

| First author, Year       | Register number | Journal                              | Country                                                                                                                                                                                                                              | Weight (mean±SD) | Asian (%) | White (%) | Black (%) | Hispanic (%) | American Indian or Alaska Native (%) | Native Hawaiian or other Pacific Islander (%) | Other (%) | Multiple categories (%) |
|--------------------------|-----------------|--------------------------------------|--------------------------------------------------------------------------------------------------------------------------------------------------------------------------------------------------------------------------------------|------------------|-----------|-----------|-----------|--------------|--------------------------------------|-----------------------------------------------|-----------|-------------------------|
| <b>Griffin, 2020</b>     | NCT02878330     | N Engl J Med                         | Argentina, Australia, Belgium, Brazil, Bulgaria, Canada, Chile, Czech Republic, Estonia, Finland, France, Hungary, Italy, Latvia, Lithuania, New Zealand, Poland, South Africa, Spain, Sweden, Turkey, United Kingdom, United States | 4.57±1.93        | 1.03      | 72.18     | 17.6      | NR           | 0.07                                 | 0.76                                          | 7.16      | 1.17                    |
| <b>O'Brien, 2015</b>     | NCT00121108     | Lancet Infect Dis                    | United States                                                                                                                                                                                                                        | 5.16±1.79        | NA        | NA        | NA        | NR           | 98.78                                | NA                                            | 1.22      | NA                      |
| <b>Subramanian, 1998</b> | NR              | Pediatric Infectious Disease Journal | NR                                                                                                                                                                                                                                   | 4.67±0.72        | NR        | NR        | NR        | NR           | NR                                   | NR                                            | NR        | NR                      |
| <b>Hammitt, 2022</b>     | NCT03979313     | N Engl J Med                         | Northern (69%), Southern (31%): Austria, Belgium, Bulgaria, Canada, Estonia, Finland, France, Germany, Israel, Japan, Latvia, Lithuania, Poland, Republic of Korea, Russia, South Africa, Spain, Sweden, United Kingdom,             | NR               | 3.6       | 53.5      | 28.4      | NR           | 5.6                                  | 0.7                                           | 8.1       |                         |

|                                |                                     |                                      |                                                                                                                                                                                                                                      |           |      |       |      |       |      |      |      |     |
|--------------------------------|-------------------------------------|--------------------------------------|--------------------------------------------------------------------------------------------------------------------------------------------------------------------------------------------------------------------------------------|-----------|------|-------|------|-------|------|------|------|-----|
| <b>Feltes, 2011</b>            | NCT002<br>40890,<br>NCT005<br>38785 | Pediatric<br>Research                | Austria, Belgium, Bulgaria, Canada, Czech Republic, Denmark, France, Germany, Hungary, Israel, Lebanon, Poland, Russia, Spain, Sweden, United Kingdom, United States                                                                 | 6.72±2.61 | 1.46 | 86.56 | 3.48 | 3.56  | NR   | NR   | 4.94 | NR  |
| <b>Carbonell-Estrany, 2010</b> | NCT001<br>29766                     | Pediatrics                           | United States, Canada, Austria, Czech Republic, Denmark, France, Germany, Greece, Hungary, Italy, Poland, Spain, Sweden, United Kingdom, Argentina, Australia, Brazil, Bulgaria, Chile, Iceland, Israel, New Zealand, Russia, Turkey | 4.45±1.99 | 1.28 | 78.57 | 7.85 | 8.58  | NR   | NR   | 3.69 | NR  |
| <b>Feltes, 2003</b>            | NR                                  | Journal of Pediatrics                | United States, Canada, Poland, the United Kingdom, Germany, Sweden, France                                                                                                                                                           | 6.05±0.1  | NR   | 70.86 | 8.78 | 11.11 | NR   | NR   | 9.25 | NR  |
| <b>Impact-RSV, 1998</b>        | NR                                  | Pediatrics                           | United States, the United Kingdom, Canada                                                                                                                                                                                            | 4.83±0.1  | 2.2  | 58.06 | 23.7 | 10.92 | NR   | NR   | 5.13 | NR  |
| <b>Simões, 2021</b>            | NCT023<br>25791                     | Clin Infect Dis<br>Clin Infect Dis.  | 18 countries                                                                                                                                                                                                                         | 4.47±1.54 | 0.7  | 86.86 | 8.79 | NR    | 0.17 | 0.17 | 2.35 | NR  |
| <b>Scheltema, 2018</b>         | ISRCTN<br>7364171<br>0              | Lancet Respir Med                    | Netherlands                                                                                                                                                                                                                          | 2.29      | NR   | NR    | NR   | NR    | NR   | NR   | NR   | NR  |
| <b>Domachowski, 2018</b>       | NCT022<br>90340                     | Pediatric Infectious Disease Journal | United States, South Africa, Chile                                                                                                                                                                                                   | 6.82±1.9  | 1.4  | 11.3  | 57.7 | NR    | 1.4  | NR   | 25.4 | 2.8 |
| <b>Tavsu, 2014</b>             | NR                                  | Am J Perinatol.                      | NR                                                                                                                                                                                                                                   | 1.36±0.26 | NR   | NR    | NR   | NR    | NR   | NR   | NR   | NR  |

|                            |                 |                   |                               |         |    |      |    |      |    |    |     |    |
|----------------------------|-----------------|-------------------|-------------------------------|---------|----|------|----|------|----|----|-----|----|
| <b>Fernández,<br/>2010</b> | NCT003<br>16264 | BMC<br>Pediatrics | Chile, New Zealand, Australia | 4.6±1.8 | NR | 27.3 | NR | 63.8 | NR | NR | 8.8 | NR |
|----------------------------|-----------------|-------------------|-------------------------------|---------|----|------|----|------|----|----|-----|----|

**Appendix table S4: Baseline characteristics of included trials**

| First author, Year      | ≥1 smoker in household | Overall smoke exposure | Household crowding, >5 individuals | Bronchopulmonary dysplasia (BPD) (%) | Congenital heart disease (CHD) (%) | Chronic lung disease (CLD) (%) | Timepoint of trial (before/during/after RSV season) | Any atopy (%) | Asthma/Wheezing (%) | Eczema (%)  | Hay fever (%) | Funding                                                                                     |
|-------------------------|------------------------|------------------------|------------------------------------|--------------------------------------|------------------------------------|--------------------------------|-----------------------------------------------------|---------------|---------------------|-------------|---------------|---------------------------------------------------------------------------------------------|
| Griffin, 2020           | NR                     | NR                     | NR                                 | NA                                   | NA                                 | NA                             | before                                              | NR            | NR                  | NR          | NR            | MedImmune/AstraZeneca and Sanofi Pasteur                                                    |
| O'Brien, 2015           | 22.57                  | 67.94                  | 77.76                              | NA                                   | NA                                 | NA                             | during                                              | 20.73         | 18.85               | 4.33        | 8.6           | MedImmune                                                                                   |
| Subramanian, 1998       | NR                     | NR                     | NR                                 | 83.87                                | NR                                 | NR                             | during                                              | NR            | NR                  | NR          | NR            | NR                                                                                          |
| Hammitt, 2022           | NR                     | NR                     | NR                                 | NA                                   | NA                                 | NA                             | before                                              | NR            | NR                  | NR          | NR            | MedImmune/ AstraZeneca and Sanofi                                                           |
| Blanken, 2013           | 16.08/27.74/38.93      | NR                     | NR                                 | NA                                   | NA                                 | NA                             | during                                              | 36.6/35.66    | 10.72/11.19         | 18.18/13.05 | 21.68/22.38   | Abbott Laboratories and by the Netherlands Organization for Health Research and Development |
| Feltes, 2011            | 38.14                  | NR                     | NR                                 | NA                                   | 100                                | NA                             | during                                              | 38.38         | NR                  | NR          | NR            | MedImmune                                                                                   |
| Carbonell-Estrany, 2010 | 32.99                  | NR                     | NR                                 | NR                                   | NR                                 | 21.78                          | during                                              | 44.6          | 27.99               | 16.46       | 20.38         | NR                                                                                          |
| Feltes, 2003            | 33.72                  | NR                     | NR                                 | NA                                   | 100                                | NA                             | during                                              | NR            | 28.21               | NR          | NR            | NR                                                                                          |

|                               |                       |    |    |       |    |      |                    |                |             |                 |                 |                           |
|-------------------------------|-----------------------|----|----|-------|----|------|--------------------|----------------|-------------|-----------------|-----------------|---------------------------|
| <b>Impact-<br/>RSV, 1998</b>  | 35.15                 | NR | NR | 50.73 | NA | NA   | during             | NR             | 35.82       | 16.44           | 28.96           | NR                        |
| <b>Simões,<br/>2021</b>       | NR                    | NR | NR | NA    | NA | NA   | over 3 RSV seasons | NR             | NR          | NR              | NR              | Regeneron Pharmaceuticals |
| <b>Scheltema,<br/>2018</b>    | 16.08/27.74/<br>38.93 | NR | NR | NA    | NA | NA   | during             | 36.6/35<br>.66 | 10.72/11.19 | 18.18/13.<br>05 | 21.68/2<br>2.38 | AbbVie                    |
| <b>Domachows<br/>ke, 2018</b> | NR                    | NR | NR | NA    | NA | NA   | NR                 | NR             | NR          | NR              | NR              | MedImmune                 |
| <b>Tavsu, 2014</b>            | NR                    | NR | NR | NA    | NA | NA   | during             | NR             | NR          | NR              | NR              | NR                        |
| <b>Fernández,<br/>2010</b>    | NR                    | NR | NR | NR    | NR | 15.8 | during             | NR             | NR          | NR              | NR              | MedImmune                 |

**Appendix table S5: risk of bias assessment in dichotomous outcomes**

| Study                     | Randomization process generated | Deviations from the intended intervention | Missing data | Measurement of the outcome | Selection of the reported results | Overall       |
|---------------------------|---------------------------------|-------------------------------------------|--------------|----------------------------|-----------------------------------|---------------|
| Griffin MP, 2020          | Low                             | Low                                       | Low          | Low                        | Low                               | Low           |
| O'Brien KL, 2015          | Low                             | Low                                       | Low          | Low                        | Low                               | Low           |
| Subramanian KN, 1998      | Low                             | Low                                       | Low          | Low                        | Low                               | Low           |
| Hammit LL, 2022           | Low                             | Low                                       | Low          | Low                        | Low                               | Low           |
| Blanken MO, 2013          | Low                             | Low                                       | Low          | Low                        | Low                               | Low           |
| FELTES TF, 2011           | Low                             | Low                                       | Low          | Low                        | Low                               | Low           |
| Carbonell-Estrany X, 2010 | Low                             | Low                                       | Low          | Low                        | Low                               | Low           |
| FELTES TF, 2003           | Low                             | Low                                       | Low          | Low                        | Low                               | Low           |
| IMpact-RSV, 1998          | Low                             | Low                                       | Low          | Low                        | Low                               | Low           |
| Simões EAF, 2021          | Someconcerns                    | Low                                       | Low          | Low                        | Low                               | Someconcerns  |
| Scheltema NM, 2018        | Low                             | Low                                       | Low          | Low                        | Low                               | Low           |
| Domachowske JB, 2018      | Someconcerns                    | Low                                       | Low          | Low                        | Low                               | Someconcerns  |
| Tavsu I, 2014             | Someconcerns                    | Someconcerns                              | Low          | Low                        | Low                               | Someconcerns  |
| Fernández P, 2010         | Low                             | Low                                       | Low          | Low                        | Low                               | Someconcerns* |

\* MedImmune was involved in study design, and analysis and interpretation of data.



**Appendix table S6: risk of bias assessment in continuous outcomes**

| Study                     | Randomization process generated | Deviations from the intended intervention | Missing data | Measurement of the outcome | Selection of the reported results | Overall       |
|---------------------------|---------------------------------|-------------------------------------------|--------------|----------------------------|-----------------------------------|---------------|
| Griffin MP, 2020          | Low                             | Low                                       | Low          | Low                        | Low                               | Low           |
| O'Brien KL, 2015          | Low                             | Low                                       | Low          | Low                        | Someconcerns                      | Someconcerns  |
| Subramanian KN, 1998      | Low                             | Low                                       | Low          | Low                        | Low                               | Low           |
| Hammit LL, 2022           | Low                             | Low                                       | Low          | Low                        | Low                               | Low           |
| Blanken MO, 2013          | Low                             | Low                                       | Low          | Low                        | Low                               | Low           |
| FELTES TF, 2011           | Low                             | Low                                       | Low          | Low                        | Low                               | Low           |
| Carbonell-Estrany X, 2010 | Low                             | Low                                       | Low          | Low                        | Someconcerns                      | Someconcerns  |
| FELTES TF, 2003           | Low                             | Low                                       | Low          | Low                        | Someconcerns                      | Someconcerns  |
| IMpact-RSV, 1998          | Low                             | Low                                       | Low          | Low                        | Low                               | Low           |
| Simões EAF, 2021          | Someconcerns                    | Low                                       | Low          | Low                        | Low                               | Someconcerns  |
| Scheltema NM, 2018        | Low                             | Low                                       | Low          | Low                        | Low                               | Low           |
| Domachowske JB, 2018      | Someconcerns                    | Low                                       | Low          | Low                        | Low                               | Someconcerns  |
| Tavsu I, 2014             | Someconcerns                    | Someconcerns                              | Low          | Low                        | Low                               | Someconcerns  |
| Fernández P, 2010         | Low                             | Low                                       | Low          | Low                        | Low                               | Someconcerns* |

\* MedImmune was involved in study design, and analysis and interpretation of data.

## Appendix table S7-S20: league tables of outcomes in fixed and random models

Outcomes were reported as odds ratio (95% credible interval). All tables list the treatments in alphabetical order. The estimate is in the cell in common between the column-defining intervention and the row-defining intervention. The league table contains the network estimates in the lower triangle and the direct treatment estimates from pairwise comparisons in the upper triangle. The blanks indicate that there is no comparison group for this outcome.

\*Included studies for each outcome assessment:

| Author, year            | Intervention vs comparison | all-cause mortality | rate of RSV infection | RSV-related hospitalization | rate of ICU admission | rate of mechanical ventilation use | drug-related adverse events | rate of supplemental oxygen use |
|-------------------------|----------------------------|---------------------|-----------------------|-----------------------------|-----------------------|------------------------------------|-----------------------------|---------------------------------|
| Griffin, 2020           | Nirsevimab vs placebo      | √                   | √                     | √                           | √                     | √                                  | √                           | √                               |
| O'Brien, 2015           | Motavizumab vs placebo     | √                   | √                     |                             | √                     | √                                  |                             | √                               |
| Subramanian, 1998       | Palivizumab vs placebo     | √                   | √                     | √                           |                       |                                    | √                           |                                 |
| Hammitt, 2022           | Nirsevimab vs placebo      | √                   | √                     | √                           |                       |                                    | √                           |                                 |
| Blanken, 2013           | Palivizumab vs placebo     |                     | √                     | √                           |                       |                                    |                             |                                 |
| Feltes, 2011            | Motavizumab vs Palivizumab | √                   |                       |                             |                       |                                    | √                           |                                 |
| Carbonell-Estrany, 2010 | Motavizumab vs Palivizumab |                     |                       | √                           | √                     | √                                  | √                           | √                               |
| Feltes, 2003            | Palivizumab vs placebo     | √                   |                       | √                           | √                     | √                                  | √                           |                                 |
| IMpact-RSV, 1998        | Palivizumab vs placebo     | √                   |                       | √                           |                       |                                    |                             |                                 |
| Simões, 2021            | Suptavumab vs placebo      | √                   | √                     | √                           |                       |                                    | √                           |                                 |
| Scheltema, 2018         | Palivizumab vs placebo     |                     | √                     |                             |                       |                                    |                             |                                 |
| Domachowske, 2018       | Nirsevimab vs placebo      | √                   |                       |                             |                       |                                    | √                           |                                 |
| Tavsu, 2014             | Palivizumab vs placebo     |                     | √                     | √                           |                       |                                    |                             |                                 |
| Fernández, 2010         | M+P vs Motavizumab         | √                   |                       |                             |                       |                                    | √                           |                                 |

**Appendix table S7: league table of all-cause mortality in fixed effects model**

|                        |                        |                       |                       |                       |
|------------------------|------------------------|-----------------------|-----------------------|-----------------------|
| M+P                    | 1.12<br>(0.10 - 12.54) | .                     | .                     | .                     |
| 1.12<br>(0.10 - 12.54) | Motavizumab            | .                     | 0.89<br>(0.36 - 2.20) | 1.00<br>(0.18 - 5.48) |
| 2.43<br>(0.11 - 55.88) | 2.16<br>(0.29 - 16.03) | Nirsevimab            | .                     | 0.33<br>(0.05 - 1.97) |
| 1.10<br>(0.09 - 14.04) | 0.98<br>(0.44 - 2.20)  | 0.45<br>(0.07 - 2.93) | Palivizumab           | 0.70<br>(0.41 - 1.19) |
| 0.80<br>(0.06 - 10.46) | 0.71<br>(0.29 - 1.74)  | 0.33<br>(0.05 - 1.97) | 0.72<br>(0.43 - 1.21) | Placebo               |

**Appendix table S8: league table of all-cause mortality in random effects model**

|                        |                        |                       |                       |                       |
|------------------------|------------------------|-----------------------|-----------------------|-----------------------|
| M+P                    | 1.12<br>(0.10 - 12.54) | .                     | .                     | .                     |
| 1.12<br>(0.10 - 12.54) | Motavizumab            | .                     | 0.89<br>(0.36 - 2.20) | 1.00<br>(0.18 - 5.48) |
| 2.43<br>(0.11 - 55.88) | 2.16<br>(0.29 - 16.03) | Nirsevimab            | .                     | 0.33<br>(0.05 - 1.97) |
| 1.10<br>(0.09 - 14.04) | 0.98<br>(0.44 - 2.20)  | 0.45<br>(0.07 - 2.93) | Palivizumab           | 0.70<br>(0.41 - 1.19) |
| 0.80<br>(0.06 - 10.46) | 0.71<br>(0.29 - 1.74)  | 0.33<br>(0.05 - 1.97) | 0.72<br>(0.43 - 1.21) | Placebo               |

**Appendix table S9: league table of rate of RSV infection in fixed effects model**

|                                     |                                     |                                     |                                     |                       |
|-------------------------------------|-------------------------------------|-------------------------------------|-------------------------------------|-----------------------|
| Motavizumab                         | .                                   | .                                   | <b>0.17</b><br><b>(0.12 - 0.23)</b> | .                     |
| 0.68<br>(0.41 - 1.14)               | Nirsevimab                          | .                                   | <b>0.24</b><br><b>(0.16 - 0.37)</b> | .                     |
| <b>0.52</b><br><b>(0.32 - 0.86)</b> | 0.77<br>(0.44 - 1.35)               | Palivizumab                         | <b>0.32</b><br><b>(0.22 - 0.47)</b> | .                     |
| <b>0.17</b><br><b>(0.12 - 0.23)</b> | <b>0.24</b><br><b>(0.16 - 0.37)</b> | <b>0.32</b><br><b>(0.22 - 0.47)</b> | Placebo                             | 0.94<br>(0.65 - 1.36) |
| <b>0.16</b><br><b>(0.10 - 0.25)</b> | <b>0.23</b><br><b>(0.13 - 0.40)</b> | <b>0.30</b><br><b>(0.18 - 0.51)</b> | 0.94<br>(0.65 - 1.36)               | Suptavumab            |

**Appendix table S10: league table of rate of RSV infection in random effects model**

|                                     |                                     |                                     |                                     |                       |
|-------------------------------------|-------------------------------------|-------------------------------------|-------------------------------------|-----------------------|
| Motavizumab                         | .                                   | .                                   | <b>0.17</b><br><b>(0.12 - 0.23)</b> | .                     |
| 0.68<br>(0.41 - 1.14)               | Nirsevimab                          | .                                   | <b>0.24</b><br><b>(0.16 - 0.37)</b> | .                     |
| <b>0.52</b><br><b>(0.32 - 0.86)</b> | 0.77<br>(0.44 - 1.35)               | Palivizumab                         | <b>0.32</b><br><b>(0.22 - 0.47)</b> | .                     |
| <b>0.17</b><br><b>(0.12 - 0.23)</b> | <b>0.24</b><br><b>(0.16 - 0.37)</b> | <b>0.32</b><br><b>(0.22 - 0.47)</b> | Placebo                             | 0.94<br>(0.65 - 1.36) |
| <b>0.16</b><br><b>(0.10 - 0.25)</b> | <b>0.23</b><br><b>(0.13 - 0.40)</b> | <b>0.30</b><br><b>(0.18 - 0.51)</b> | 0.94<br>(0.65 - 1.36)               | Suptavumab            |

**Appendix table S11: league table of RSV-related hospitalization in fixed effects model**

|                                     |                                     |                                     |                                     |                       |
|-------------------------------------|-------------------------------------|-------------------------------------|-------------------------------------|-----------------------|
| Motavizumab                         | .                                   | 0.73<br>(0.50 - 1.08)               | .                                   | .                     |
| 1.34<br>(0.60 - 3.01)               | Nirsevimab                          | .                                   | <b>0.25</b><br><b>(0.13 - 0.47)</b> | .                     |
| 0.73<br>(0.50 - 1.08)               | 0.55<br>(0.27 - 1.12)               | Palivizumab                         | <b>0.45</b><br><b>(0.34 - 0.60)</b> | .                     |
| <b>0.33</b><br><b>(0.20 - 0.53)</b> | <b>0.25</b><br><b>(0.13 - 0.47)</b> | <b>0.45</b><br><b>(0.34 - 0.60)</b> | Placebo                             | 1.00<br>(0.52 - 1.92) |
| <b>0.33</b><br><b>(0.15 - 0.74)</b> | <b>0.25</b><br><b>(0.10 - 0.62)</b> | <b>0.45</b><br><b>(0.22 - 0.92)</b> | 1.00<br>(0.52 - 1.92)               | Suptavumab            |

**Appendix table S12: league table of RSV-related hospitalization in random effects model**

|                                     |                                     |                                     |                                     |                       |
|-------------------------------------|-------------------------------------|-------------------------------------|-------------------------------------|-----------------------|
| Motavizumab                         | .                                   | 0.73<br>(0.50 - 1.08)               | .                                   | .                     |
| 1.34<br>(0.60 - 3.01)               | Nirsevimab                          | .                                   | <b>0.25</b><br><b>(0.13 - 0.47)</b> | .                     |
| 0.73<br>(0.50 - 1.08)               | 0.55<br>(0.27 - 1.12)               | Palivizumab                         | <b>0.45</b><br><b>(0.34 - 0.60)</b> | .                     |
| <b>0.33</b><br><b>(0.20 - 0.53)</b> | <b>0.25</b><br><b>(0.13 - 0.47)</b> | <b>0.45</b><br><b>(0.34 - 0.60)</b> | Placebo                             | 1.00<br>(0.52 - 1.92) |
| <b>0.33</b><br><b>(0.15 - 0.74)</b> | <b>0.25</b><br><b>(0.10 - 0.62)</b> | <b>0.45</b><br><b>(0.22 - 0.92)</b> | 1.00<br>(0.52 - 1.92)               | Suptavumab            |



**Appendix table S13: league table of rate of ICU admission in fixed effects model**

|                                     |                                     |                                     |
|-------------------------------------|-------------------------------------|-------------------------------------|
| Motavizumab                         | 0.52<br>(0.24 - 1.12)               | <b>0.10</b><br><b>(0.01 - 0.85)</b> |
| <b>0.47</b><br><b>(0.23 - 0.97)</b> | Palivizumab                         | 0.54<br>(0.27 - 1.07)               |
| <b>0.23</b><br><b>(0.09 - 0.59)</b> | <b>0.50</b><br><b>(0.26 - 0.95)</b> | Placebo                             |

**Appendix table S14: league table of rate of ICU admission in random effects model**

|                                     |                                     |                                     |
|-------------------------------------|-------------------------------------|-------------------------------------|
| Motavizumab                         | 0.52<br>(0.24 - 1.12)               | <b>0.10</b><br><b>(0.01 - 0.85)</b> |
| <b>0.47</b><br><b>(0.23 - 0.97)</b> | Palivizumab                         | 0.54<br>(0.27 - 1.07)               |
| <b>0.23</b><br><b>(0.09 - 0.59)</b> | <b>0.50</b><br><b>(0.26 - 0.95)</b> | Placebo                             |

**Appendix table S15: league table of rate of mechanical ventilation use in fixed effects model**

|                                     |                                     |                       |
|-------------------------------------|-------------------------------------|-----------------------|
| Motavizumab                         | <b>0.18</b><br><b>(0.04 - 0.81)</b> | 0.25<br>(0.02 - 2.76) |
| <b>0.23</b><br><b>(0.06 - 0.83)</b> | Palivizumab                         | 0.57<br>(0.24 - 1.38) |
| <b>0.14</b><br><b>(0.03 - 0.57)</b> | 0.62<br>(0.27 - 1.43)               | Placebo               |

**Appendix table S16: league table of rate of mechanical ventilation use in random effects model**

|                                     |                                     |                       |
|-------------------------------------|-------------------------------------|-----------------------|
| Motavizumab                         | <b>0.18</b><br><b>(0.04 - 0.81)</b> | 0.25<br>(0.02 - 2.76) |
| <b>0.23</b><br><b>(0.06 - 0.83)</b> | Palivizumab                         | 0.57<br>(0.24 - 1.38) |
| <b>0.14</b><br><b>(0.03 - 0.57)</b> | 0.62<br>(0.27 - 1.43)               | Placebo               |

**Appendix table S17: league table of drug-related adverse events in fixed effects model**

|                       |                       |                       |                       |                       |                       |
|-----------------------|-----------------------|-----------------------|-----------------------|-----------------------|-----------------------|
| M+P                   | 0.76<br>(0.40 - 1.42) | .                     | .                     | .                     | .                     |
| 0.76<br>(0.40 - 1.42) | Motavizumab           | .                     | 0.99<br>(0.69 - 1.42) | .                     | .                     |
| 0.83<br>(0.30 - 2.32) | 1.10<br>(0.49 - 2.47) | Nirsevimab            | .                     | 0.93<br>(0.51 - 1.68) | .                     |
| 0.75<br>(0.36 - 1.54) | 0.99<br>(0.69 - 1.42) | 0.90<br>(0.44 - 1.85) | Palivizumab           | 1.03<br>(0.68 - 1.56) | .                     |
| 0.77<br>(0.34 - 1.77) | 1.02<br>(0.59 - 1.76) | 0.93<br>(0.51 - 1.68) | 1.03<br>(0.68 - 1.56) | Placebo               | 0.99<br>(0.60 - 1.65) |
| 0.77<br>(0.29 - 2.03) | 1.01<br>(0.48 - 2.14) | 0.92<br>(0.42 - 2.01) | 1.02<br>(0.53 - 1.97) | 0.99<br>(0.60 - 1.65) | Suptavumab            |

**Appendix table S18: league table of drug-related adverse events in random effects model**

|                       |                       |                       |                       |                       |                       |
|-----------------------|-----------------------|-----------------------|-----------------------|-----------------------|-----------------------|
| M+P                   | 0.76<br>(0.40 - 1.42) | .                     | .                     | .                     | .                     |
| 0.76<br>(0.40 - 1.42) | Motavizumab           | .                     | 0.99<br>(0.69 - 1.42) | .                     | .                     |
| 0.83<br>(0.30 - 2.32) | 1.10<br>(0.49 - 2.47) | Nirsevimab            | .                     | 0.93<br>(0.51 - 1.68) | .                     |
| 0.75<br>(0.36 - 1.54) | 0.99<br>(0.69 - 1.42) | 0.90<br>(0.44 - 1.85) | Palivizumab           | 1.03<br>(0.68 - 1.56) | .                     |
| 0.77<br>(0.34 - 1.77) | 1.02<br>(0.59 - 1.76) | 0.93<br>(0.51 - 1.68) | 1.03<br>(0.68 - 1.56) | Placebo               | 0.99<br>(0.60 - 1.65) |
| 0.77<br>(0.29 - 2.03) | 1.01<br>(0.48 - 2.14) | 0.92<br>(0.42 - 2.01) | 1.02<br>(0.53 - 1.97) | 0.99<br>(0.60 - 1.65) | Suptavumab            |

**Appendix table S19: league table of rate of supplemental oxygen use in fixed effects model**

|                                     |                                     |                                     |                                     |
|-------------------------------------|-------------------------------------|-------------------------------------|-------------------------------------|
| Motavizumab                         | .                                   | 0.64<br>(0.39 - 1.06)               | <b>0.12</b><br><b>(0.07 - 0.19)</b> |
| 0.90<br>(0.26 - 3.04)               | Nirsevimab                          | .                                   | <b>0.13</b><br><b>(0.04 - 0.39)</b> |
| 0.64<br>(0.39 - 1.06)               | 0.72<br>(0.19 - 2.68)               | Palivizumab                         | .                                   |
| <b>0.12</b><br><b>(0.07 - 0.19)</b> | <b>0.13</b><br><b>(0.04 - 0.39)</b> | <b>0.18</b><br><b>(0.09 - 0.37)</b> | Placebo                             |

**Appendix table S20: league table of rate of supplemental oxygen use in random effects model**

|                                     |                                     |                                     |                                     |
|-------------------------------------|-------------------------------------|-------------------------------------|-------------------------------------|
| Motavizumab                         | .                                   | 0.64<br>(0.39 - 1.06)               | <b>0.12</b><br><b>(0.07 - 0.19)</b> |
| 0.90<br>(0.26 - 3.04)               | Nirsevimab                          | .                                   | <b>0.13</b><br><b>(0.04 - 0.39)</b> |
| 0.64<br>(0.39 - 1.06)               | 0.72<br>(0.19 - 2.68)               | Palivizumab                         | .                                   |
| <b>0.12</b><br><b>(0.07 - 0.19)</b> | <b>0.13</b><br><b>(0.04 - 0.39)</b> | <b>0.18</b><br><b>(0.09 - 0.37)</b> | Placebo                             |



**Appendix table S21: cumulative ranking of interventions for different outcomes**

Strategies were ranked according to P score, which is the mean extent of certainty that one intervention is better than another, averaged over all competing interventions.

| Outcome                            | Rank | Intervention |
|------------------------------------|------|--------------|
| Rate of RSV infection              | 1    | Motavizumab  |
|                                    | 2    | Nirsevimab   |
|                                    | 3    | Palivizumab  |
|                                    | 4    | Placebo      |
|                                    | 5    | Suptavumab   |
| All-cause mortality                | 1    | Nirsevimab   |
|                                    | 2    | Palivizumab  |
|                                    | 3    | Motavizumab  |
|                                    | 4    | M+P          |
|                                    | 5    | Placebo      |
| RSV-related hospitalization        | 1    | Nirsevimab   |
|                                    | 2    | Motavizumab  |
|                                    | 3    | Palivizumab  |
|                                    | 4    | Suptavumab   |
|                                    | 5    | Placebo      |
| Rate of supplemental oxygen use    | 1    | Motavizumab  |
|                                    | 2    | Nirsevimab   |
|                                    | 3    | Palivizumab  |
|                                    | 4    | Placebo      |
| Rate of mechanical ventilation use | 1    | Motavizumab  |
|                                    | 2    | Palivizumab  |
|                                    | 3    | Placebo      |
| Rate of ICU admission              | 1    | Motavizumab  |
|                                    | 2    | Palivizumab  |
|                                    | 3    | Placebo      |
| Drug-related adverse events        | 1    | M+P          |
|                                    | 2    | Nirsevimab   |
|                                    | 3    | Placebo      |
|                                    | 4    | Suptavumab   |
|                                    | 5    | Motavizumab  |
|                                    | 6    | Palivizumab  |

**Appendix table S22: details of GRADE assessment in all-cause mortality**

| All-cause mortality         |                            |                                           |                              |                                           |                             |                       |
|-----------------------------|----------------------------|-------------------------------------------|------------------------------|-------------------------------------------|-----------------------------|-----------------------|
| Comparison                  | Direct odds ratio (95% CI) | Certainty of evidence without imprecision | Indirect odds ratio (95% CI) | Certainty of evidence without imprecision | Network odds ratio (95% CI) | Certainty of evidence |
| Nirsevimab vs. Placebo      | 0.33 [0.05, 1.97]          | High                                      | —                            | —                                         | 0.33 [0.05, 1.97]           | Moderate‡             |
| Motavizumab vs. Placebo     | 1.00 [0.18, 5.48]          | High                                      | 0.62 [0.22, 1.78]            | High                                      | 0.71 [0.29, 1.74]           | Moderate‡             |
| Palivizumab vs. Placebo     | 0.70 [0.41, 1.19]          | High                                      | 1.13 [0.16, 7.73]            | High                                      | 0.72 [0.43, 1.21]           | Moderate‡             |
| Suptavumab vs. Placebo      | 1.37 [0.06, 33.61]         | Moderate*                                 | —                            | —                                         | 1.37 [0.06, 33.61]          | Low§                  |
| Motavizumab vs. Palivizumab | 0.89 [0.36, 2.20]          | High                                      | 1.43 [0.24, 8.49]            | High                                      | 0.98 [0.44, 2.20]           | Moderate‡             |
| M+P vs. Motavizumab         | 1.12 [0.10, 12.54]         | Moderate†                                 | —                            | —                                         | 1.12 [0.10, 12.54]          | Low§                  |
| M+P vs. Nirsevimab          | —                          | —                                         | 2.43 [0.11, 55.88]           | Moderate†                                 | 2.43 [0.11, 55.88]          | Low§                  |
| M+P vs. Palivizumab         | —                          | —                                         | 1.10 [0.09, 14.04]           | Moderate†                                 | 1.10 [0.09, 14.04]          | Low§                  |
| M+P vs. Placebo             | —                          | —                                         | 0.80 [0.06, 10.46]           | Moderate†                                 | 0.80 [0.06, 10.46]          | Low§                  |
| Motavizumab vs. Nirsevimab  | —                          | —                                         | 2.16 [0.29, 16.03]           | High                                      | 2.16 [0.29, 16.03]          | Moderate‡             |
| Nirsevimab vs. Palivizumab  | —                          | —                                         | 0.45 [0.07, 2.93]            | High                                      | 0.45 [0.07, 2.93]           | Moderate‡             |
| Suptavumab vs. M+P          | —                          | —                                         | —                            | —                                         | —                           | —                     |
| Suptavumab vs. Motavizumab  | —                          | —                                         | —                            | —                                         | —                           | —                     |
| Suptavumab vs. Nirsevimab   | —                          | —                                         | —                            | —                                         | —                           | —                     |
| Suptavumab vs. Palivizumab  | —                          | —                                         | —                            | —                                         | —                           | —                     |

\*Downgraded 1 level due to risk of bias.

†Downgraded 1 level due to risk of bias.

‡Downgraded 1 level due to imprecision.

§Downgraded 2 level due to imprecision and risk of bias.

**Appendix table S23: details of GRADE assessment in RSV-related hospitalization**

| RSV-related hospitalization |                            |                                           |                              |                                           |                             |                       |
|-----------------------------|----------------------------|-------------------------------------------|------------------------------|-------------------------------------------|-----------------------------|-----------------------|
| Comparison                  | Direct odds ratio (95% CI) | Certainty of evidence without imprecision | Indirect odds ratio (95% CI) | Certainty of evidence without imprecision | Network odds ratio (95% CI) | Certainty of evidence |
| Nirsevimab vs. Placebo      | 0.25 [0.13, 0.47]          | High                                      | —                            | —                                         | 0.25 [0.13, 0.47]           | High                  |
| Palivizumab vs. Placebo     | 0.45 [0.34, 0.60]          | High                                      | —                            | —                                         | 0.45 [0.34, 0.60]           | High                  |
| Motavizumab vs. Palivizumab | 0.73 [0.50, 1.08]          | High                                      | —                            | —                                         | 0.73 [0.50, 1.08]           | Moderate†             |
| Suptavumab vs. Placebo      | 1.00 [0.52, 1.92]          | Moderate*                                 | —                            | —                                         | 1.00 [0.52, 1.92]           | Low‡                  |
| Motavizumab vs. Nirsevimab  | —                          | —                                         | 1.34 [0.60, 3.01]            | High                                      | 1.34 [0.60, 3.01]           | Moderate†             |
| Motavizumab vs. Placebo     | —                          | —                                         | 0.33 [0.20, 0.53]            | High                                      | 0.33 [0.20, 0.53]           | High                  |
| Motavizumab vs. Suptavumab  | —                          | —                                         | 0.33 [0.15, 0.74]            | Moderate*                                 | 0.33 [0.15, 0.74]           | Moderate*             |
| Nirsevimab vs. Palivizumab  | —                          | —                                         | 0.55 [0.27, 1.12]            | High                                      | 0.55 [0.27, 1.12]           | Moderate†             |
| Nirsevimab vs. Suptavumab   | —                          | —                                         | 0.25 [0.10, 0.62]            | Moderate*                                 | 0.25 [0.10, 0.62]           | Moderate*             |
| Palivizumab vs. Suptavumab  | —                          | —                                         | 0.45 [0.22, 0.92]            | Moderate*                                 | 0.45 [0.22, 0.92]           | Moderate*             |

\*Downgraded 1 level due to risk of bias.

†Downgraded 1 level due to imprecision.

‡Downgraded 2 level due to imprecision and risk of bias.

**Appendix table S24: details of GRADE assessment in rate of RSV infection**

| Rate of RSV infection       |                            |                                           |                              |                                           |                             |                       |
|-----------------------------|----------------------------|-------------------------------------------|------------------------------|-------------------------------------------|-----------------------------|-----------------------|
| Comparison                  | Direct odds ratio (95% CI) | Certainty of evidence without imprecision | Indirect odds ratio (95% CI) | Certainty of evidence without imprecision | Network odds ratio (95% CI) | Certainty of evidence |
| Nirsevimab vs. Placebo      | 0.24 [0.16, 0.37]          | High                                      | —                            | —                                         | 0.24 [0.16, 0.37]           | High                  |
| Motavizumab vs. Placebo     | 0.17 [0.12, 0.23]          | High                                      | —                            | —                                         | 0.17 [0.12, 0.23]           | Moderate‡             |
| Palivizumab vs. Placebo     | 0.32 [0.22, 0.47]          | Moderate*                                 | —                            | —                                         | 0.32 [0.22, 0.47]           | Moderate*             |
| Suptavumab vs. Placebo      | 1.06 [0.73, 1.53]          | Moderate*                                 | —                            | —                                         | 1.06 [0.73, 1.53]           | Low†                  |
| Motavizumab vs. Nirsevimab  | —                          | —                                         | 0.68 [0.41, 1.14]            | High                                      | 0.68 [0.41, 1.14]           | Moderate‡             |
| Motavizumab vs. Palivizumab | —                          | —                                         | 0.52 [0.32, 0.86]            | Moderate*                                 | 0.52 [0.32, 0.86]           | Moderate*             |
| Motavizumab vs. Suptavumab  | —                          | —                                         | 0.16 [0.10, 0.25]            | Moderate*                                 | 0.16 [0.10, 0.25]           | Moderate*             |
| Nirsevimab vs. Palivizumab  | —                          | —                                         | 0.77 [0.44, 1.35]            | Moderate*                                 | 0.77 [0.44, 1.35]           | Low†                  |
| Nirsevimab vs. Suptavumab   | —                          | —                                         | 0.23 [0.13, 0.40]            | Moderate*                                 | 0.23 [0.13, 0.40]           | Moderate*             |
| Palivizumab vs. Suptavumab  | —                          | —                                         | 0.30 [0.18, 0.51]            | Moderate*                                 | 0.30 [0.18, 0.51]           | Moderate*             |

\*Downgraded 1 level due to risk of bias.

†Downgraded 2 level due to risk of bias and imprecision.

‡Downgraded 1 level due to imprecision.

**Appendix table S25: details of GRADE assessment in drug-related adverse events**

| Drug-related AE             |                            |                                           |                              |                                           |                             |                       |
|-----------------------------|----------------------------|-------------------------------------------|------------------------------|-------------------------------------------|-----------------------------|-----------------------|
| Comparison                  | Direct odds ratio (95% CI) | Certainty of evidence without imprecision | Indirect odds ratio (95% CI) | Certainty of evidence without imprecision | Network odds ratio (95% CI) | Certainty of evidence |
| Nirsevimab vs. Placebo      | 0.93 [0.51, 1.68]          | High                                      | —                            | —                                         | 0.93 [0.51, 1.68]           | Moderate†             |
| Palivizumab vs. Placebo     | 1.03 [0.68, 1.56]          | High                                      | —                            | —                                         | 1.03 [0.68, 1.56]           | Moderate†             |
| Motavizumab vs. Palivizumab | 0.99 [0.69, 1.42]          | High                                      | —                            | —                                         | 0.99 [0.69, 1.42]           | Moderate†             |
| M+P vs. Motavizumab         | 0.76 [0.40, 1.42]          | Moderate*                                 | —                            | —                                         | 0.76 [0.40, 1.42]           | Low‡                  |
| Suptavumab vs. Placebo      | 1.01 [0.61, 1.68]          | Moderate*                                 | —                            | —                                         | 1.01 [0.61, 1.68]           | Low‡                  |
| M+P vs. Nirsevimab          | —                          | —                                         | 0.83 [0.30, 2.32]            | Moderate*                                 | 0.83 [0.30, 2.32]           | Low‡                  |
| M+P vs. Palivizumab         | —                          | —                                         | 0.75 [0.36, 1.54]            | Moderate*                                 | 0.75 [0.36, 1.54]           | Low‡                  |
| M+P vs. Placebo             | —                          | —                                         | 0.77 [0.34, 1.77]            | Moderate*                                 | 0.77 [0.34, 1.77]           | Low‡                  |
| M+P vs. Suptavumab          | —                          | —                                         | 0.77 [0.29, 2.03]            | Moderate*                                 | 0.77 [0.29, 2.03]           | Low‡                  |
| Motavizumab vs. Nirsevimab  | —                          | —                                         | 1.10 [0.49, 2.47]            | High                                      | 1.10 [0.49, 2.47]           | Moderate†             |
| Motavizumab vs. Placebo     | —                          | —                                         | 1.02 [0.59, 1.76]            | High                                      | 1.02 [0.59, 1.76]           | Moderate†             |
| Motavizumab vs. Suptavumab  | —                          | —                                         | 1.01 [0.48, 2.14]            | Moderate*                                 | 1.01 [0.48, 2.14]           | Low‡                  |
| Nirsevimab vs. Palivizumab  | —                          | —                                         | 0.90 [0.44, 1.85]            | High                                      | 0.90 [0.44, 1.85]           | Moderate†             |
| Nirsevimab vs. Suptavumab   | —                          | —                                         | 0.92 [0.42, 2.01]            | Moderate*                                 | 0.92 [0.42, 2.01]           | Low‡                  |
| Palivizumab vs. Suptavumab  | —                          | —                                         | 1.02 [0.53, 1.97]            | Moderate*                                 | 1.02 [0.53, 1.97]           | Low‡                  |

\*Downgraded 1 level due to risk of bias.

†Downgraded 1 level due to imprecision.

‡Downgraded 2 level due to imprecision and risk of bias.

**Appendix table S26: details of GRADE assessment in supplemental oxygen use**

| Rate of supplemental oxygen use |                            |                                           |                              |                                           |                             |                       |
|---------------------------------|----------------------------|-------------------------------------------|------------------------------|-------------------------------------------|-----------------------------|-----------------------|
| Comparison                      | Direct odds ratio (95% CI) | Certainty of evidence without imprecision | Indirect odds ratio (95% CI) | Certainty of evidence without imprecision | Network odds ratio (95% CI) | Certainty of evidence |
| Nirsevimab vs. Placebo          | 0.13 [0.04, 0.39]          | High                                      | —                            | —                                         | 0.13 [0.04, 0.39]           | Moderate*             |
| Motavizumab vs. Placebo         | 0.12 [0.07, 0.19]          | High                                      | —                            | —                                         | 0.12 [0.07, 0.19]           | Moderate*             |
| Motavizumab vs. Palivizumab     | 0.64 [0.39, 1.06]          | High                                      | —                            | —                                         | 0.64 [0.39, 1.06]           | Moderate*             |
| Motavizumab vs. Nirsevimab      | —                          | —                                         | 0.90 [0.26, 3.04]            | High                                      | 0.90 [0.26, 3.04]           | Moderate*             |
| Nirsevimab vs. Palivizumab      | —                          | —                                         | 0.72 [0.19, 2.68]            | High                                      | 0.72 [0.19, 2.68]           | Moderate*             |
| Palivizumab vs. Placebo         | —                          | —                                         | 0.18 [0.09, 0.37]            | High                                      | 0.18 [0.09, 0.37]           | Moderate*             |

\*Downgraded 1 level due to imprecision.

**Appendix table S27: details of GRADE assessment in rate of mechanical ventilation use**

| Rate of MV use              |                            |                                           |                              |                                           |                             |                       |
|-----------------------------|----------------------------|-------------------------------------------|------------------------------|-------------------------------------------|-----------------------------|-----------------------|
| Comparison                  | Direct odds ratio (95% CI) | Certainty of evidence without imprecision | Indirect odds ratio (95% CI) | Certainty of evidence without imprecision | Network odds ratio (95% CI) | Certainty of evidence |
| Motavizumab vs. Placebo     | 0.25 [0.02, 2.76]          | High                                      | 0.10 [0.02, 0.59]            | High                                      | 0.14 [0.03, 0.57]           | Moderate*             |
| Palivizumab vs. Placebo     | 0.57 [0.24, 1.38]          | High                                      | 1.39 [0.08, 23.67]           | High                                      | 0.62 [0.27, 1.43]           | Moderate*             |
| Nirsevimab vs. Placebo      | 0.16 [0.01, 4.05]          | High                                      | —                            | —                                         | 0.16 [0.01, 4.05]           | Moderate*             |
| Motavizumab vs. Palivizumab | 0.18 [0.04, 0.81]          | High                                      | 0.44 [0.03, 5.61]            | High                                      | 0.23 [0.06, 0.83]           | Moderate*             |
| Motavizumab vs. Nirsevimab  | —                          | —                                         | —                            | —                                         | —                           | —                     |
| Palivizumab vs. Nirsevimab  | —                          | —                                         | —                            | —                                         | —                           | —                     |

\*Downgraded 1 level due to imprecision.

**Appendix table S28: details of GRADE assessment in rate of ICU admission**

| Rate of ICU admission       |                            |                                           |                              |                                           |                             |                       |
|-----------------------------|----------------------------|-------------------------------------------|------------------------------|-------------------------------------------|-----------------------------|-----------------------|
| Comparison                  | Direct odds ratio (95% CI) | Certainty of evidence without imprecision | Indirect odds ratio (95% CI) | Certainty of evidence without imprecision | Network odds ratio (95% CI) | Certainty of evidence |
| Motavizumab vs. Placebo     | 0.10 [0.01, 0.85]          | High                                      | 0.28 [0.10, 0.79]            | High                                      | 0.23 [0.09, 0.59]           | Moderate*             |
| Palivizumab vs. Placebo     | 0.54 [0.27, 1.07]          | High                                      | 0.19 [0.02, 1.87]            | High                                      | 0.50 [0.26, 0.95]           | Moderate*             |
| Nirsevimab vs. Placebo      | 0.04 [0.00, 0.81]          | High                                      | —                            | —                                         | 0.04 [0.00, 0.81]           | Moderate*             |
| Motavizumab vs. Palivizumab | 0.52 [0.24, 1.12]          | High                                      | 0.18 [0.02, 1.76]            | High                                      | 0.47 [0.23, 0.97]           | Moderate*             |
| Motavizumab vs. Nirsevimab  | —                          | —                                         | —                            | —                                         | —                           | —                     |
| Palivizumab vs. Nirsevimab  | —                          | —                                         | —                            | —                                         | —                           | —                     |

\*Downgraded 1 level due to imprecision.



**Appendix table S29: details of GRADE assessment in drug-related serious adverse events**

| Drug-related SAE            |                            |                       |
|-----------------------------|----------------------------|-----------------------|
| Comparison                  | Direct odds ratio (95% CI) | Certainty of evidence |
| Motavizumab vs. Placebo     | 8.56 [0.49, 148.58]        | Moderate*             |
| Palivizumab vs. Placebo     | 0.14 [0.01, 2.80]          | Moderate*             |
| Nirsevimab vs. Placebo      | —                          | —                     |
| Motavizumab vs. Palivizumab | 0.82 [0.25, 2.71]          | Moderate*             |
| M+P vs. Motavizumab         | 1.12 [0.10, 12.54]         | Low†                  |

\*Downgraded 1 level due to imprecision.

†Downgraded 2 level due to imprecision and risk of bias.

**Appendix table S30-S45: Bayesian league tables of outcomes in fixed and random models**

Outcomes were reported as odds ratio (95% credible interval). All tables list the treatments in alphabetical order. The estimate is in the cell in common between the column-defining intervention and the row-defining intervention. The league table contains pairwise comparisons of the treatment in the row versus the treatment in the column in the lower triangle and column versus row in the upper triangle.

**Appendix table S30: Bayesian league table of rate of RSV infection in random effects model**

|                      |                      |                      |                       |                       |
|----------------------|----------------------|----------------------|-----------------------|-----------------------|
| Motavizumab          | 1.45<br>(0.37, 5.65) | 1.97<br>(0.58, 7.97) | 6.02<br>(2.02, 17.99) | 6.40<br>(1.37, 30.44) |
| 0.69<br>(0.18, 2.72) | Nirsevimab           | 1.36<br>(0.49, 4.48) | 4.14<br>(1.83, 9.60)  | 4.40<br>(1.13, 17.82) |
| 0.51<br>(0.13, 1.73) | 0.74<br>(0.22, 2.04) | Palivizumab          | 3.05<br>(1.36, 5.94)  | 3.26<br>(0.81, 11.29) |
| 0.17<br>(0.06, 0.50) | 0.24<br>(0.10, 0.55) | 0.33<br>(0.17, 0.74) | Placebo               | 1.06<br>(0.36, 3.23)  |
| 0.16<br>(0.03, 0.73) | 0.23<br>(0.06, 0.88) | 0.31<br>(0.09, 1.24) | 0.94<br>(0.31, 2.79)  | Suptavumab            |

**Appendix table S31: Bayesian league table of rate of RSV infection in fixed effects model**

|                      |                      |                      |                      |                       |
|----------------------|----------------------|----------------------|----------------------|-----------------------|
| Motavizumab          | 1.47<br>(0.87, 2.45) | 1.91<br>(1.16, 3.13) | 6.03<br>(4.43, 8.31) | 6.42<br>(3.97, 10.45) |
| 0.68<br>(0.41, 1.15) | Nirsevimab           | 1.30<br>(0.74, 2.28) | 4.11<br>(2.75, 6.22) | 4.37<br>(2.55, 7.64)  |
| 0.53<br>(0.32, 0.86) | 0.77<br>(0.44, 1.35) | Palivizumab          | 3.17<br>(2.17, 4.65) | 3.37<br>(2.00, 5.76)  |
| 0.17<br>(0.12, 0.23) | 0.24<br>(0.16, 0.36) | 0.32<br>(0.21, 0.46) | Placebo              | 1.06<br>(0.74, 1.54)  |
| 0.16<br>(0.1, 0.25)  | 0.23<br>(0.13, 0.39) | 0.30<br>(0.17, 0.50) | 0.94<br>(0.65, 1.35) | Suptavumab            |

**Appendix table S32: Bayesian league table of all-cause mortality in random effects model**

|                       |                      |                       |                      |                       |                                          |
|-----------------------|----------------------|-----------------------|----------------------|-----------------------|------------------------------------------|
| M+P                   | 0.73<br>(0.02, 9.32) | 0.91<br>(0.02, 21.63) | 0.72<br>(0.02, 10.7) | 1.04<br>(0.03, 15.68) | 113751.74<br>(0.19, 1764267809536012800) |
| 1.38<br>(0.11, 43.94) | Motavizumab          | 1.28<br>(0.23, 8.13)  | 1<br>(0.44, 2.28)    | 1.45<br>(0.58, 3.55)  | 171012.94<br>(0.49, 2485624818560194560) |
| 1.09<br>(0.05, 49.59) | 0.78<br>(0.12, 4.39) | Nirsevimab            | 0.79<br>(0.14, 3.69) | 1.14<br>(0.22, 4.86)  | 130929.84<br>(0.34, 1885003463665145600) |
| 1.38<br>(0.09, 47.81) | 1<br>(0.44, 2.26)    | 1.26<br>(0.27, 7.04)  | Palivizumab          | 1.44<br>(0.86, 2.43)  | 169161.91<br>(0.51, 2442958399732975616) |
| 0.96<br>(0.06, 33.48) | 0.69<br>(0.28, 1.71) | 0.88<br>(0.21, 4.53)  | 0.69<br>(0.41, 1.16) | Placebo               | 117377.89<br>(0.36, 1628536804196702720) |
| 0<br>(0, 5.4)         | 0<br>(0, 2.05)       | 0<br>(0, 2.94)        | 0<br>(0, 1.96)       | 0<br>(0, 2.77)        | Suptavumab                               |

**Appendix table S33: Bayesian league table of all-cause mortality in fixed effects model**

|                       |                      |                       |                      |                       |                                          |
|-----------------------|----------------------|-----------------------|----------------------|-----------------------|------------------------------------------|
| M+P                   | 0.73<br>(0.02, 9.32) | 0.91<br>(0.02, 21.63) | 0.72<br>(0.02, 10.7) | 1.04<br>(0.03, 15.68) | 113751.74<br>(0.19, 1764267809536012800) |
| 1.38<br>(0.11, 43.94) | Motavizumab          | 1.28<br>(0.23, 8.13)  | 1<br>(0.44, 2.28)    | 1.45<br>(0.58, 3.55)  | 171012.94<br>(0.49, 2485624818560194560) |
| 1.09<br>(0.05, 49.59) | 0.78<br>(0.12, 4.39) | Nirsevimab            | 0.79<br>(0.14, 3.69) | 1.14<br>(0.22, 4.86)  | 130929.84<br>(0.34, 1885003463665145600) |
| 1.38<br>(0.09, 47.81) | 1<br>(0.44, 2.26)    | 1.26<br>(0.27, 7.04)  | Palivizumab          | 1.44<br>(0.86, 2.43)  | 169161.91<br>(0.51, 2442958399732975616) |
| 0.96<br>(0.06, 33.48) | 0.69<br>(0.28, 1.71) | 0.88<br>(0.21, 4.53)  | 0.69<br>(0.41, 1.16) | Placebo               | 117377.89<br>(0.36, 1628536804196702720) |
| 0<br>(0, 5.4)         | 0<br>(0, 2.05)       | 0<br>(0, 2.94)        | 0<br>(0, 1.96)       | 0<br>(0, 2.77)        | Suptavumab                               |

**Appendix table S34: Bayesian league table of RSV-related hospitalization in random effects model**

|                      |                        |                       |                       |                         |
|----------------------|------------------------|-----------------------|-----------------------|-------------------------|
| Motavizumab          | 1.52<br>(0.02, 260.25) | 1.37<br>(0.04, 51.21) | 5.9<br>(0.16, 472.6)  | 6.02<br>(0.04, 1972.77) |
| 0.66<br>(0, 52.44)   | Nirsevimab             | 0.88<br>(0.03, 14.59) | 3.91<br>(0.3, 53.02)  | 3.98<br>(0.05, 344.37)  |
| 0.73<br>(0.02, 25.9) | 1.13<br>(0.07, 36.1)   | Palivizumab           | 4.43<br>(1.06, 35.88) | 4.44<br>(0.11, 357.65)  |
| 0.17<br>(0, 6.29)    | 0.26<br>(0.02, 3.38)   | 0.23<br>(0.03, 0.94)  | Placebo               | 1.01<br>(0.03, 38.5)    |
| 0.17<br>(0, 25.25)   | 0.25<br>(0, 20.55)     | 0.23<br>(0, 8.76)     | 0.99<br>(0.03, 36.09) | Suptavumab              |

**Appendix table S35: Bayesian league table of RSV-related hospitalization in fixed effects model**

|                      |                      |                      |                      |                       |
|----------------------|----------------------|----------------------|----------------------|-----------------------|
| Motavizumab          | 0.84<br>(0.37, 1.87) | 1.37<br>(0.93, 2.01) | 3.5<br>(2.17, 5.65)  | 3.54<br>(1.59, 8.16)  |
| 1.19<br>(0.54, 2.73) | Nirsevimab           | 1.62<br>(0.81, 3.4)  | 4.15<br>(2.2, 8.21)  | 4.22<br>(1.69, 11.05) |
| 0.73<br>(0.5, 1.07)  | 0.62<br>(0.29, 1.24) | Palivizumab          | 2.56<br>(1.94, 3.39) | 2.59<br>(1.28, 5.43)  |
| 0.29<br>(0.18, 0.46) | 0.24<br>(0.12, 0.45) | 0.39<br>(0.29, 0.52) | Placebo              | 1.01<br>(0.53, 2.01)  |
| 0.28<br>(0.12, 0.63) | 0.24<br>(0.09, 0.59) | 0.39<br>(0.18, 0.78) | 0.99<br>(0.5, 1.88)  | Suptavumab            |



**Appendix table S36: Bayesian league table of rate of supplemental oxygen use in random effects model**

|                       |                       |                       |                        |
|-----------------------|-----------------------|-----------------------|------------------------|
| Motavizumab           | 1.04<br>(0.02, 54.33) | 1.55<br>(0.1, 24.05)  | 8.84<br>(0.57, 135.5)  |
| 0.96<br>(0.02, 52.12) | Nirsevimab            | 1.5<br>(0.01, 191.09) | 8.43<br>(0.49, 154.15) |
| 0.64<br>(0.04, 9.81)  | 0.67<br>(0.01, 84.42) | Palivizumab           | 5.68<br>(0.12, 270.02) |
| 0.11<br>(0.01, 1.75)  | 0.12<br>(0.01, 2.06)  | 0.18<br>(0, 8.5)      | Placebo                |

**Appendix table S37: Bayesian league table of rate of supplemental oxygen use in fixed effects model**

|                      |                      |                      |                       |
|----------------------|----------------------|----------------------|-----------------------|
| Motavizumab          | 1.06<br>(0.26, 3.45) | 1.56<br>(0.95, 2.6)  | 8.79<br>(5.37, 15.11) |
| 0.94<br>(0.29, 3.82) | Nirsevimab           | 1.48<br>(0.41, 6.49) | 8.27<br>(2.91, 30.8)  |
| 0.64<br>(0.38, 1.05) | 0.68<br>(0.15, 2.45) | Palivizumab          | 5.65<br>(2.77, 11.7)  |
| 0.11<br>(0.07, 0.19) | 0.12<br>(0.03, 0.34) | 0.18<br>(0.09, 0.36) | Placebo               |

**Appendix table S38: Bayesian league table of rate of mechanical ventilation use in random effects model**

|                                        |                 |                                          |                                          |
|----------------------------------------|-----------------|------------------------------------------|------------------------------------------|
| Motavizumab                            | 0<br>(0, 11.96) | 5.03<br>(0.63, 45.73)                    | 7.7<br>(0.74, 83.84)                     |
| 24058.21<br>(0.08, 855629723170699904) | Nirsevimab      | 122529.85<br>(0.48, 4252162126839230976) | 183653.94<br>(0.87, 5821885953627409408) |
| 0.2<br>(0.02, 1.59)                    | 0<br>(0, 2.1)   | Palivizumab                              | 1.54<br>(0.21, 10.2)                     |
| 0.13<br>(0.01, 1.35)                   | 0<br>(0, 1.16)  | 0.65<br>(0.1, 4.82)                      | Placebo                                  |

**Appendix table S39: Bayesian league table of rate of mechanical ventilation use in fixed effects model**

|                                       |                |                                         |                                         |
|---------------------------------------|----------------|-----------------------------------------|-----------------------------------------|
| Motavizumab                           | 0<br>(0, 7.71) | 4.96<br>(1.52, 23.27)                   | 8.27<br>(2.12, 43.62)                   |
| 26691.14<br>(0.13, 56102833244432992) | Nirsevimab     | 138661.44<br>(0.76, 309977006714859136) | 227408.63<br>(1.31, 518393465197570240) |
| 0.2<br>(0.04, 0.66)                   | 0<br>(0, 1.32) | Palivizumab                             | 1.64<br>(0.72, 3.96)                    |
| 0.12<br>(0.02, 0.47)                  | 0<br>(0, 0.76) | 0.61<br>(0.25, 1.4)                     | Placebo                                 |

**Appendix table S40: Bayesian league table of rate of ICU admission in random effects model**

|                                             |                |                                                |                                                 |
|---------------------------------------------|----------------|------------------------------------------------|-------------------------------------------------|
| Motavizumab                                 | 0<br>(0, 0.35) | 2.53<br>(0.17, 54.84)                          | 6.12<br>(0.4, 191.16)                           |
| 5847429934.38<br>(2.86, 1.673431187075e+26) | Nirsevimab     | 15616450915.69<br>(8.23, 4.51961657999075e+26) | 40371913834.37<br>(25.82, 1.03437981491577e+27) |
| 0.4<br>(0.02, 5.99)                         | 0<br>(0, 0.12) | Palivizumab                                    | 2.39<br>(0.16, 50.19)                           |
| 0.16<br>(0.01, 2.5)                         | 0<br>(0, 0.04) | 0.42<br>(0.02, 6.26)                           | Placebo                                         |

**Appendix table S41: Bayesian league table of rate of ICU admission in fixed effects model**

|                                                |                |                                                  |                                                   |
|------------------------------------------------|----------------|--------------------------------------------------|---------------------------------------------------|
| Motavizumab                                    | 0<br>(0, 0.14) | 2.22<br>(1.1, 4.81)                              | 4.66<br>(1.92, 12.04)                             |
| 217989677350.61<br>(6.9, 1.01180718649146e+31) | Nirsevimab     | 490291654606.98<br>(15.84, 2.24726925127156e+31) | 1025081497855.31<br>(33.16, 4.47461804254501e+31) |
| 0.45<br>(0.21, 0.91)                           | 0<br>(0, 0.06) | Palivizumab                                      | 2.08<br>(1.1, 4.17)                               |
| 0.21<br>(0.08, 0.52)                           | 0<br>(0, 0.03) | 0.48<br>(0.24, 0.91)                             | Placebo                                           |

**Appendix table S42: Bayesian league table of drug-related adverse events in random effects model**

|                      |                      |                      |                      |                      |                      |
|----------------------|----------------------|----------------------|----------------------|----------------------|----------------------|
| M+P                  | 1.32<br>(0.43, 3.99) | 1.34<br>(0.23, 8.62) | 1.29<br>(0.32, 4.76) | 1.25<br>(0.24, 5.96) | 1.27<br>(0.18, 8.34) |
| 0.76<br>(0.25, 2.32) | Motavizumab          | 1.02<br>(0.26, 4.49) | 0.98<br>(0.43, 2.04) | 0.95<br>(0.29, 2.9)  | 0.96<br>(0.19, 4.45) |
| 0.75<br>(0.12, 4.3)  | 0.98<br>(0.22, 3.92) | Nirsevimab           | 0.96<br>(0.26, 2.93) | 0.93<br>(0.37, 2.02) | 0.95<br>(0.23, 3.38) |
| 0.78<br>(0.21, 3.17) | 1.02<br>(0.49, 2.34) | 1.04<br>(0.34, 3.82) | Palivizumab          | 0.97<br>(0.42, 2.32) | 0.99<br>(0.26, 3.93) |
| 0.8<br>(0.17, 4.13)  | 1.06<br>(0.34, 3.48) | 1.07<br>(0.49, 2.69) | 1.03<br>(0.43, 2.4)  | Placebo              | 1.02<br>(0.35, 2.93) |
| 0.79<br>(0.12, 5.58) | 1.04<br>(0.22, 5.15) | 1.05<br>(0.3, 4.39)  | 1.01<br>(0.25, 3.91) | 0.99<br>(0.34, 2.83) | Suptavumab           |

**Appendix table S43: Bayesian league table of drug-related adverse events in fixed effects model**

|                      |                      |                      |                      |                      |                      |
|----------------------|----------------------|----------------------|----------------------|----------------------|----------------------|
| M+P                  | 1.32<br>(0.69, 2.46) | 1.34<br>(0.48, 3.75) | 1.33<br>(0.64, 2.74) | 1.29<br>(0.55, 2.96) | 1.31<br>(0.49, 3.49) |
| 0.76<br>(0.41, 1.44) | Motavizumab          | 1.01<br>(0.46, 2.29) | 1.01<br>(0.7, 1.45)  | 0.98<br>(0.56, 1.69) | 0.99<br>(0.47, 2.12) |
| 0.75<br>(0.27, 2.09) | 0.99<br>(0.44, 2.18) | Nirsevimab           | 1<br>(0.48, 2.02)    | 0.97<br>(0.53, 1.71) | 0.98<br>(0.45, 2.13) |
| 0.75<br>(0.36, 1.57) | 0.99<br>(0.69, 1.42) | 1<br>(0.49, 2.09)    | Palivizumab          | 0.97<br>(0.64, 1.46) | 0.98<br>(0.51, 1.92) |
| 0.78<br>(0.34, 1.8)  | 1.02<br>(0.59, 1.77) | 1.03<br>(0.58, 1.9)  | 1.03<br>(0.68, 1.56) | Placebo              | 1.01<br>(0.61, 1.72) |
| 0.76<br>(0.29, 2.04) | 1.01<br>(0.47, 2.13) | 1.02<br>(0.47, 2.24) | 1.02<br>(0.52, 1.95) | 0.99<br>(0.58, 1.63) | Suptavumab           |



**Appendix table S44: Bayesian league table of drug-related serious adverse events in random effects model**

|                            |                            |                                        |                           |                           |
|----------------------------|----------------------------|----------------------------------------|---------------------------|---------------------------|
| M+P                        | 0.71<br>(0.01, 48.35)      | 20222.9<br>(0, 1.84127748263721e+29)   | 0.17<br>(0, 26.53)        | 0.25<br>(0, 61.71)        |
| 1.4<br>(0.02, 147.72)      | Motavizumab                | 31979.62<br>(0, 2.1964172568143e+29)   | 0.25<br>(0.01, 4.39)      | 0.37<br>(0.01, 12.1)      |
| 0<br>(0, 2985881300883712) | 0<br>(0, 1697149564964730) | Nirsevimab                             | 0<br>(0, 433416757509325) | 0<br>(0, 511717295620109) |
| 5.97<br>(0.04, 2028)       | 4.07<br>(0.23, 132.29)     | 142821.12<br>(0, 1.04766699009681e+30) | Palivizumab               | 1.41<br>(0.04, 84.76)     |
| 4.02<br>(0.02, 1803.64)    | 2.68<br>(0.08, 151.91)     | 94516.74<br>(0, 5.53272420784994e+29)  | 0.71<br>(0.01, 24.09)     | Placebo                   |

**Appendix table S45: Bayesian league table of drug-related serious adverse events in fixed effects model**

|                            |                           |                                       |                           |                           |
|----------------------------|---------------------------|---------------------------------------|---------------------------|---------------------------|
| M+P                        | 0.74<br>(0.02, 9.58)      | 14312.42<br>(0, 6.39254240399028e+28) | 0.45<br>(0.01, 7.68)      | 0.33<br>(0.01, 6.43)      |
| 1.35<br>(0.1, 44.04)       | Motavizumab               | 21367.07<br>(0, 8.86040823969649e+28) | 0.63<br>(0.18, 1.96)      | 0.47<br>(0.09, 1.88)      |
| 0<br>(0, 1347470867106858) | 0<br>(0, 784023877300891) | Nirsevimab                            | 0<br>(0, 504596108636899) | 0<br>(0, 346926025479572) |
| 2.2<br>(0.13, 84.25)       | 1.59<br>(0.51, 5.41)      | 33999.92<br>(0, 1.38689577917869e+29) | Palivizumab               | 0.74<br>(0.13, 3.63)      |
| 3.03<br>(0.16, 134.87)     | 2.12<br>(0.53, 11.6)      | 47959.76<br>(0, 1.86085058214622e+29) | 1.35<br>(0.28, 7.75)      | Placebo                   |

Appendix table S46: details of continuous outcomes

| First author, year                                                     | Intervention | Comparison  | Participants (I/C) | mean (I) | mean (C) |
|------------------------------------------------------------------------|--------------|-------------|--------------------|----------|----------|
| <b>Duration of MV use (total days/100 children)</b>                    |              |             |                    |          |          |
| O'Brien KL, 2015                                                       | Motavizumab  | Placebo     | 1417/710           | 0.21     | 1.83     |
| Carbonell-Estrany, 2010                                                | Motavizumab  | Palivizumab | 3329/3306          | 0.5      | 3.8      |
| Feltes, 2003                                                           | Palivizumab  | Placebo     | 639/648            | 6.5      | 54.7     |
| <b>Duration of RSV-related hospital stay (total days/100 children)</b> |              |             |                    |          |          |
| O'Brien KL, 2015                                                       | Motavizumab  | Placebo     | 1417/710           | 7.41     | 52.96    |
| Carbonell-Estrany, 2010                                                | Motavizumab  | Palivizumab | 3329/3306          | 9.1      | 18.1     |
| Feltes, 2003                                                           | Palivizumab  | Placebo     | 639/648            | 57.4     | 129      |
| Griffin MP, 2020                                                       | Nirsevimab   | Placebo     | 969/484            | 5.37     | 28.93    |
| <b>Duration of RSV ICU stay (total days/100 children)</b>              |              |             |                    |          |          |
| O'Brien KL, 2015                                                       | Motavizumab  | Placebo     | 1417/710           | 0.28     | 3.66     |
| Carbonell-Estrany, 2010                                                | Motavizumab  | Palivizumab | 3329/3306          | 2        | 6.3      |
| Feltes, 2003                                                           | Palivizumab  | Placebo     | 639/648            | 15.9     | 71.2     |
| <b>Duration of supplemental oxygen use</b>                             |              |             |                    |          |          |
| O'Brien KL, 2015                                                       | Motavizumab  | Placebo     | 1417/710           | 6.28     | 44.93    |
| Carbonell-Estrany, 2010                                                | Motavizumab  | Palivizumab | 3329/3306          | 4.1      | 9.5      |
| Feltes, 2003                                                           | Palivizumab  | Placebo     | 639/648            | 27.9     | 101.5    |

APPENDIX FIGURES

Appendix figure S1: risk of bias assessment

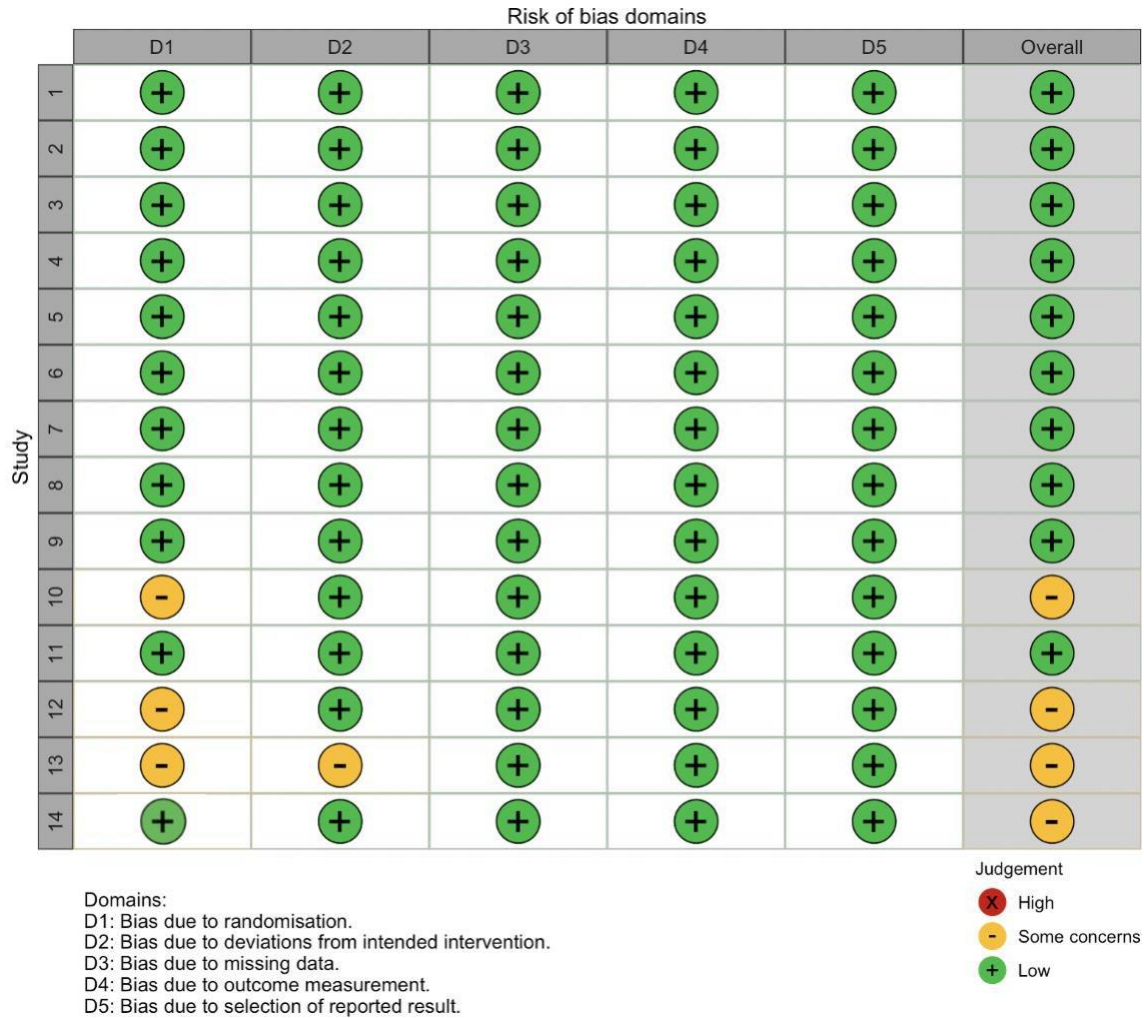

Appendix figure S1-1: risk of bias assessment for dichotomous outcome

|       |    | Risk of bias domains |    |    |    |    |         |
|-------|----|----------------------|----|----|----|----|---------|
|       |    | D1                   | D2 | D3 | D4 | D5 | Overall |
| Study | 2  | +                    | +  | +  | +  | -  | -       |
|       | 3  | +                    | +  | +  | +  | +  | +       |
|       | 4  | +                    | +  | +  | +  | +  | +       |
|       | 5  | +                    | +  | +  | +  | +  | +       |
|       | 6  | +                    | +  | +  | +  | +  | +       |
|       | 7  | +                    | +  | +  | +  | -  | -       |
|       | 8  | +                    | +  | +  | +  | -  | -       |
|       | 9  | +                    | +  | +  | +  | +  | +       |
|       | 10 | -                    | +  | +  | +  | +  | -       |
|       | 11 | +                    | +  | +  | +  | +  | +       |
|       | 12 | -                    | +  | +  | +  | +  | -       |
|       | 13 | -                    | -  | +  | +  | +  | -       |
|       | 14 | +                    | +  | +  | +  | +  | -       |

Domains:  
D1: Bias due to randomisation.  
D2: Bias due to deviations from intended intervention.  
D3: Bias due to missing data.  
D4: Bias due to outcome measurement.  
D5: Bias due to selection of reported result.

Judgement  
 High  
 Some concerns  
 Low

Appendix figure S1-2: risk of bias assessment for continuous outcome

**Appendix figure S2-S9: network plots**

Network plot comparing mAbs in preventing RSV in children. The line width is proportional to the number of studies comparing each pair of interventions, and the size of each node is proportional to the number of participants (sample size).

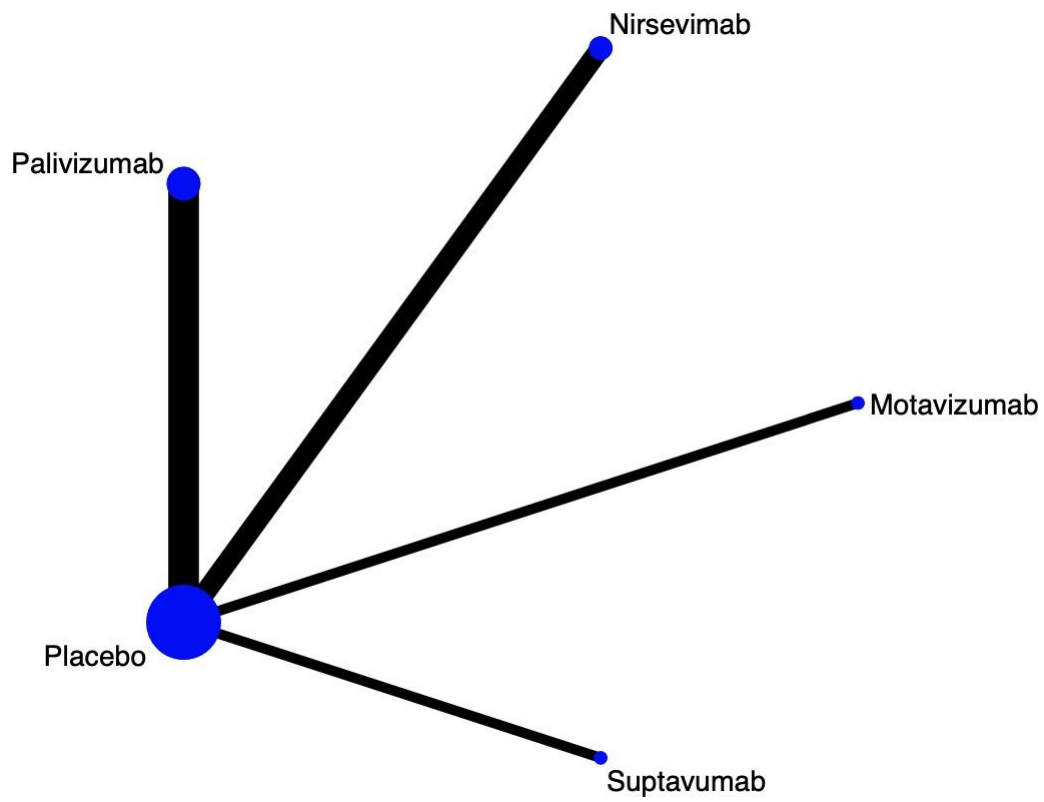

Appendix figure S2: network plot of rate of RSV infection

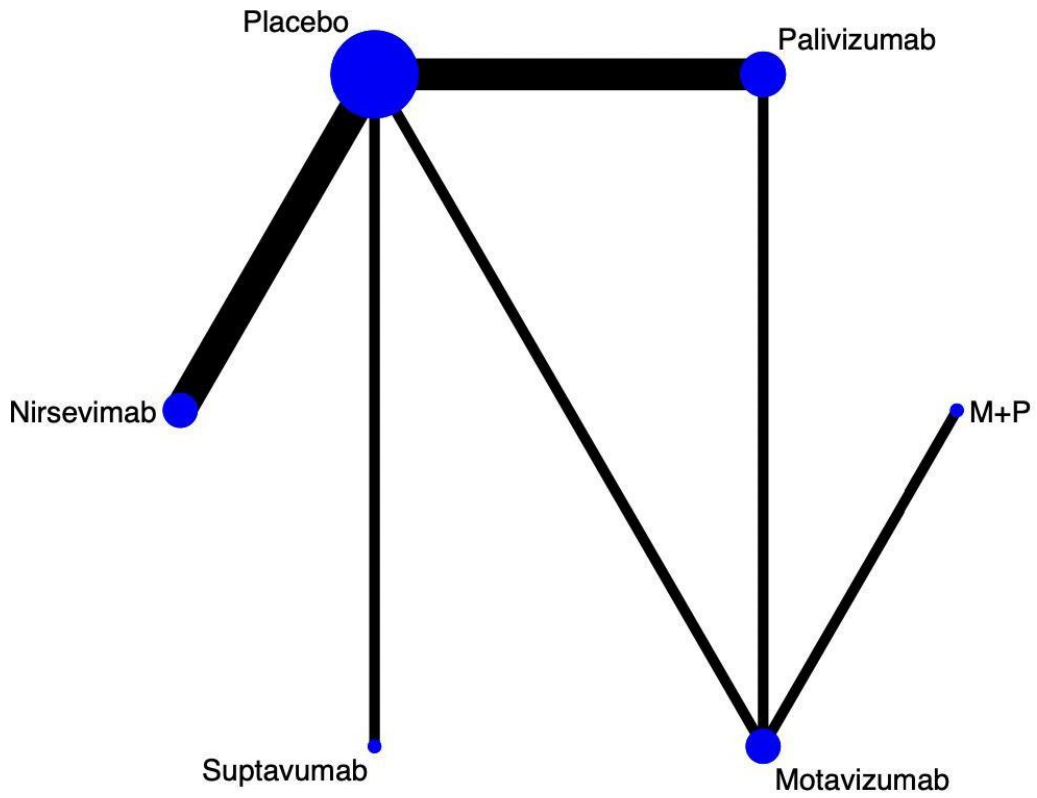

Appendix figure S3: network plot of all-cause mortality

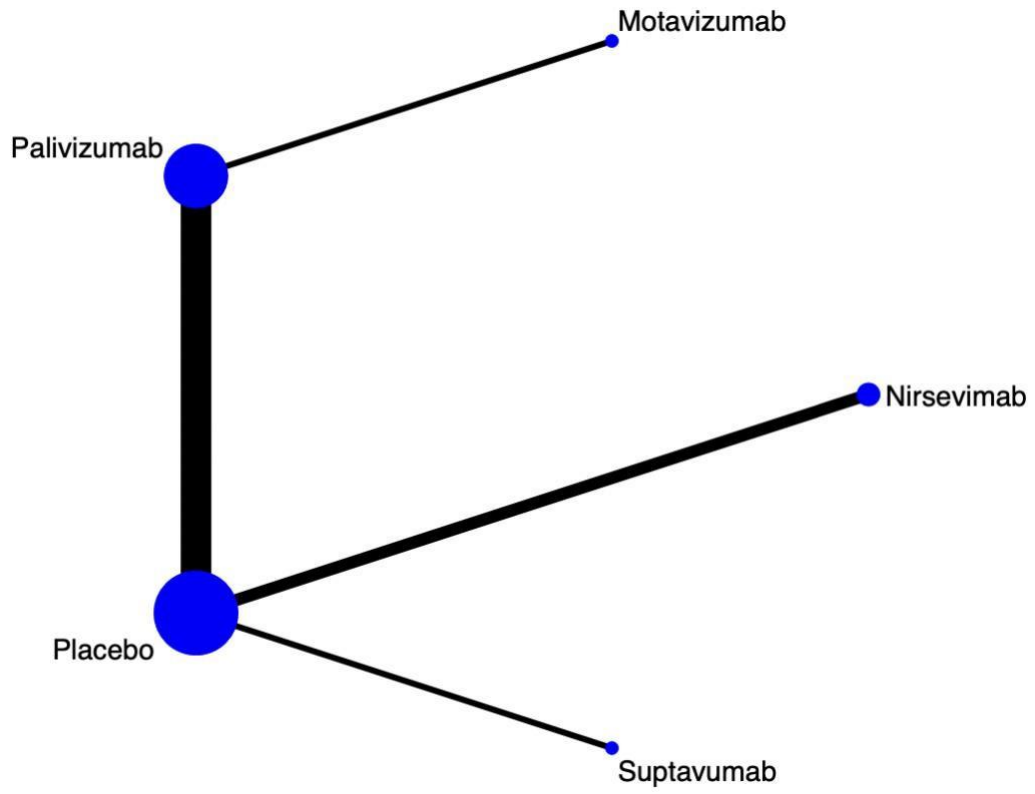

Appendix figure S4: network plot of RSV-related hospitalization



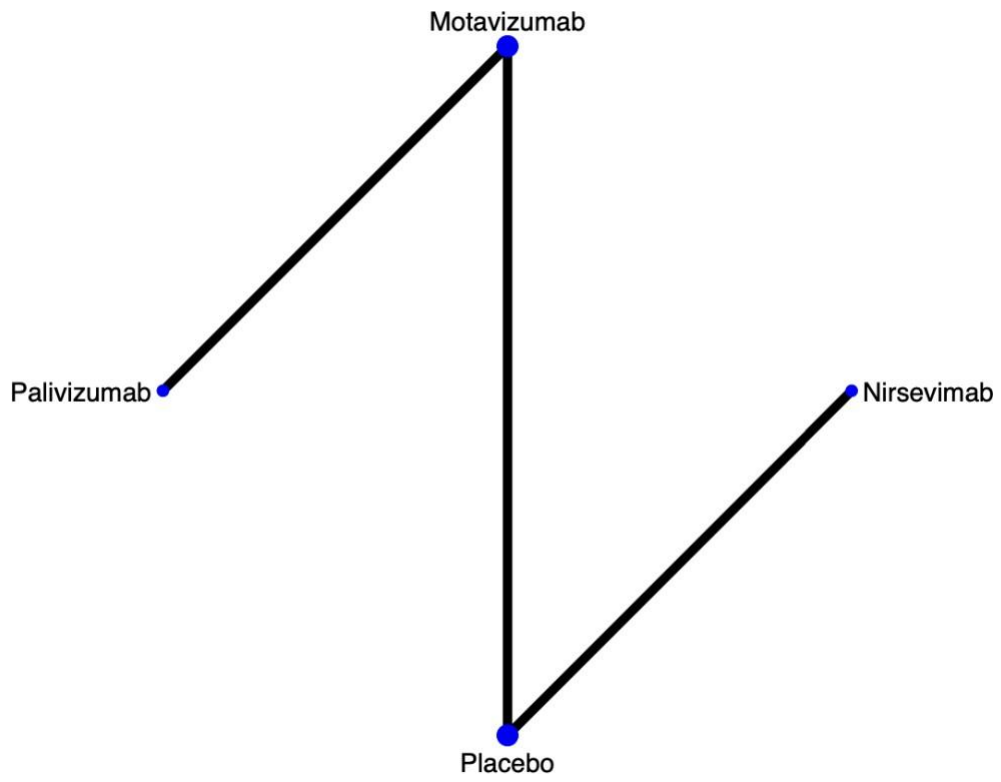

Appendix figure S5: network plot of supplemental oxygen use

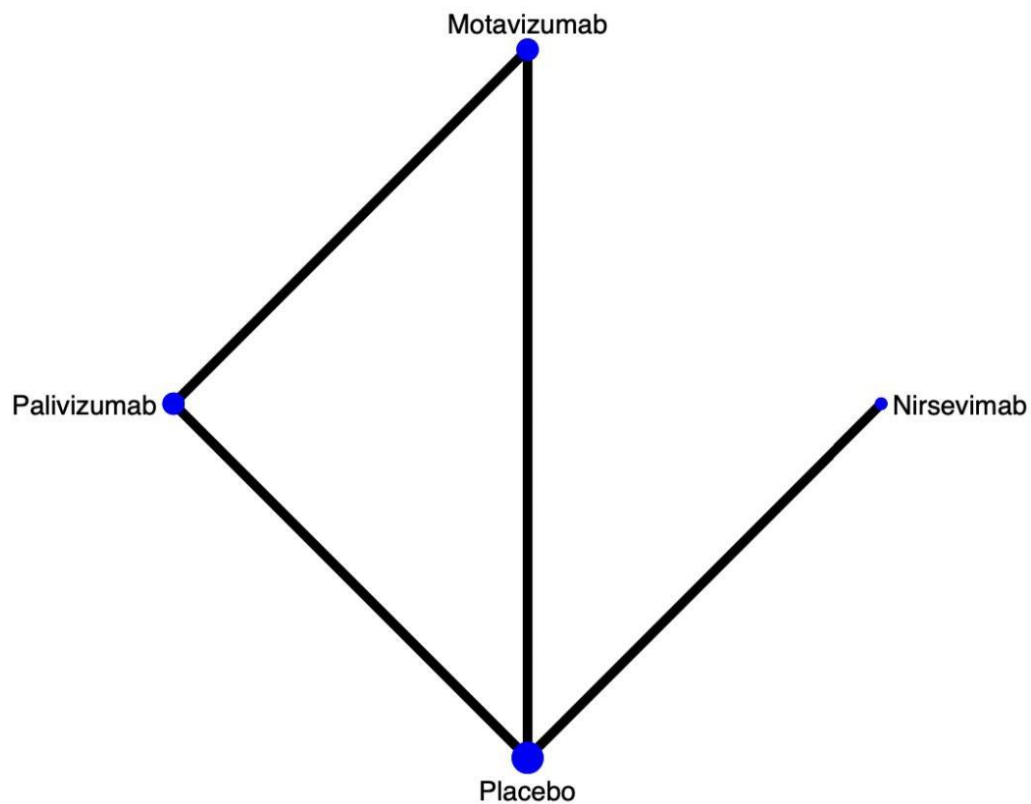

Appendix figure S6: network plot of rate of mechanical ventilation use

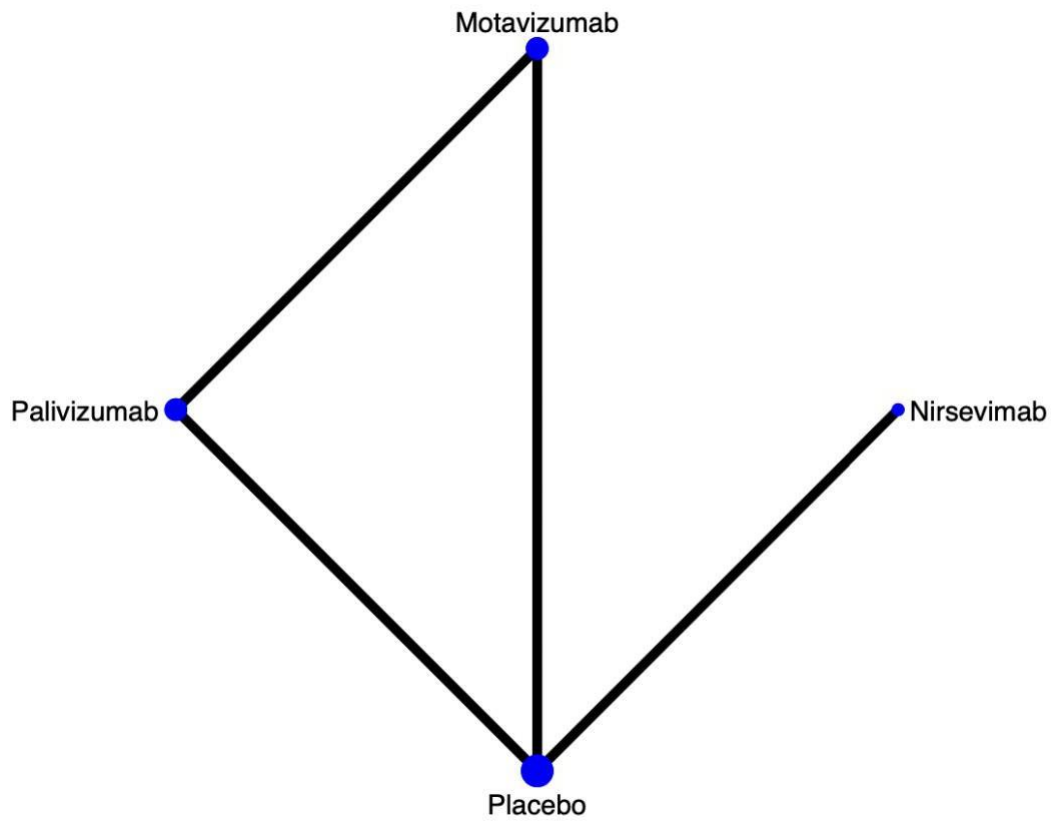

Appendix figure S7: network plot of rate of ICU admission

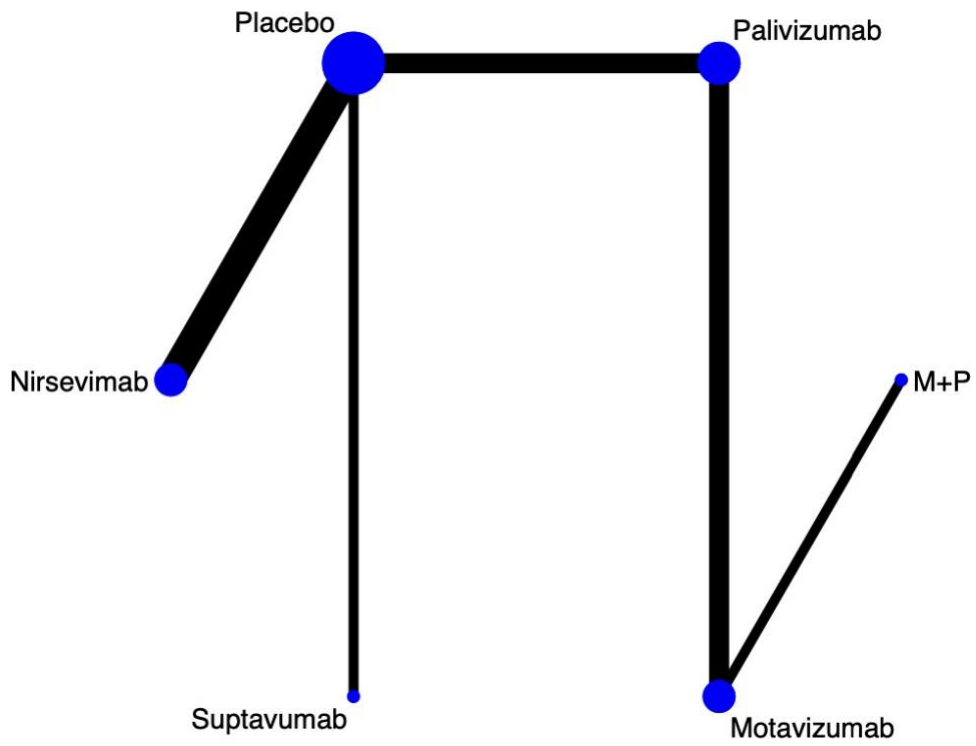

Appendix figure S8: network plot of drug-related adverse events

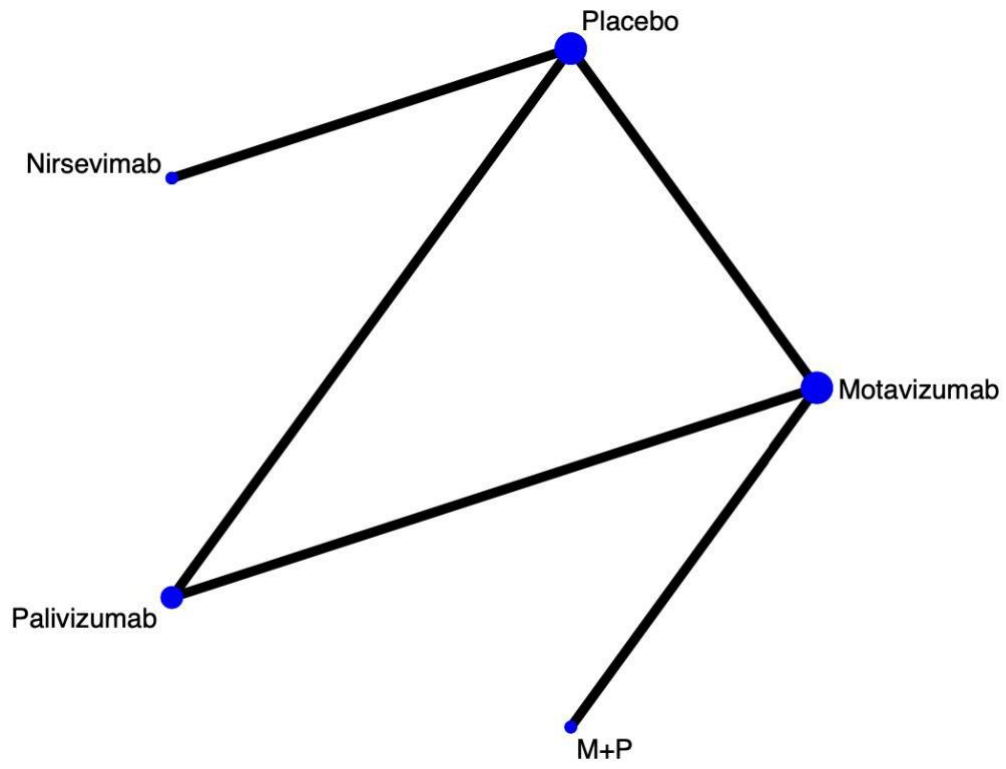

Appendix figure S9: network plot of drug-related serious adverse events

Appendix figure S10-S15: forest plots of all-cause mortality in pairwise meta-analysis

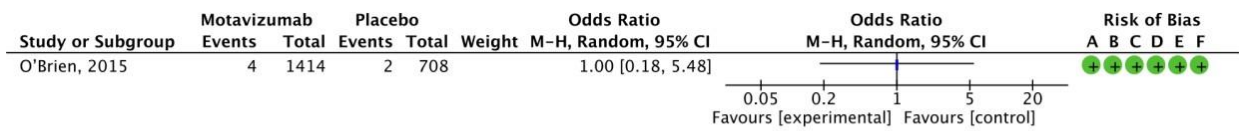

Risk of bias legend

- (A) Bias from the randomization process generated
- (B) Bias due to deviations from the intended intervention
- (C) Bias due to missing data
- (D) Bias due to measurement of the outcome
- (E) Bias in selection of the reported results
- (F) Overall

Appendix figure S10: results of motavizumab compared with placebo in all-cause mortality

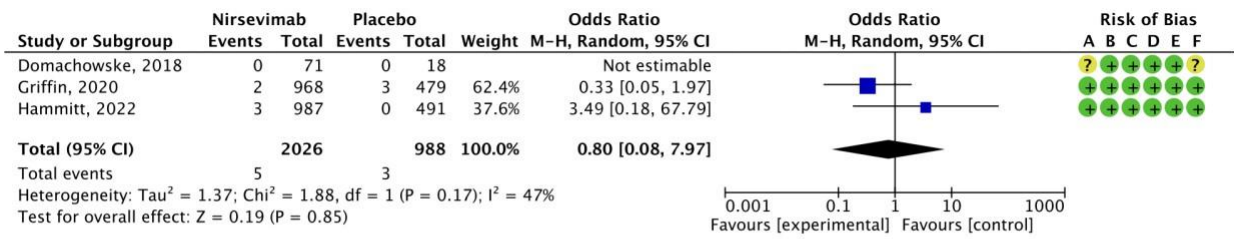

Risk of bias legend

- (A) Bias from the randomization process generated
- (B) Bias due to deviations from the intended intervention
- (C) Bias due to missing data
- (D) Bias due to measurement of the outcome
- (E) Bias in selection of the reported results
- (F) Overall

Appendix figure S11: results of nirsevimab compared with placebo in all-cause mortality

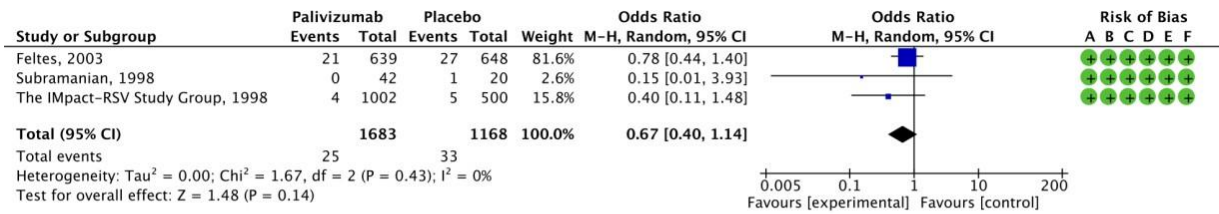

Risk of bias legend

- (A) Bias from the randomization process generated
- (B) Bias due to deviations from the intended intervention
- (C) Bias due to missing data
- (D) Bias due to measurement of the outcome
- (E) Bias in selection of the reported results
- (F) Overall

Appendix figure S12: results of palivizumab compared with placebo in all-cause mortality



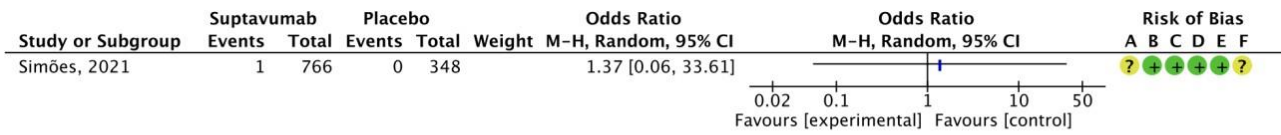

Risk of bias legend

- (A) Bias from the randomization process generated
- (B) Bias due to deviations from the intended intervention
- (C) Bias due to missing data
- (D) Bias due to measurement of the outcome
- (E) Bias in selection of the reported results
- (F) Overall

Appendix figure S13: results of suptavumab compared with placebo in all-cause mortality

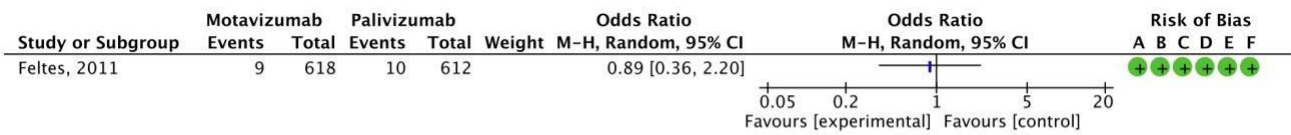

Risk of bias legend

- (A) Bias from the randomization process generated
- (B) Bias due to deviations from the intended intervention
- (C) Bias due to missing data
- (D) Bias due to measurement of the outcome
- (E) Bias in selection of the reported results
- (F) Overall

Appendix figure S14: results of motavizumab compared with palivizumab in all-cause mortality

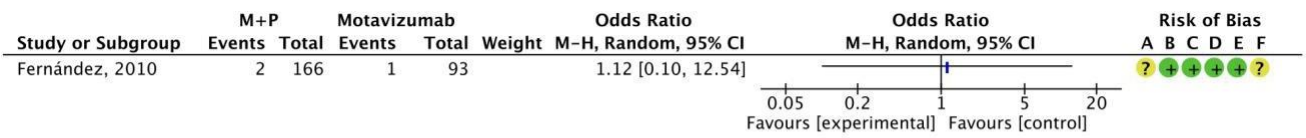

**Risk of bias legend**

- (A) Bias from the randomization process generated
- (B) Bias due to deviations from the intended intervention
- (C) Bias due to missing data
- (D) Bias due to measurement of the outcome
- (E) Bias in selection of the reported results
- (F) Overall

Appendix figure S15: results of motavizumab in combination with palivizumab compared with motavizumab in all-cause mortality

Appendix figure S16-S20: forest plots of drug-related adverse events in pairwise meta-analysis

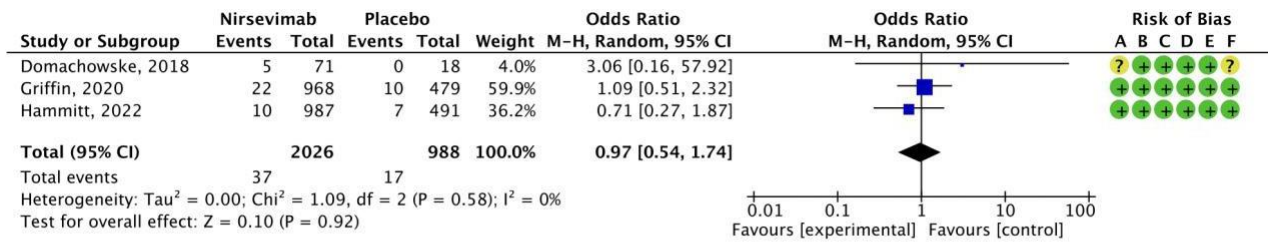

Risk of bias legend

- (A) Bias from the randomization process generated
- (B) Bias due to deviations from the intended intervention
- (C) Bias due to missing data
- (D) Bias due to measurement of the outcome
- (E) Bias in selection of the reported results
- (F) Overall

Appendix figure S16: results of nirsevimab compared with placebo in drug-related adverse events

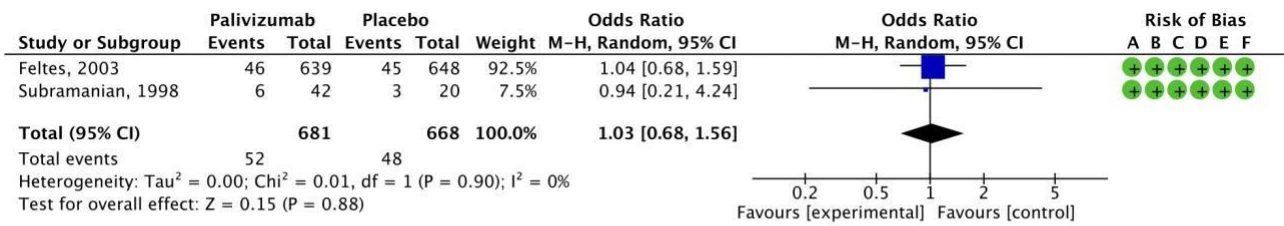

Risk of bias legend

- (A) Bias from the randomization process generated
- (B) Bias due to deviations from the intended intervention
- (C) Bias due to missing data
- (D) Bias due to measurement of the outcome
- (E) Bias in selection of the reported results
- (F) Overall

Appendix figure S17: results of palivizumab compared with placebo in drug-related adverse events

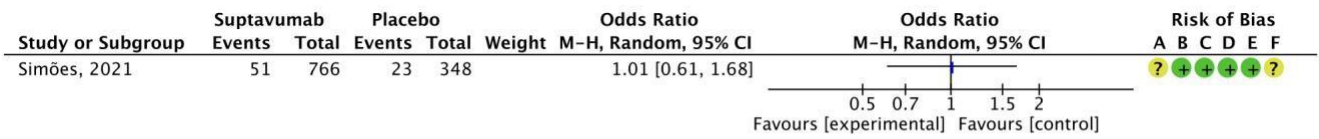

Risk of bias legend

- (A) Bias from the randomization process generated
- (B) Bias due to deviations from the intended intervention
- (C) Bias due to missing data
- (D) Bias due to measurement of the outcome
- (E) Bias in selection of the reported results
- (F) Overall

Appendix figure S18: results of suptavumab compared with placebo in drug-related adverse events

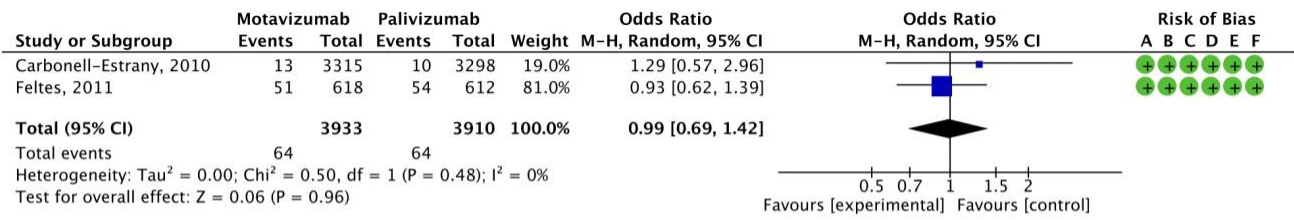

**Risk of bias legend**

- (A) Bias from the randomization process generated
- (B) Bias due to deviations from the intended intervention
- (C) Bias due to missing data
- (D) Bias due to measurement of the outcome
- (E) Bias in selection of the reported results
- (F) Overall

Appendix figure S19: results of motavizumab compared with palivizumab in drug-related adverse events

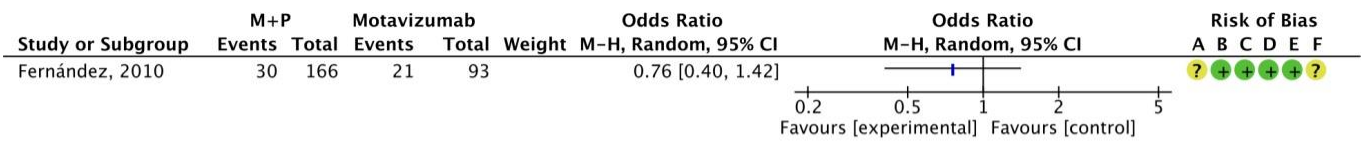

Risk of bias legend

- (A) Bias from the randomization process generated
- (B) Bias due to deviations from the intended intervention
- (C) Bias due to missing data
- (D) Bias due to measurement of the outcome
- (E) Bias in selection of the reported results
- (F) Overall

Appendix figure S20: results of motavizumab in combination with palivizumab compared with motavizumab in drug-related adverse events



Appendix figure S21-S25: forest plots of drug-related serious adverse events in pairwise meta-analysis

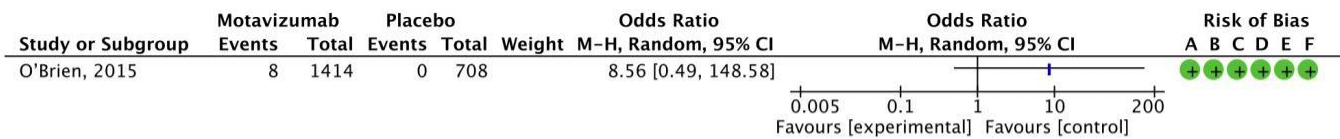

Risk of bias legend

- (A) Bias from the randomization process generated
- (B) Bias due to deviations from the intended intervention
- (C) Bias due to missing data
- (D) Bias due to measurement of the outcome
- (E) Bias in selection of the reported results
- (F) Overall

Appendix figure S21: results of motavizumab compared with placebo in drug-related serious adverse events

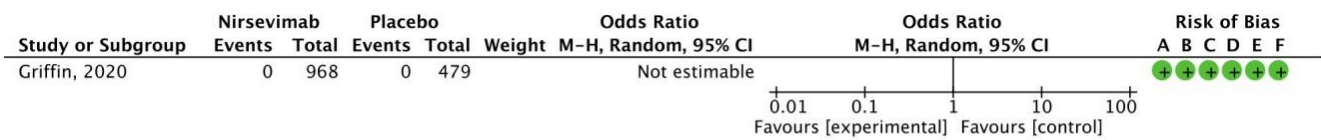

Risk of bias legend

- (A) Bias from the randomization process generated
- (B) Bias due to deviations from the intended intervention
- (C) Bias due to missing data
- (D) Bias due to measurement of the outcome
- (E) Bias in selection of the reported results
- (F) Overall

Appendix figure S22: results of nirsevimab compared with placebo in drug-related serious adverse events

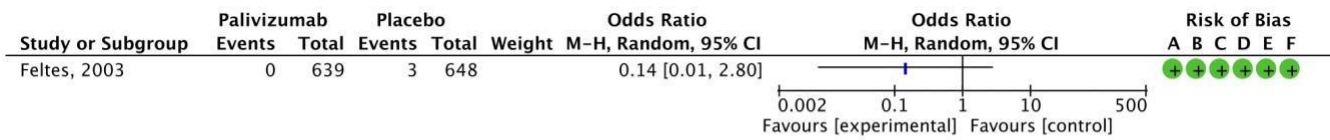

Risk of bias legend

- (A) Bias from the randomization process generated
- (B) Bias due to deviations from the intended intervention
- (C) Bias due to missing data
- (D) Bias due to measurement of the outcome
- (E) Bias in selection of the reported results
- (F) Overall

Appendix figure S23: results of palivizumab compared with placebo in drug-related serious adverse events

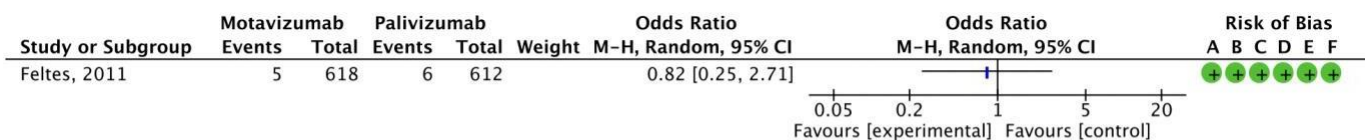

Risk of bias legend

- (A) Bias from the randomization process generated
- (B) Bias due to deviations from the intended intervention
- (C) Bias due to missing data
- (D) Bias due to measurement of the outcome
- (E) Bias in selection of the reported results
- (F) Overall

Appendix figure S24: results of motavizumab compared with palivizumab in drug-related serious adverse events

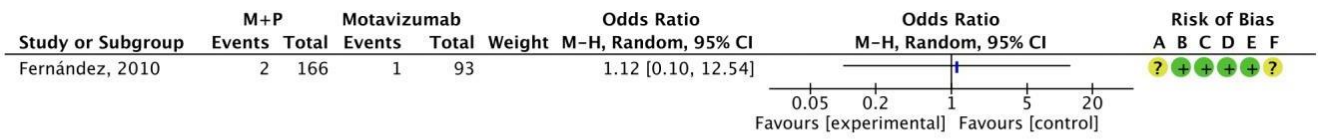

**Risk of bias legend**

- (A) Bias from the randomization process generated
- (B) Bias due to deviations from the intended intervention
- (C) Bias due to missing data
- (D) Bias due to measurement of the outcome
- (E) Bias in selection of the reported results
- (F) Overall

Appendix figure S25: results of motavizumab in combination with palivizumab compared with motavizumab in drug-related serious adverse events

Appendix figure S26-S29: forest plots of rate of RSV-related hospitalization in pairwise meta-analysis

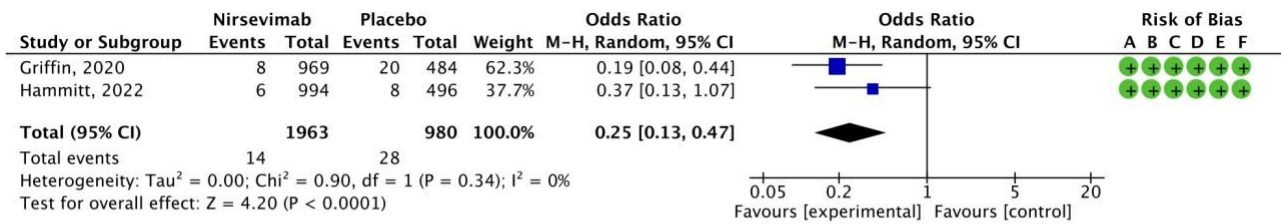

Risk of bias legend

- (A) Bias from the randomization process generated
- (B) Bias due to deviations from the intended intervention
- (C) Bias due to missing data
- (D) Bias due to measurement of the outcome
- (E) Bias in selection of the reported results
- (F) Overall

Appendix figure S26: results of nirsevimab compared with placebo in RSV-related hospitalization

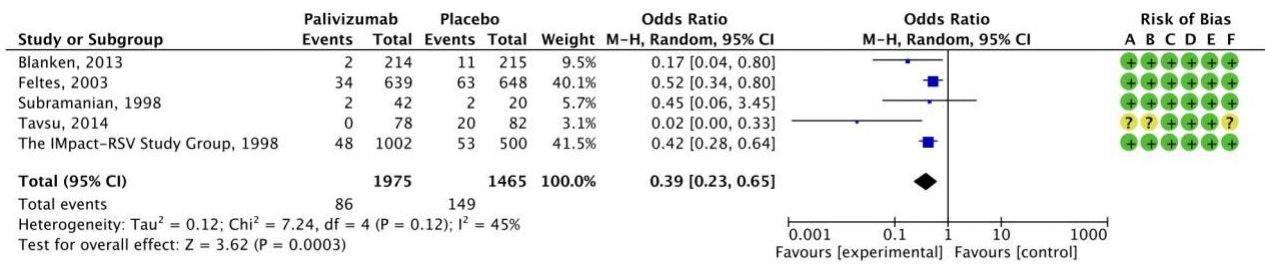

**Risk of bias legend**

- (A) Bias from the randomization process generated
- (B) Bias due to deviations from the intended intervention
- (C) Bias due to missing data
- (D) Bias due to measurement of the outcome
- (E) Bias in selection of the reported results
- (F) Overall

Appendix figure S27: results of palivizumab compared with placebo in RSV-related hospitalization

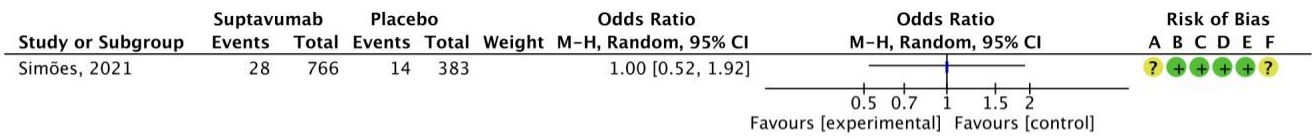

**Risk of bias legend**

- (A) Bias from the randomization process generated
- (B) Bias due to deviations from the intended intervention
- (C) Bias due to missing data
- (D) Bias due to measurement of the outcome
- (E) Bias in selection of the reported results
- (F) Overall

Appendix figure S28: results of suptavumab compared with placebo in RSV-related hospitalization



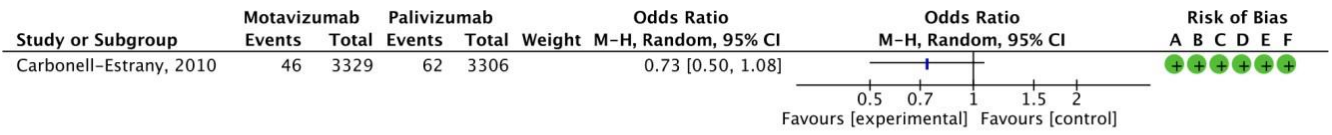

Risk of bias legend

- (A) Bias from the randomization process generated
- (B) Bias due to deviations from the intended intervention
- (C) Bias due to missing data
- (D) Bias due to measurement of the outcome
- (E) Bias in selection of the reported results
- (F) Overall

Appendix figure S29: results of motavizumab compared with palivizumab in RSV-related hospitalization

Appendix figure S30-S33: forest plots of rate of RSV infection in pairwise meta-analysis

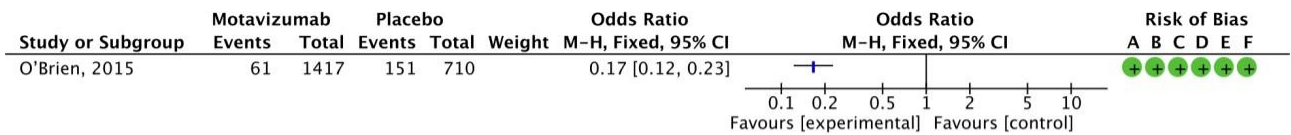

Risk of bias legend

- (A) Bias from the randomization process generated
- (B) Bias due to deviations from the intended intervention
- (C) Bias due to missing data
- (D) Bias due to measurement of the outcome
- (E) Bias in selection of the reported results
- (F) Overall

Appendix figure S30: results of motavizumab compared with placebo in RSV infection

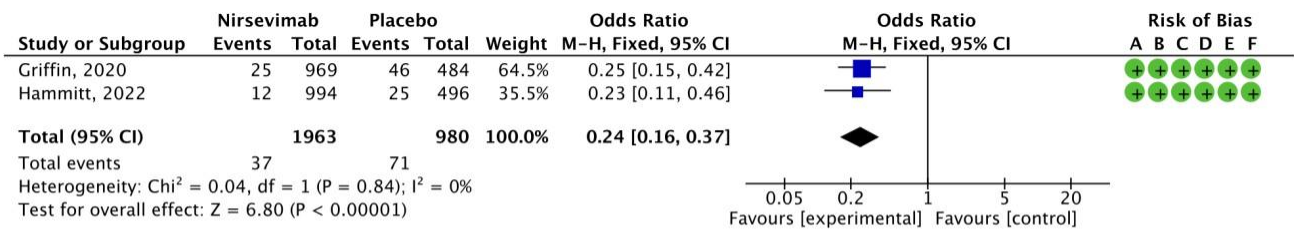

Risk of bias legend

- (A) Bias from the randomization process generated
- (B) Bias due to deviations from the intended intervention
- (C) Bias due to missing data
- (D) Bias due to measurement of the outcome
- (E) Bias in selection of the reported results
- (F) Overall

Appendix figure S31: results of nirsevimab compared with placebo in RSV infection

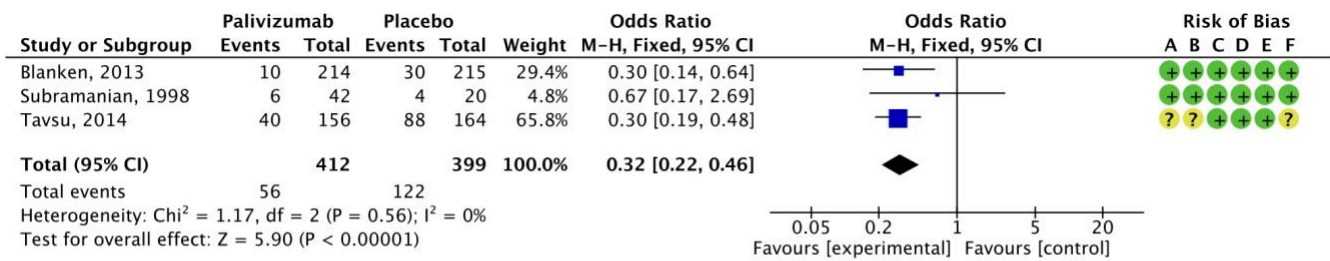

**Risk of bias legend**

- (A) Bias from the randomization process generated
- (B) Bias due to deviations from the intended intervention
- (C) Bias due to missing data
- (D) Bias due to measurement of the outcome
- (E) Bias in selection of the reported results
- (F) Overall

Appendix figure S32: results of palivizumab compared with placebo in RSV infection

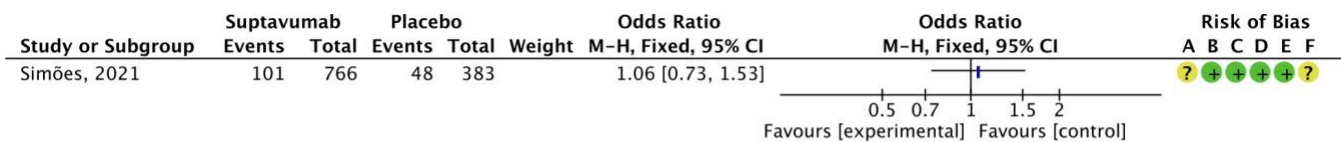

Risk of bias legend

- (A) Bias from the randomization process generated
- (B) Bias due to deviations from the intended intervention
- (C) Bias due to missing data
- (D) Bias due to measurement of the outcome
- (E) Bias in selection of the reported results
- (F) Overall

Appendix figure S33: results of suptavumab compared with placebo in RSV infection

Appendix figure S34-S36: forest plots of rate of supplemental oxygen use in pairwise meta-analysis

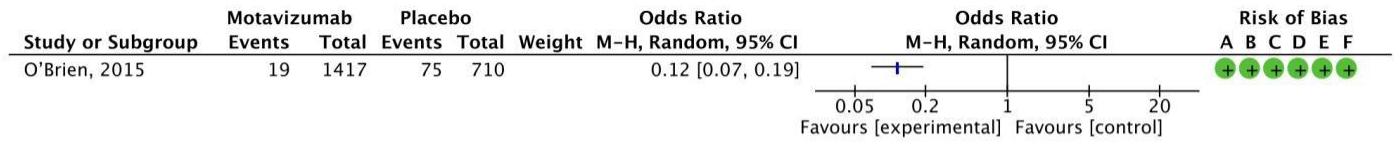

Risk of bias legend

- (A) Bias from the randomization process generated
- (B) Bias due to deviations from the intended intervention
- (C) Bias due to missing data
- (D) Bias due to measurement of the outcome
- (E) Bias in selection of the reported results
- (F) Overall

Appendix figure S34: results of motavizumab compared with placebo in supplemental oxygen use

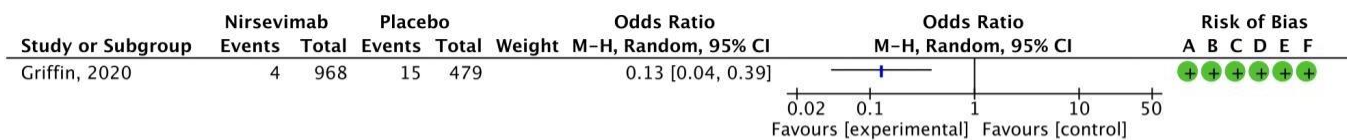

Risk of bias legend

- (A) Bias from the randomization process generated
- (B) Bias due to deviations from the intended intervention
- (C) Bias due to missing data
- (D) Bias due to measurement of the outcome
- (E) Bias in selection of the reported results
- (F) Overall

Appendix figure S35: results of nirsevimab compared with placebo in supplemental oxygen use









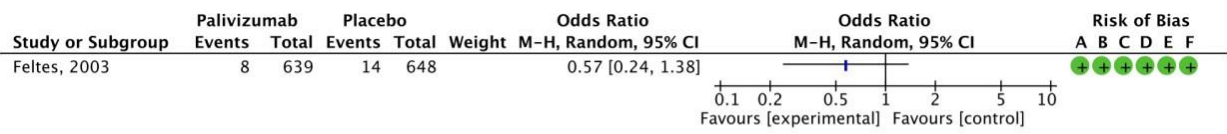

Risk of bias legend

- (A) Bias from the randomization process generated
- (B) Bias due to deviations from the intended intervention
- (C) Bias due to missing data
- (D) Bias due to measurement of the outcome
- (E) Bias in selection of the reported results
- (F) Overall

Appendix figure S39: results of palivizumab compared with placebo in mechanical ventilation use

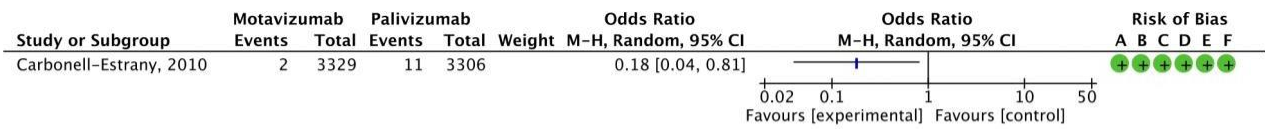

Risk of bias legend

- (A) Bias from the randomization process generated
- (B) Bias due to deviations from the intended intervention
- (C) Bias due to missing data
- (D) Bias due to measurement of the outcome
- (E) Bias in selection of the reported results
- (F) Overall

Appendix figure S40: results of motavizumab compared with palivizumab in mechanical ventilation use

Appendix figure S41-S44: forest plots of rate of ICU admission in pairwise meta-analysis

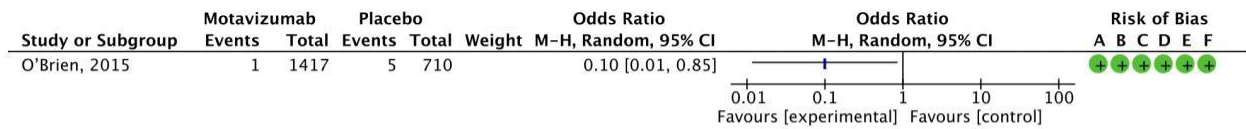

Risk of bias legend

- (A) Bias from the randomization process generated
- (B) Bias due to deviations from the intended intervention
- (C) Bias due to missing data
- (D) Bias due to measurement of the outcome
- (E) Bias in selection of the reported results
- (F) Overall

Appendix figure S41: results of motavizumab compared with placebo in ICU admission

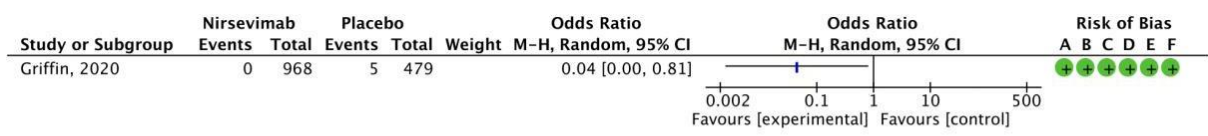

Risk of bias legend

- (A) Bias from the randomization process generated
- (B) Bias due to deviations from the intended intervention
- (C) Bias due to missing data
- (D) Bias due to measurement of the outcome
- (E) Bias in selection of the reported results
- (F) Overall

Appendix figure S42: results of nirsevimab compared with placebo in ICU admission

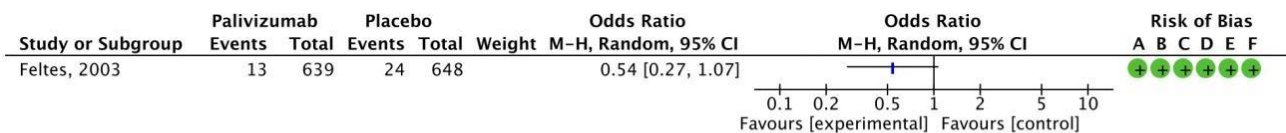

Risk of bias legend

- (A) Bias from the randomization process generated
- (B) Bias due to deviations from the intended intervention
- (C) Bias due to missing data
- (D) Bias due to measurement of the outcome
- (E) Bias in selection of the reported results
- (F) Overall

Appendix figure S43: results of palivizumab compared with placebo in ICU admission

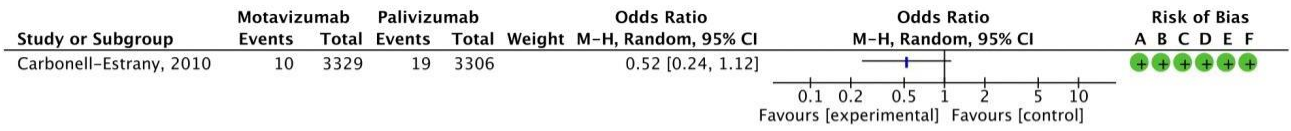

Risk of bias legend

- (A) Bias from the randomization process generated
- (B) Bias due to deviations from the intended intervention
- (C) Bias due to missing data
- (D) Bias due to measurement of the outcome
- (E) Bias in selection of the reported results
- (F) Overall

Appendix figure S44: results of motavizumab compared with palivizumab in ICU admission



Appendix figure S45: funnel plot of all-cause mortality

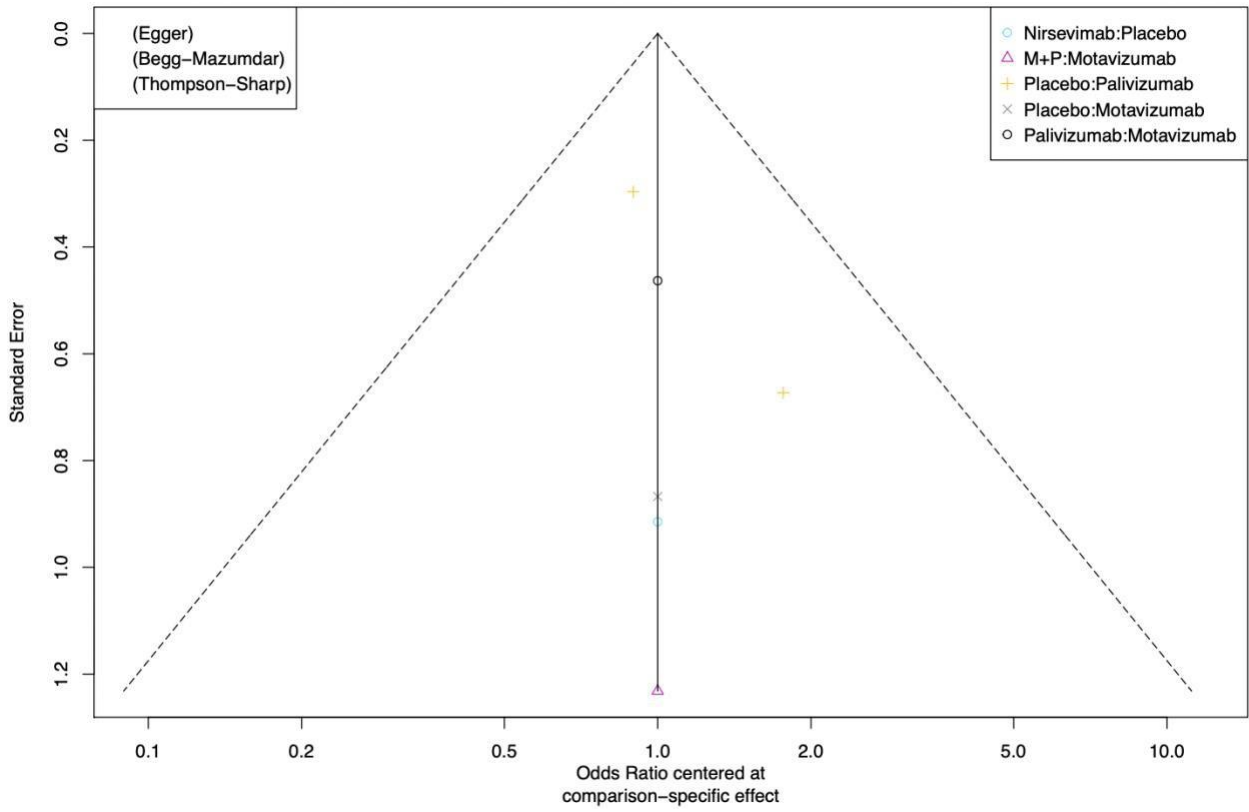

Appendix figure S39: funnel plot of all-cause mortality

Appendix figure S46-S59: node-split plots

The number of the direct evidence column is the P-value to test for differences between groups.

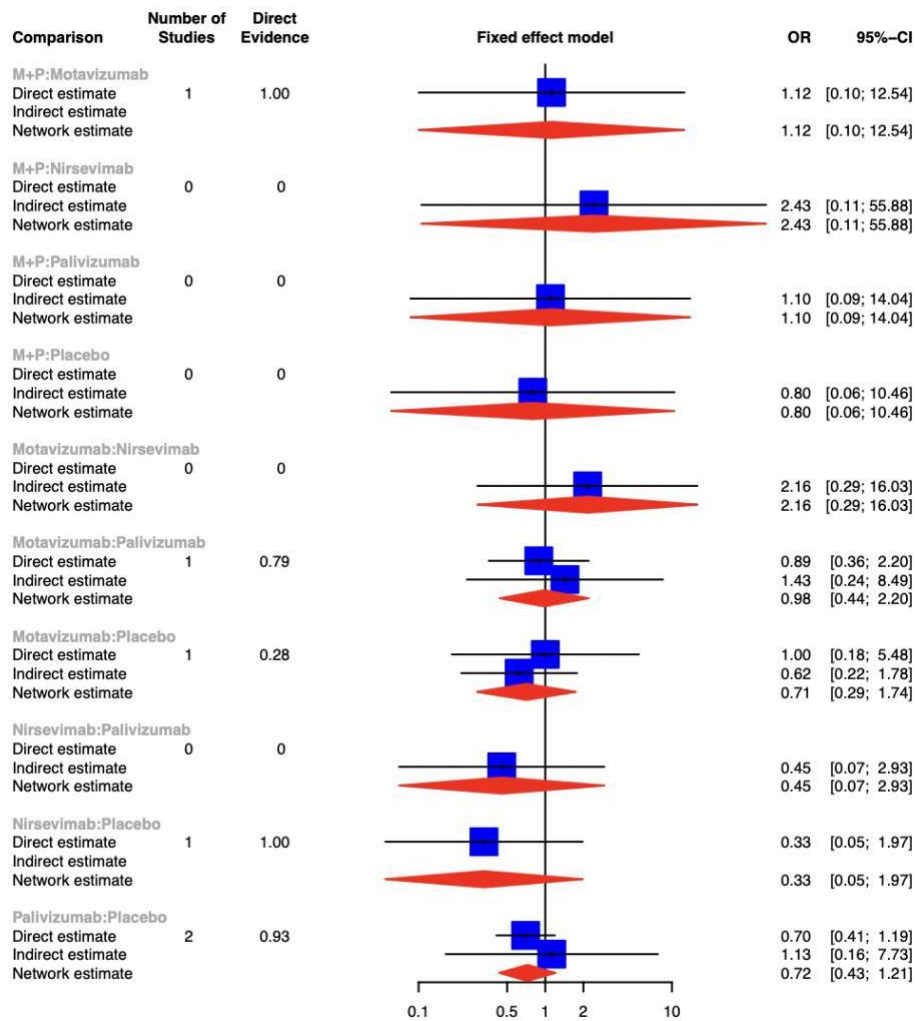

Appendix figure S46: node-split plot of all-cause mortality in fixed effects model

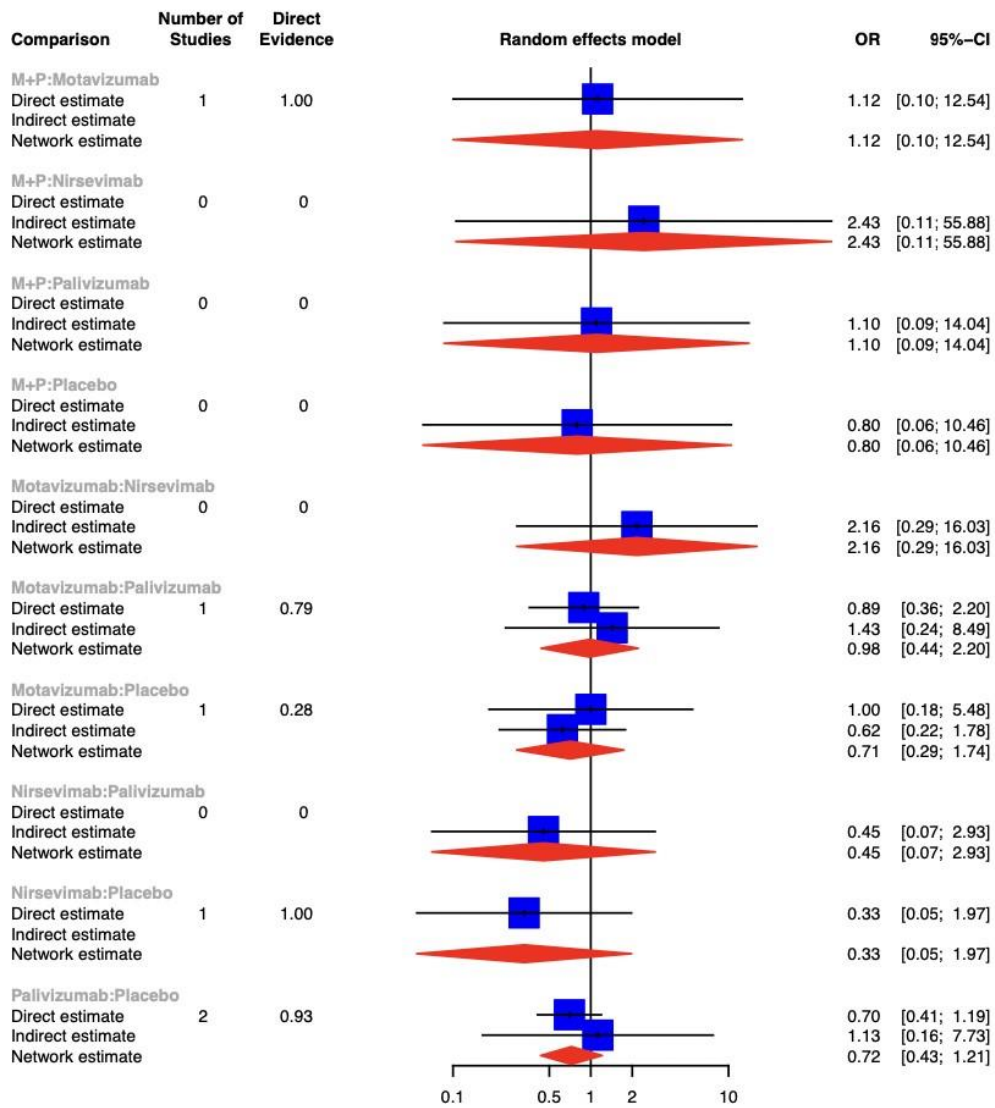

Appendix figure S47: node-split plot of all-cause mortality in random effects model

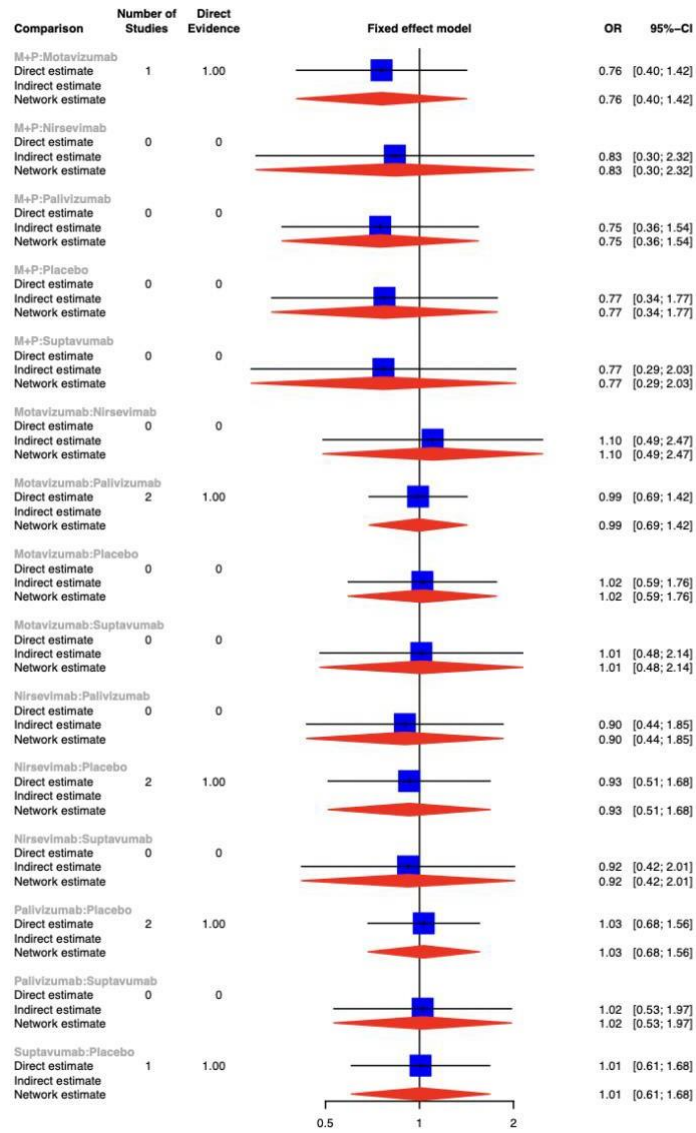

Appendix figure S48: node-split plot of drug-related adverse events in fixed effects model

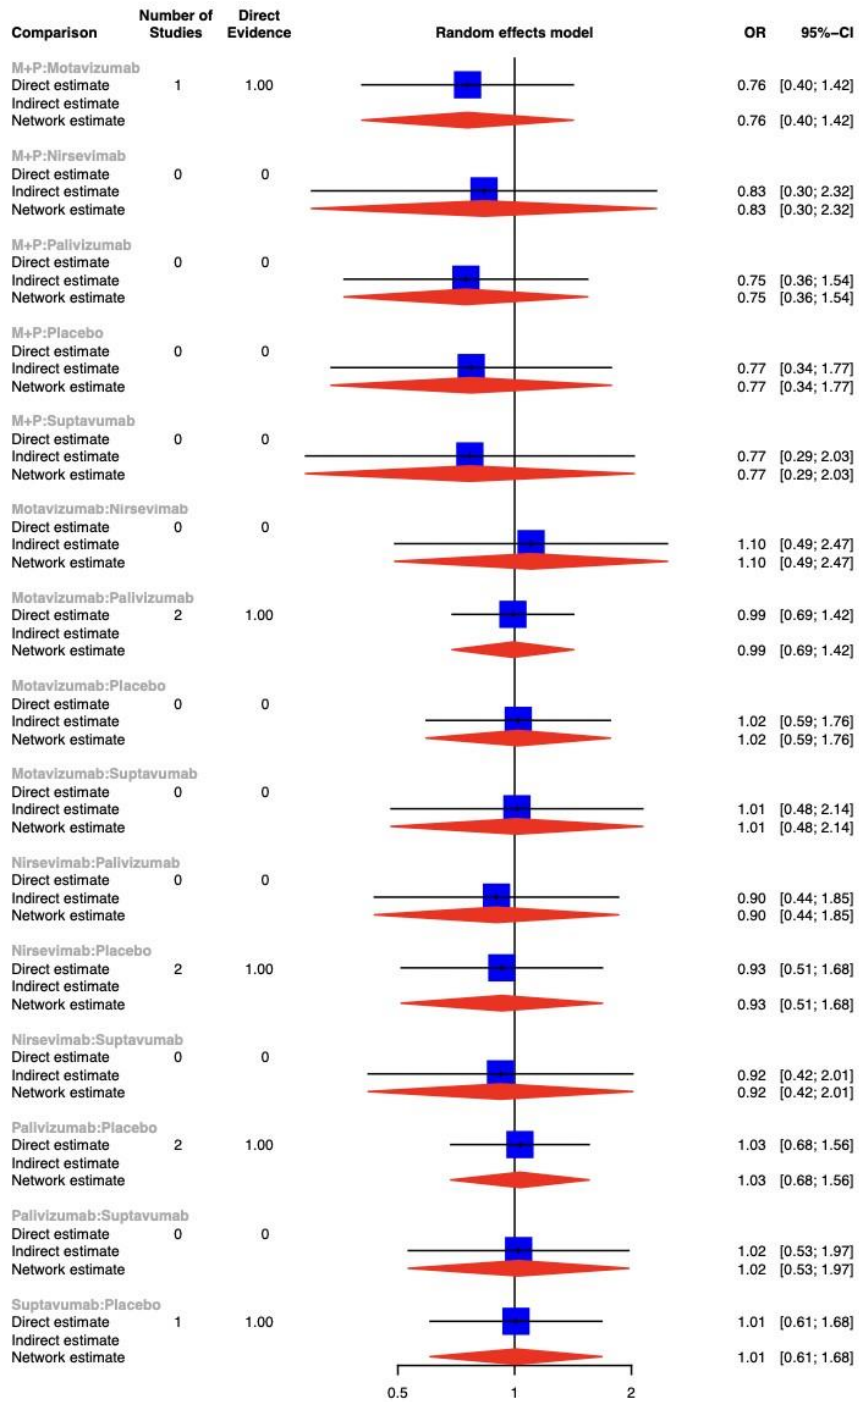

Appendix figure S49: node-split plot of drug-related adverse events in random effects model

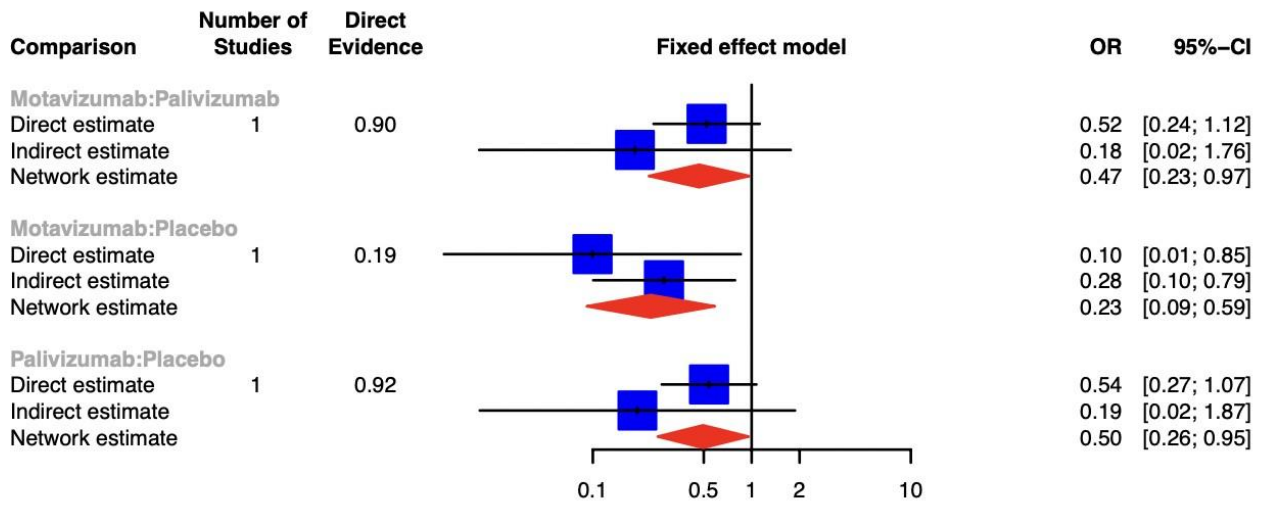

Appendix figure S50: node-split plot of rate of ICU admission in fixed effects model

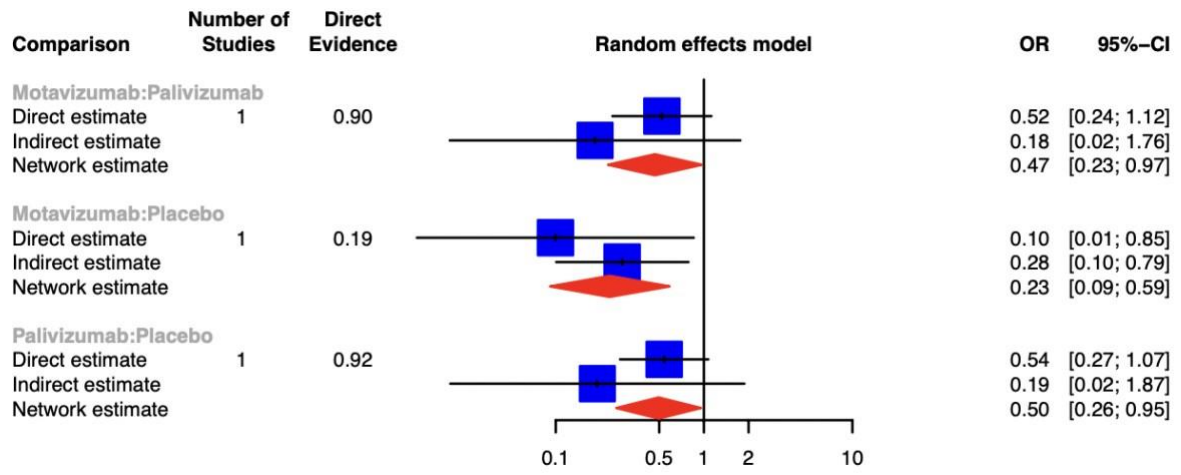

Appendix figure S51: node-split plot of rate of ICU admission in random effects model

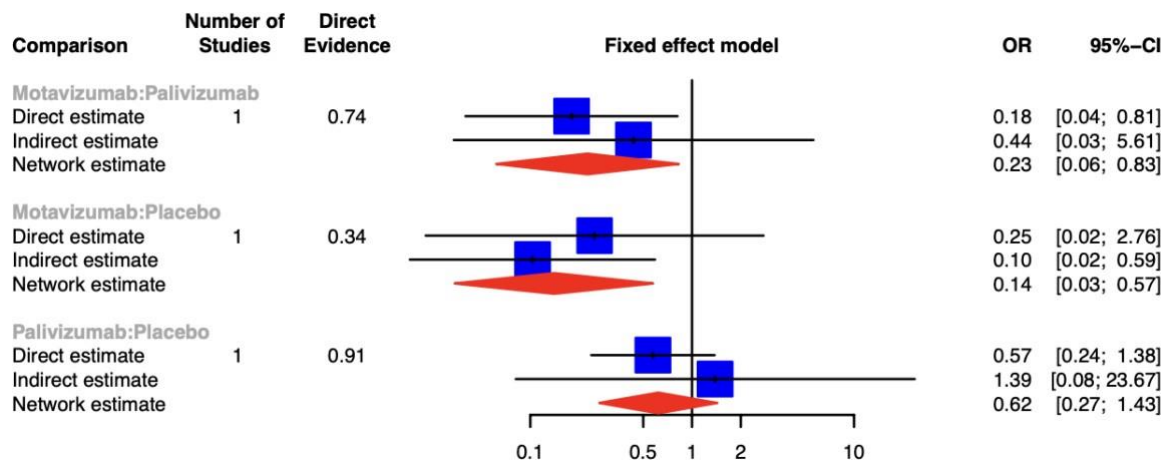

Appendix figure S52: node-split plot of rate of mechanical ventilation use in fixed effects model



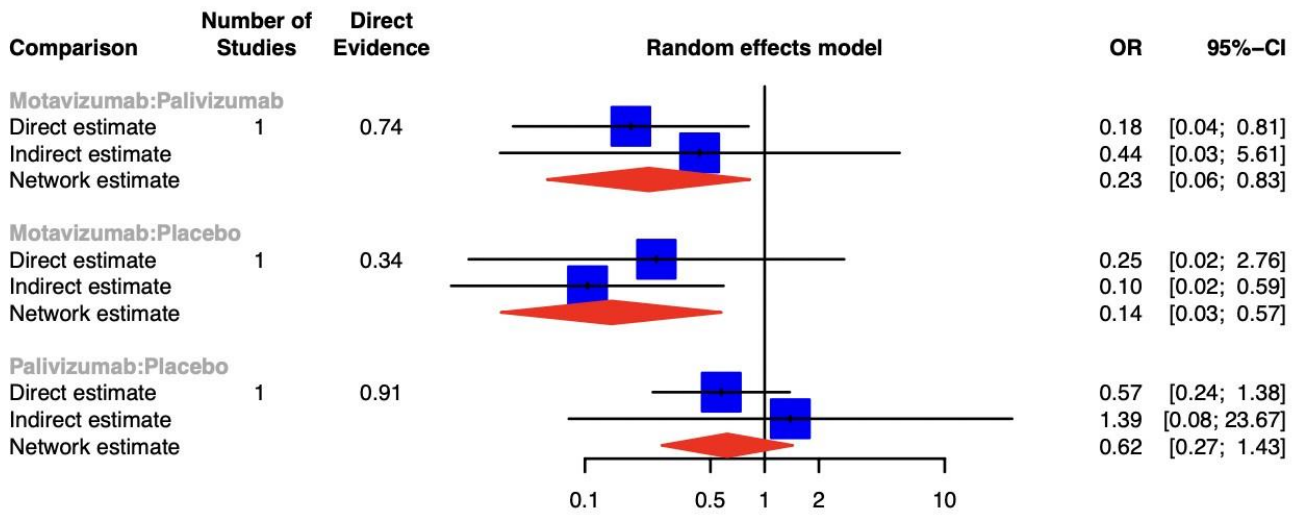

Appendix figure S53: node-split plot of rate of mechanical ventilation use in random effects model

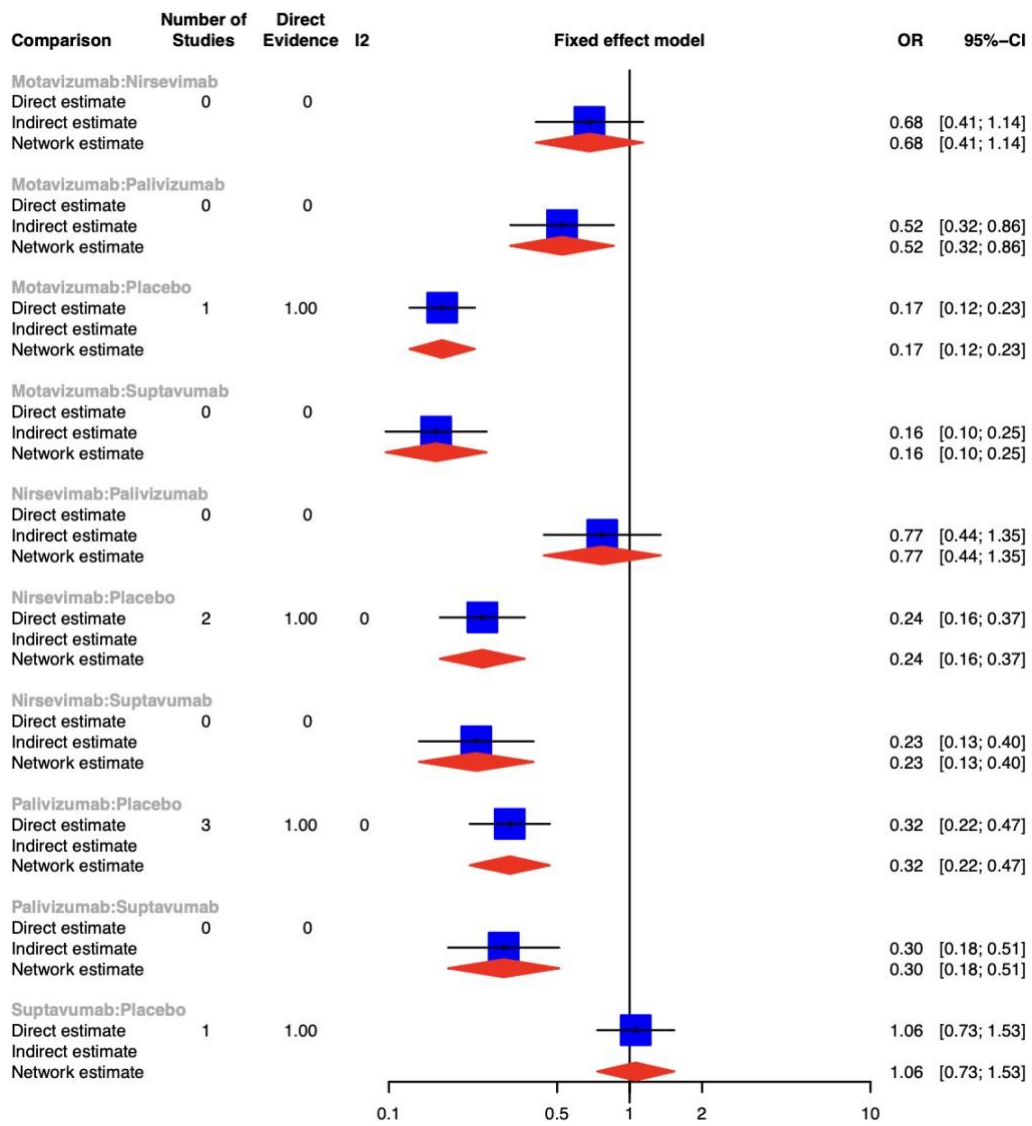

Appendix figure S54: node-split plot of rate of RSV infection in fixed effects model

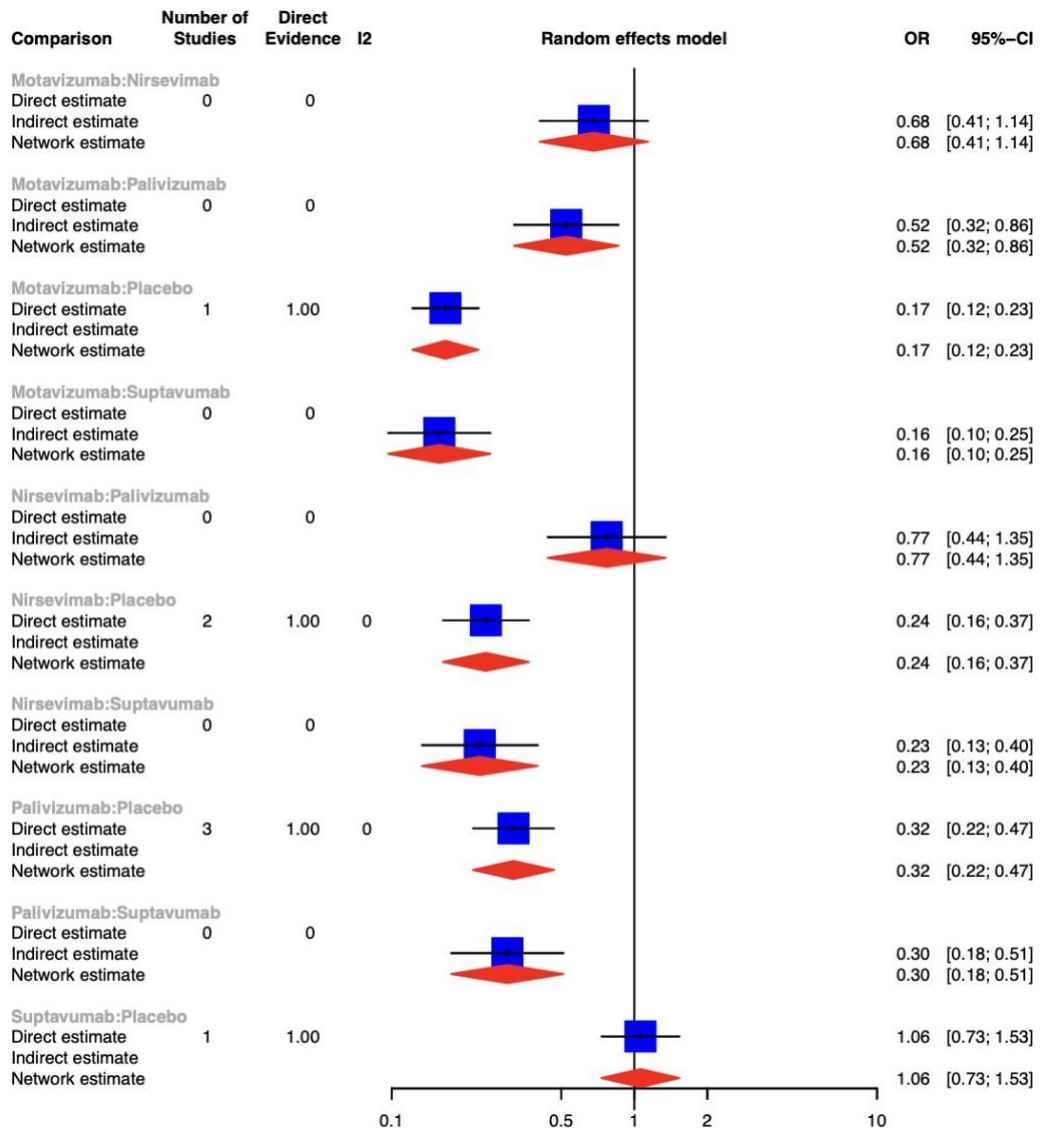

Appendix figure S55: node-split plot of rate of RSV infection in random effects model

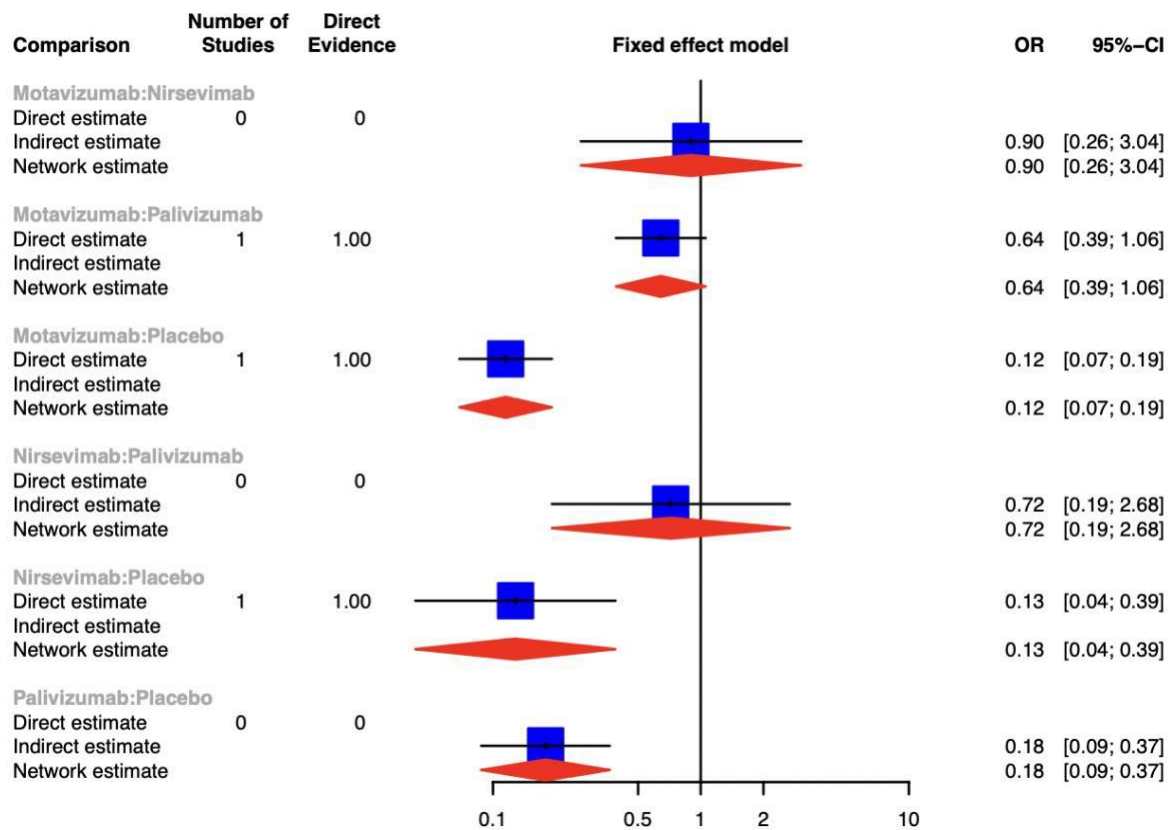

Appendix figure S56: node-split plot of rate of supplemental oxygen use in fixed effects model

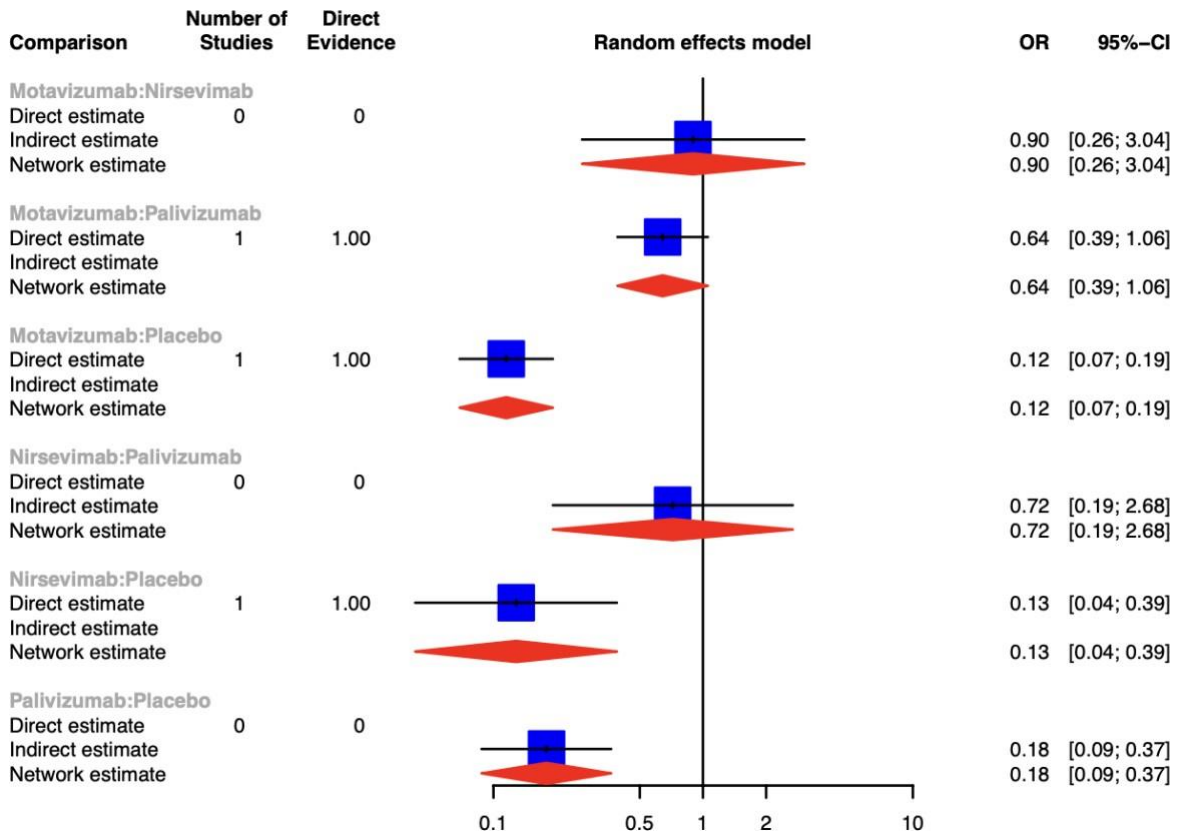

Appendix figure S57: node-split plot of rate of supplemental oxygen use in random effects model

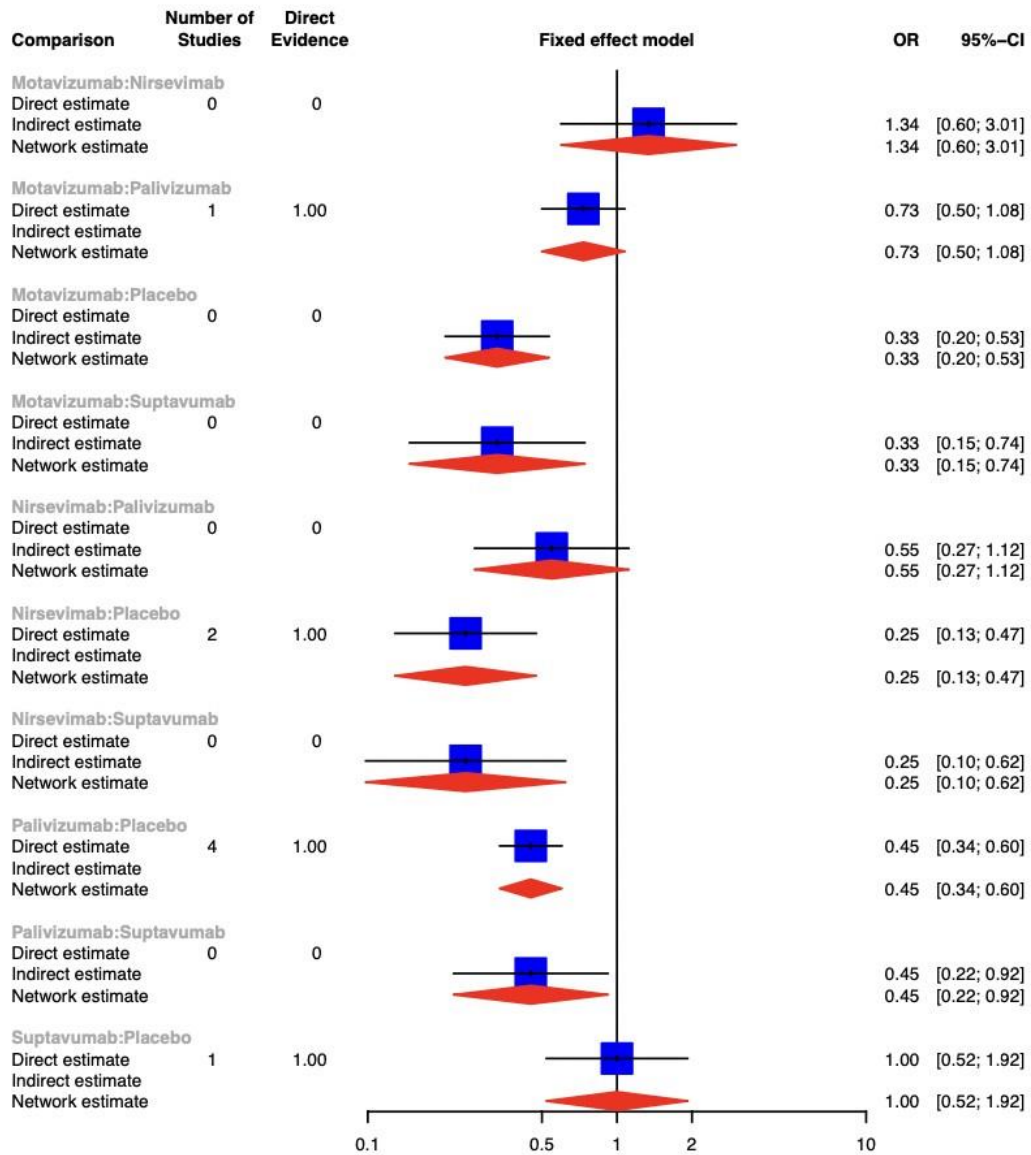

Appendix figure S58: node-split plot of RSV-related hospitalization in fixed effects model

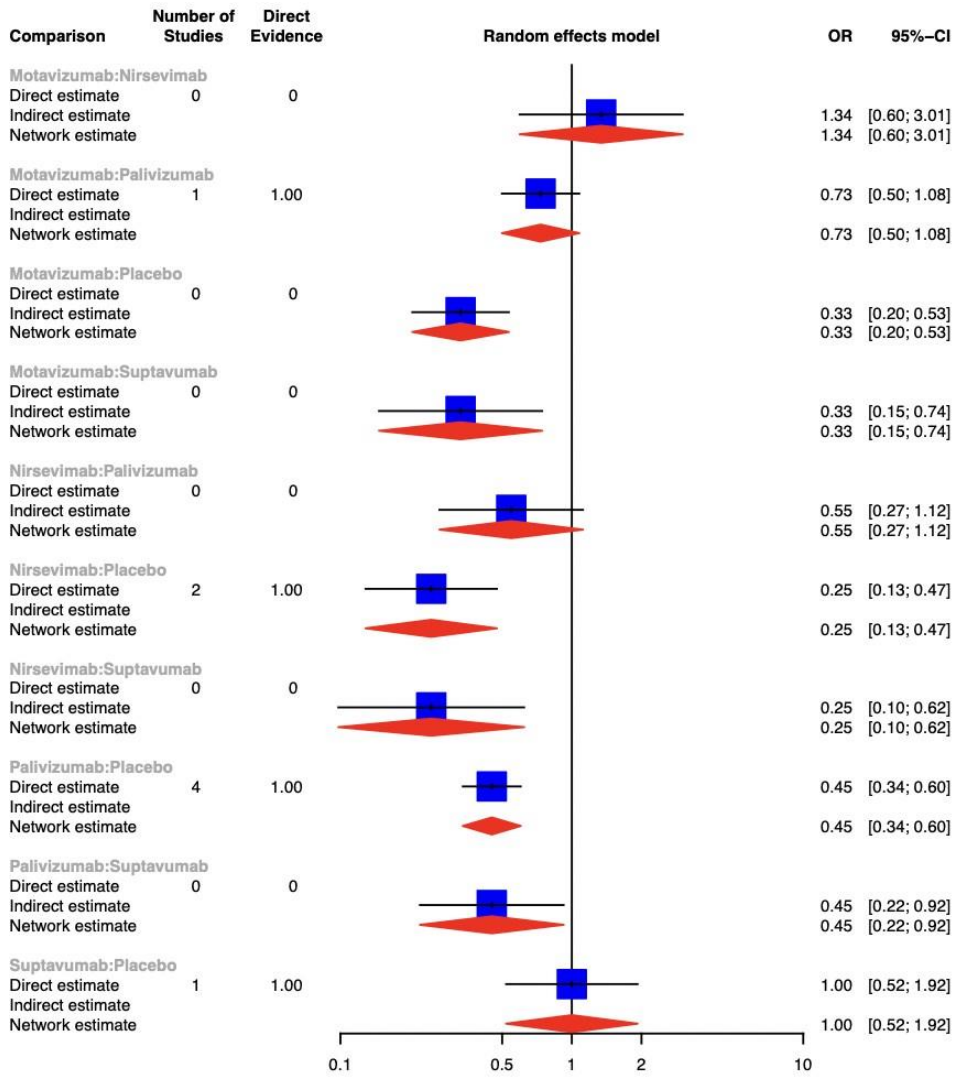

Appendix figure S59: node-split plot of RSV-related hospitalization in random effects model

**Appendix figure S60-S66: contribute plots**

The contribution matrix shows how much each direct treatment effect contributes to each treatment effect estimate from network meta-analysis. The rows represent network treatment effects and columns represent the contribution of direct treatment effects.

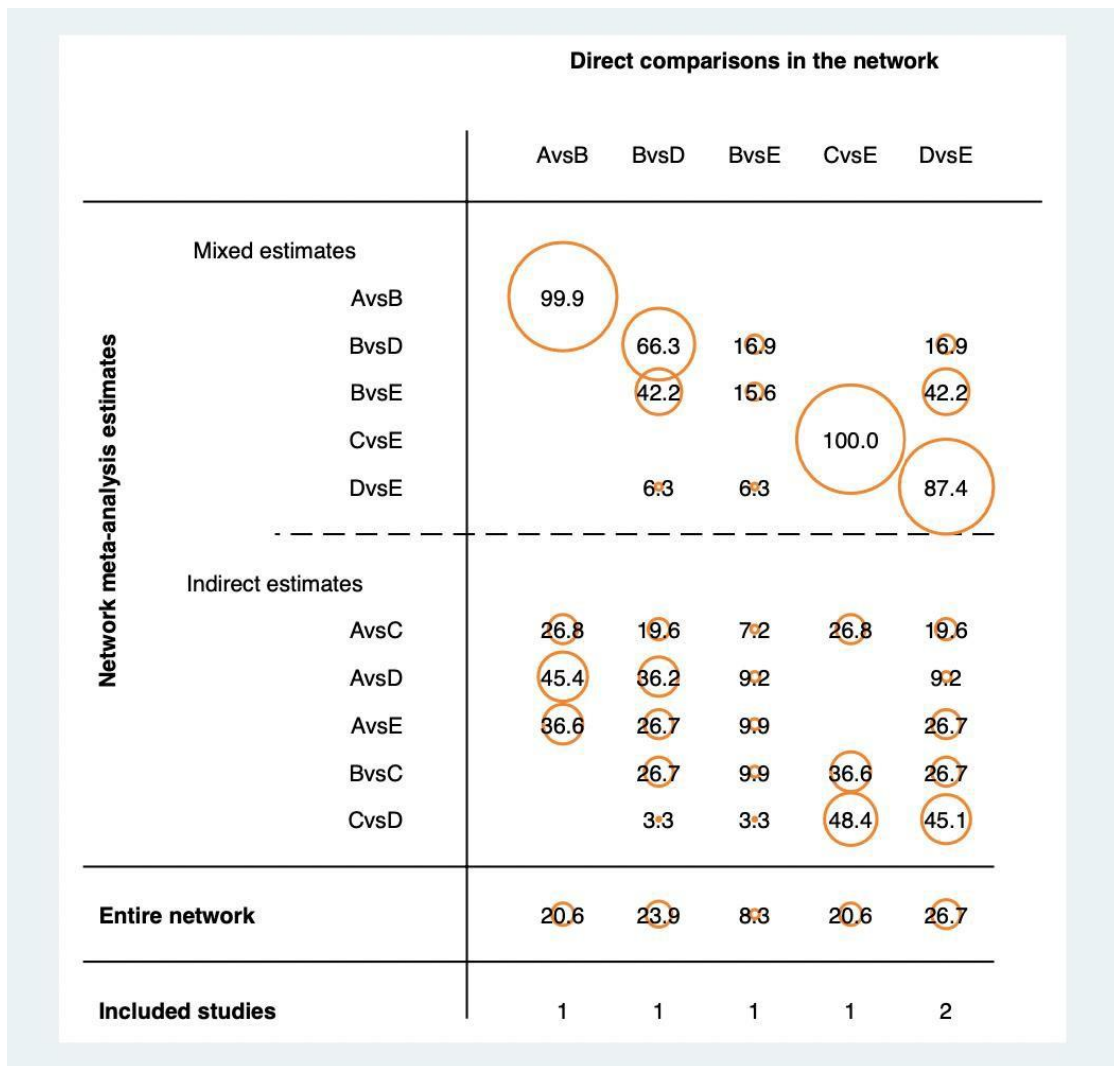

**Appendix figure S60: contribute plot of all-cause mortality** A: M+P; B: Motavizumab; C: Nirsevimab; D: Palivizumab; E:

Placebo



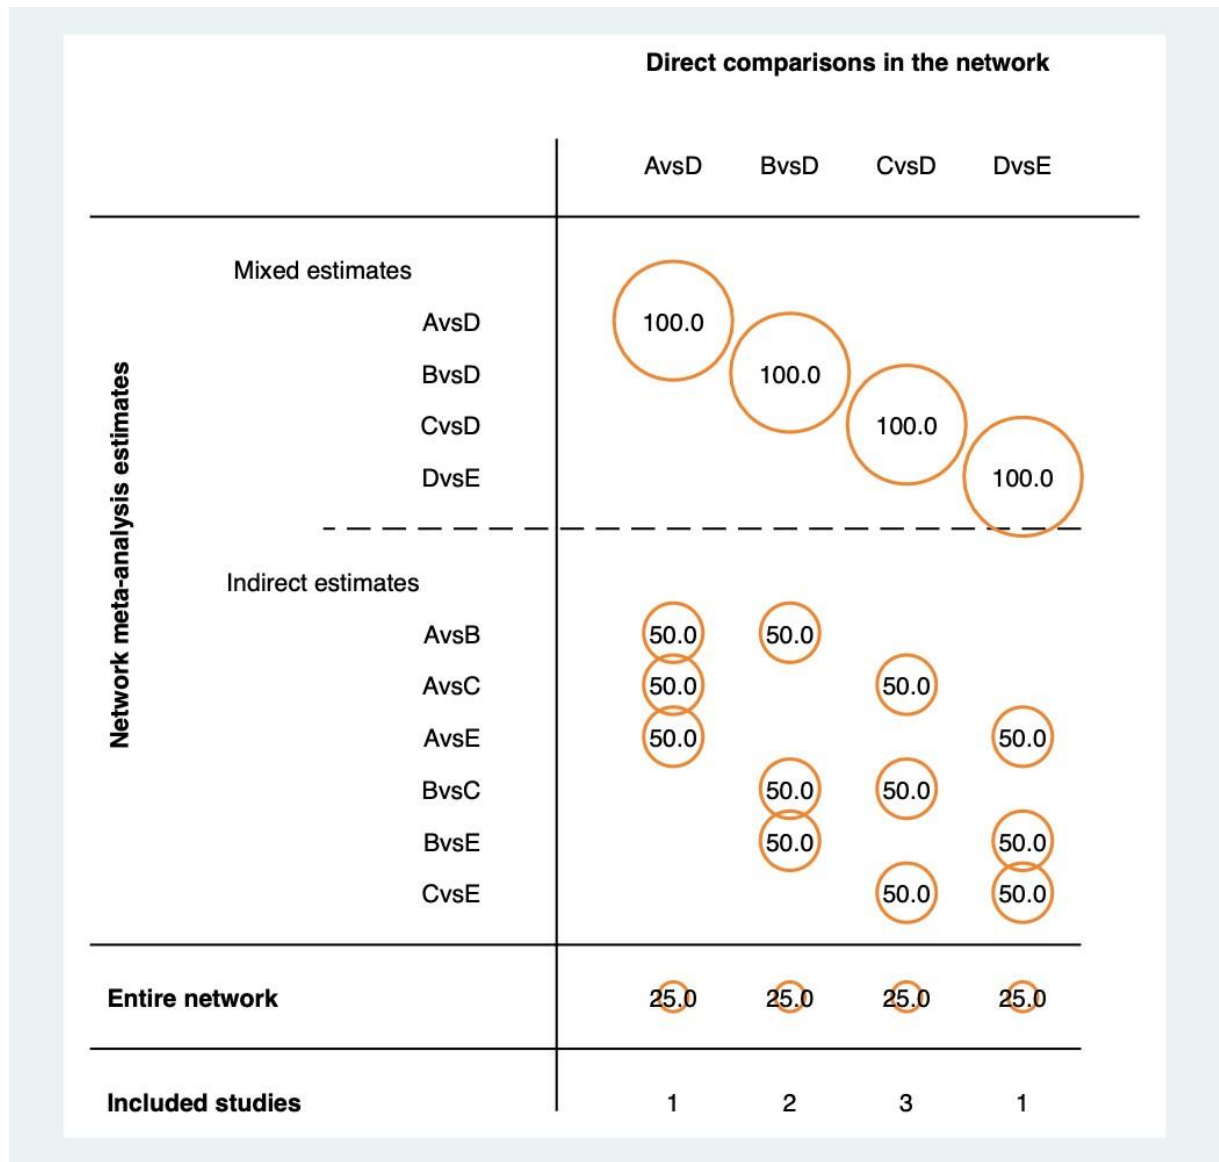

**Appendix figure S61: contribute plot of rate of RSV infection** A: Motavizumab; B: Nirsevimab; C: Palivizumab; D: Placebo;

E: Suptavumab

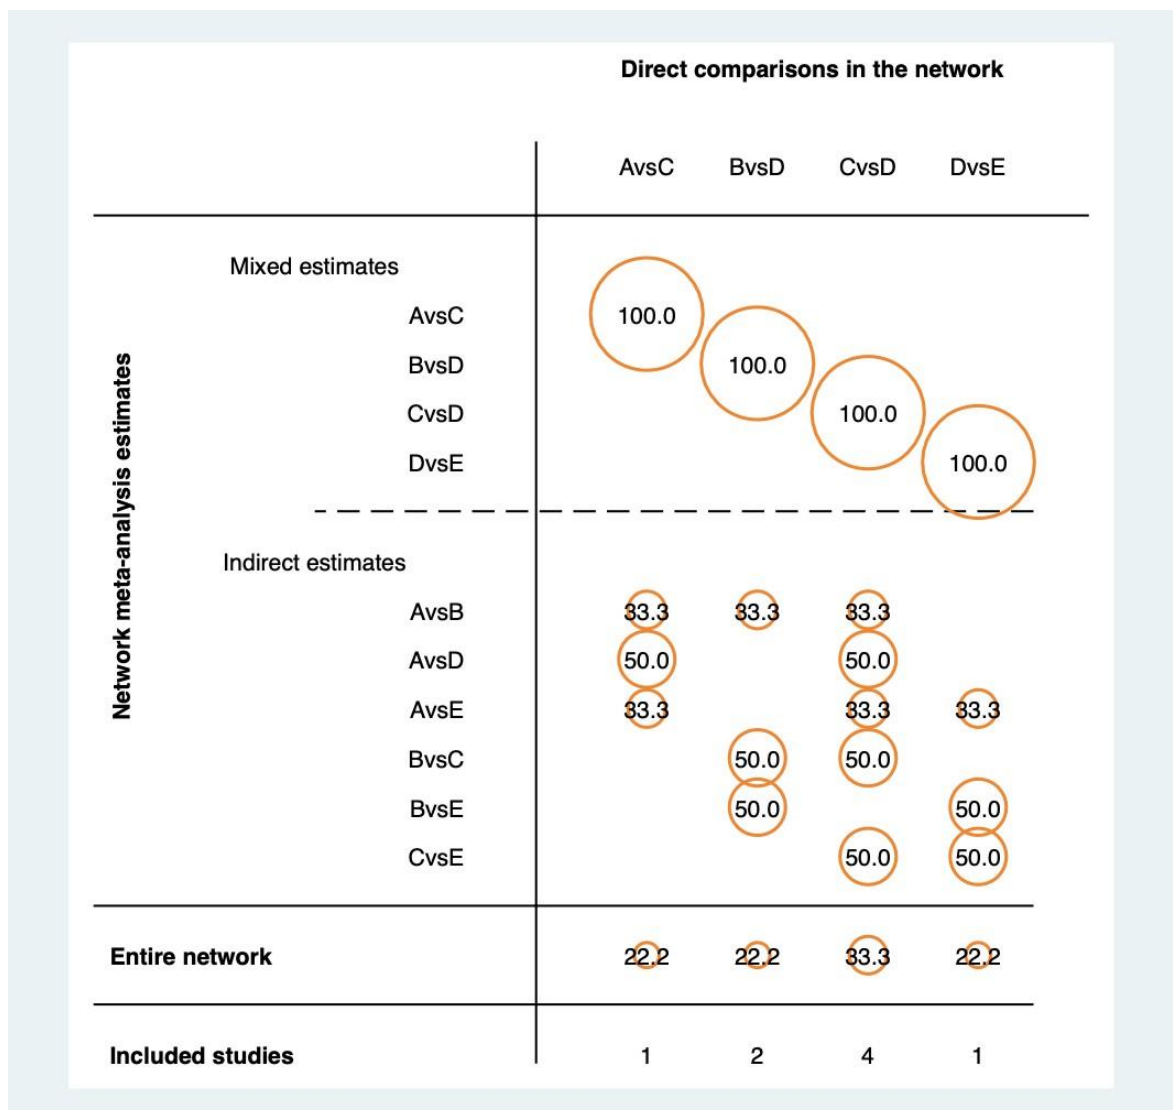

**Appendix figure S62: contribute plot of RSV-related hospitalization** A: Motavizumab; B: Nirsevimab; C: Palivizumab; D: Placebo; E: Suptavumab

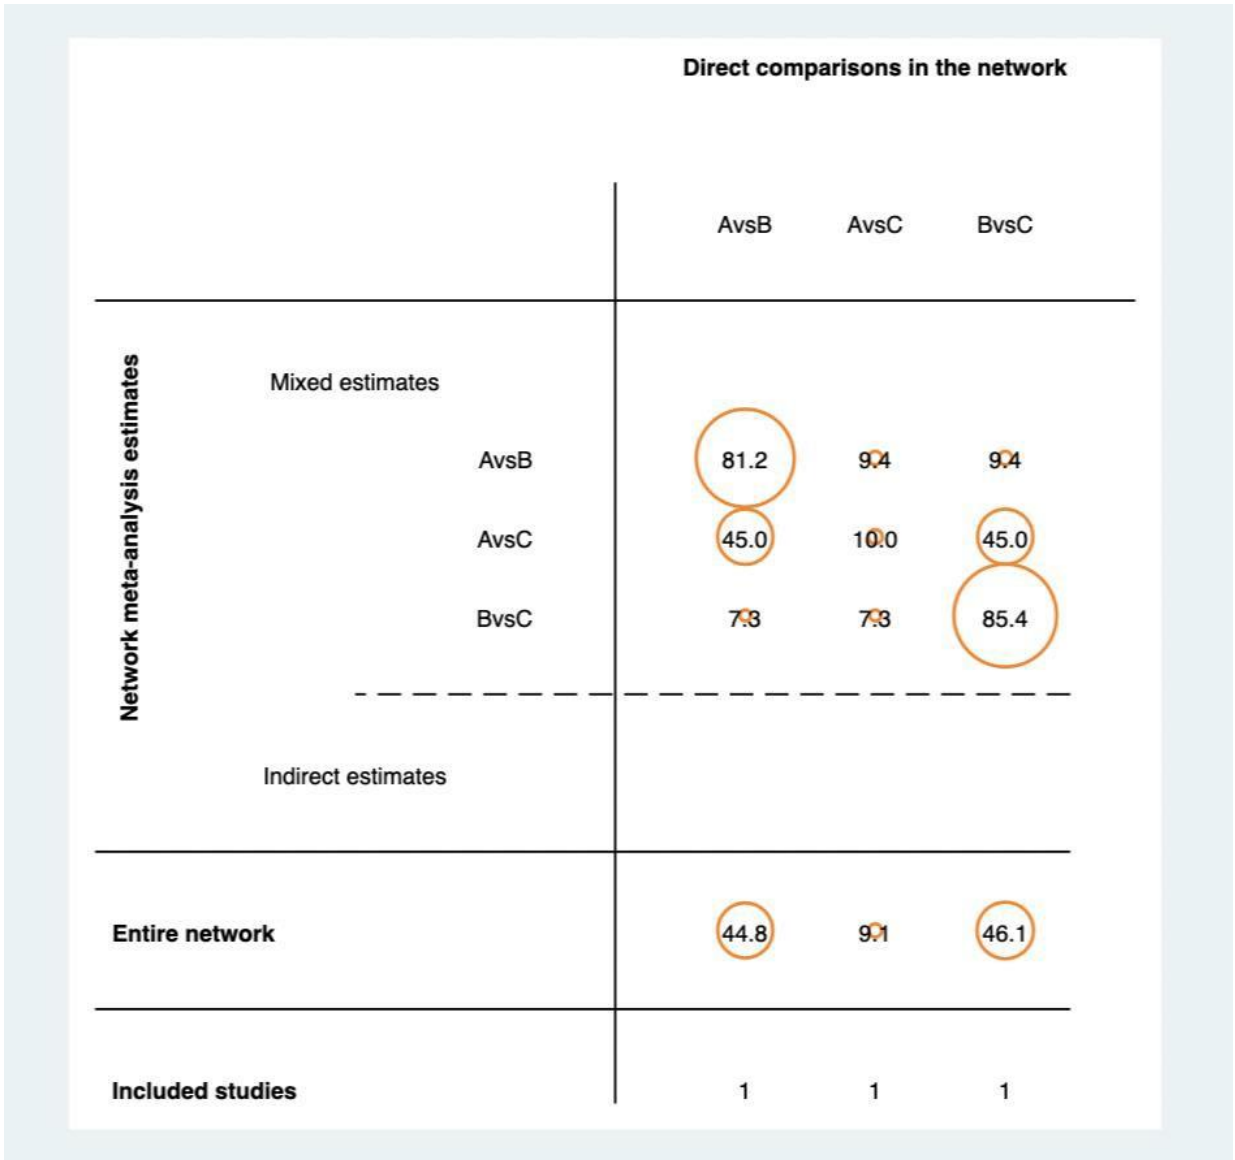

**Appendix figure S63: contribute plot of rate of ICU admission** A: Motavizumab; B: Palivizumab; C: Placebo

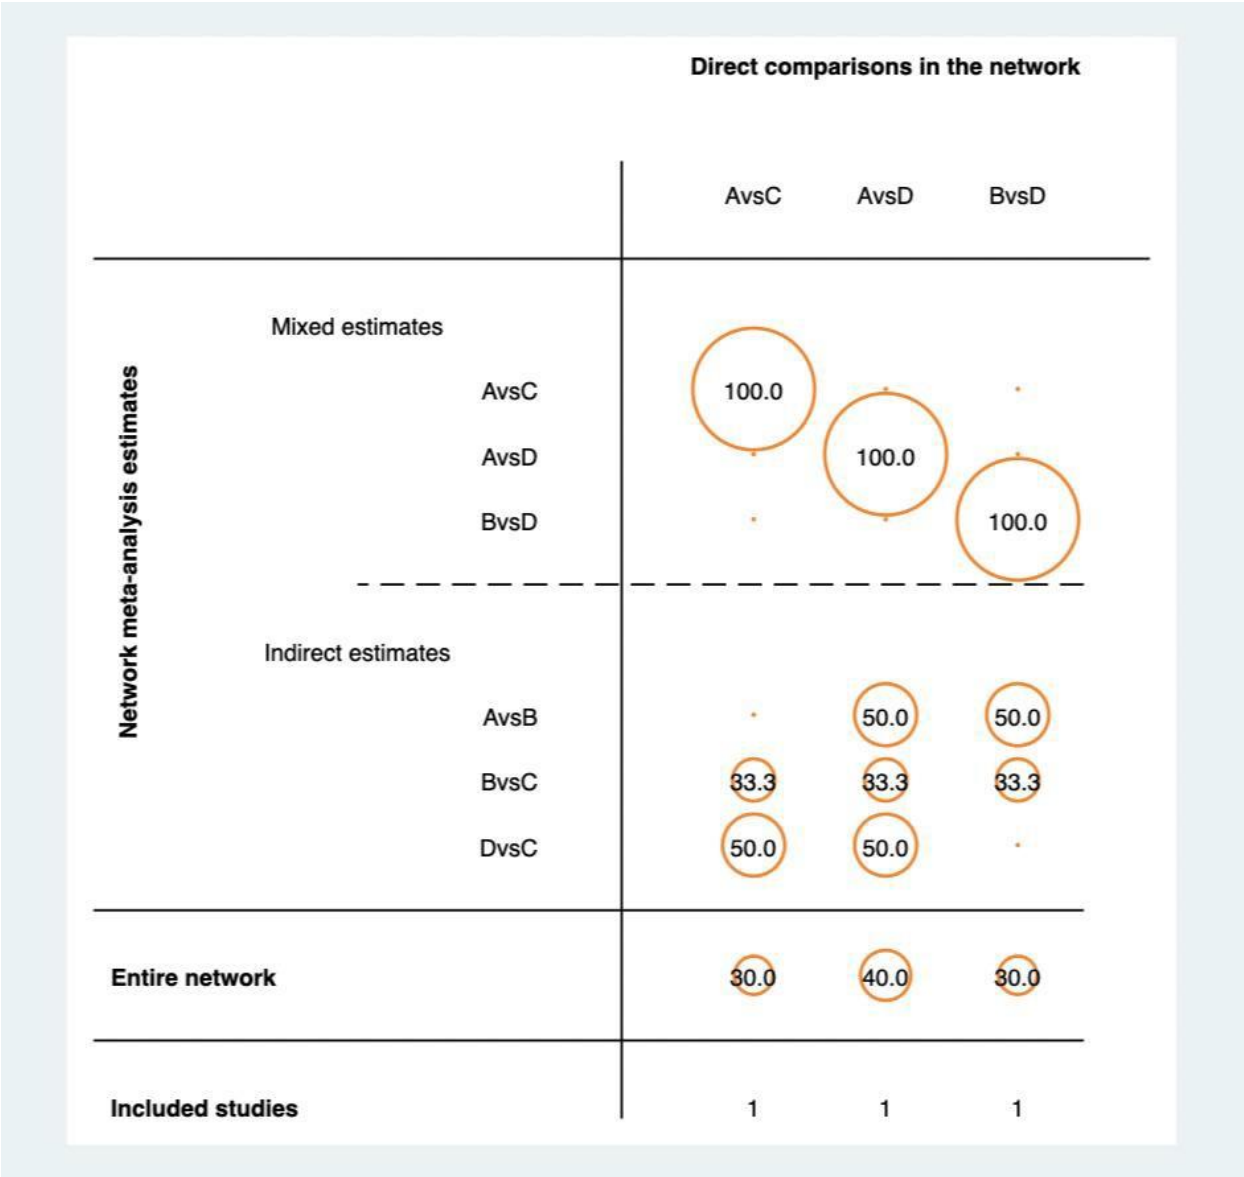

Appendix figure S64: contribute plot of rate of supplemental oxygen use A: Motavizumab; B: Nirsevimab; C: Palivizumab;

D: Placebo

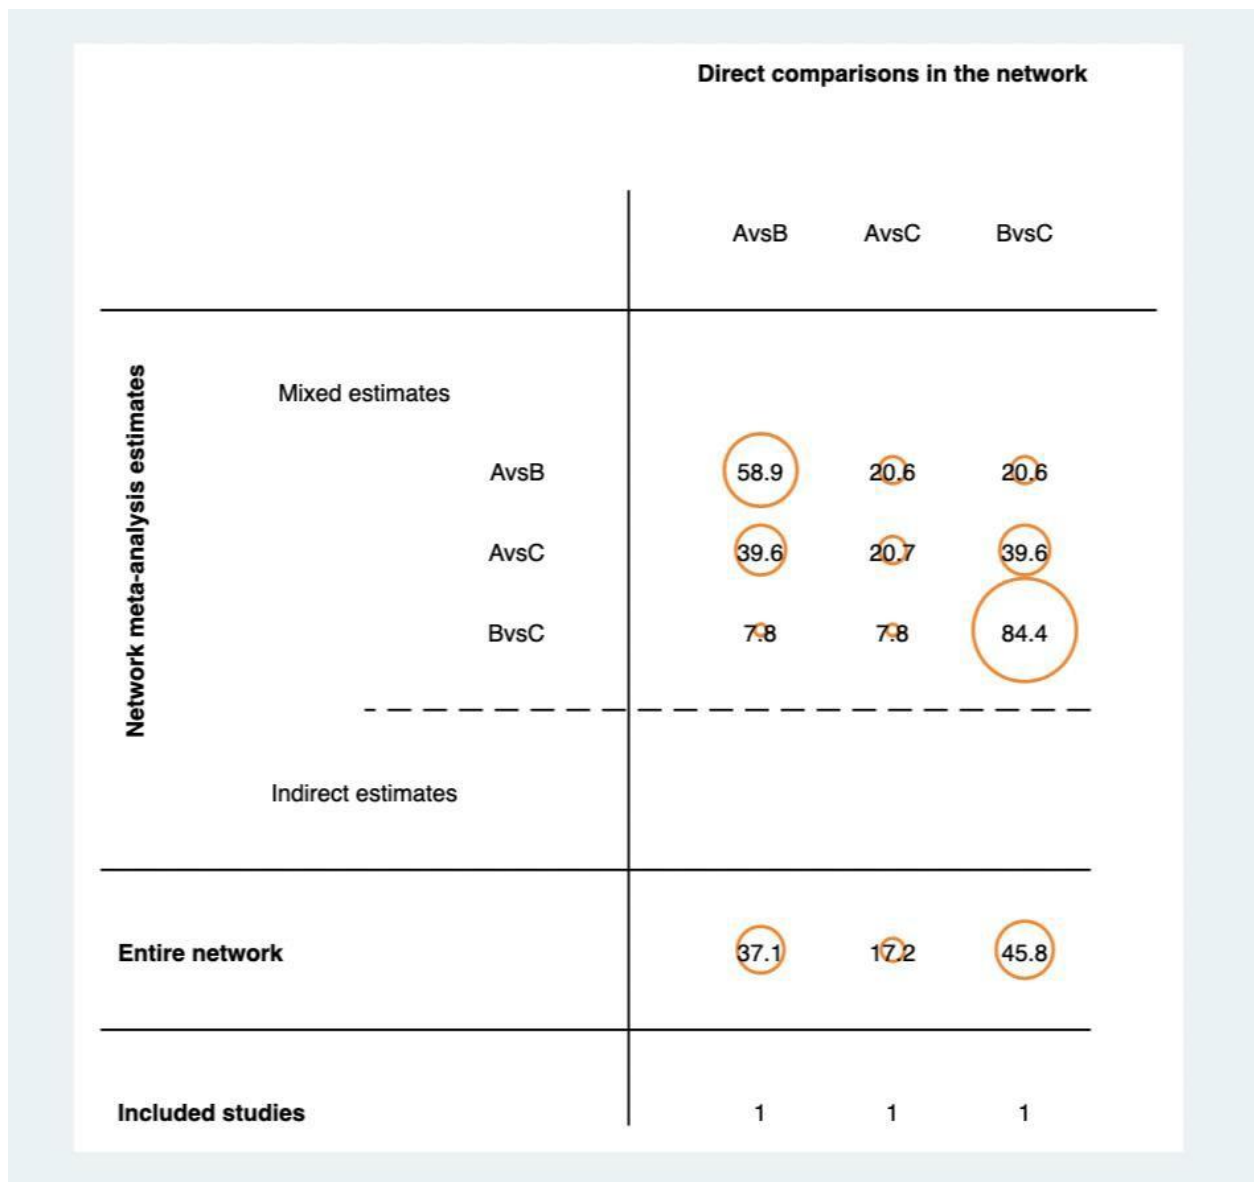

Appendix figure S65: contribute plot of rate of mechanical ventilation use A: Motavizumab; B: Palivizumab; C: Placebo

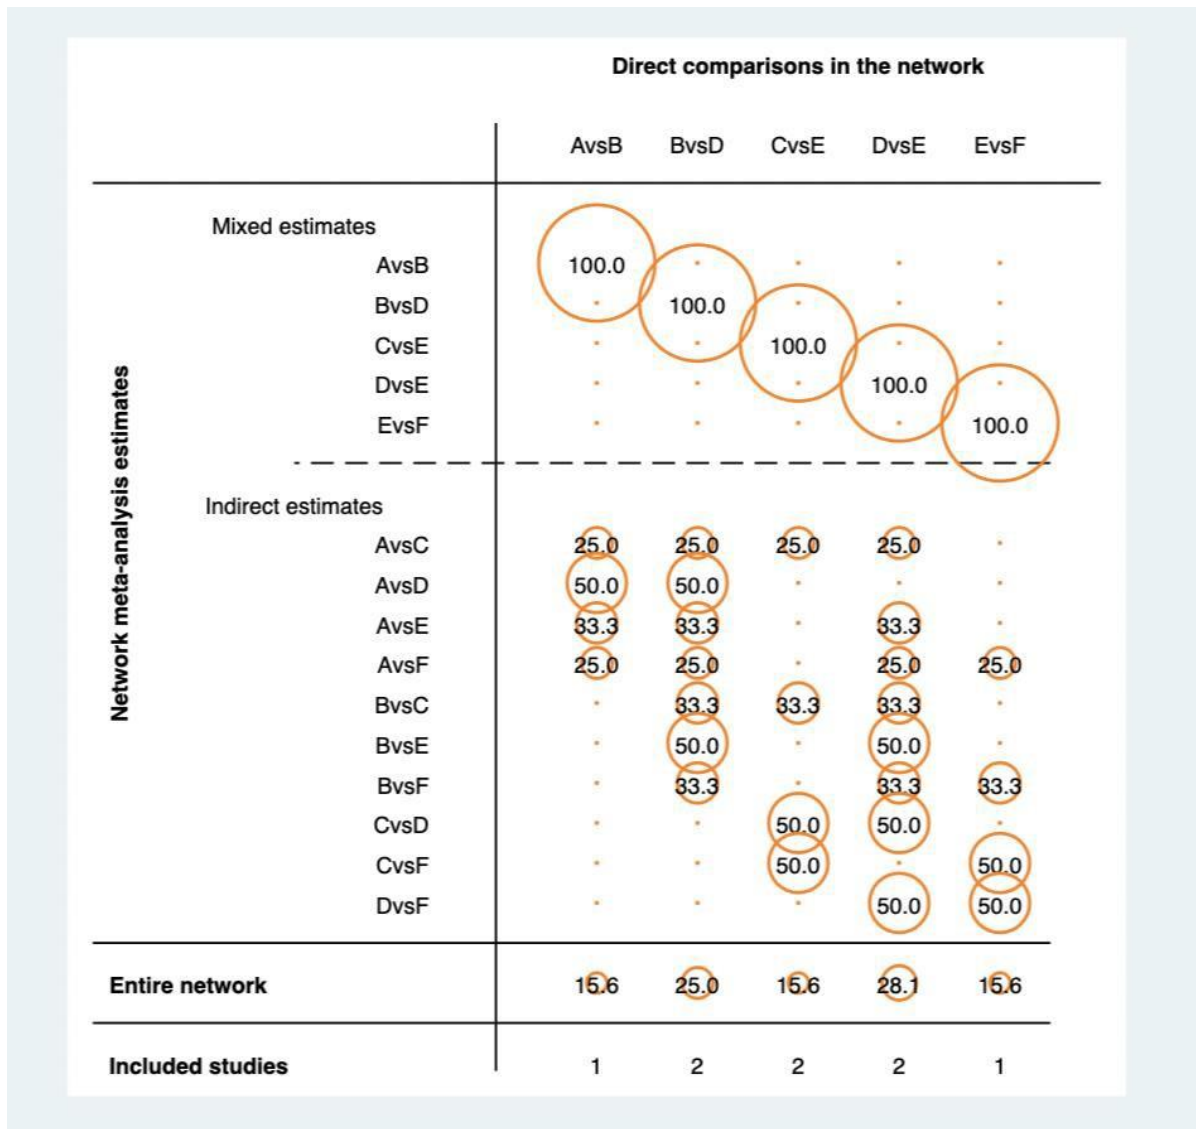

**Appendix figure S66: contribute plot of drug-related adverse events A: M+P; B: Motavizumab; C: Nirsevimab; D: Palivizumab; E: Placebo; F: Suptavumab**

Appendix figure S67-S68: subgroup analysis

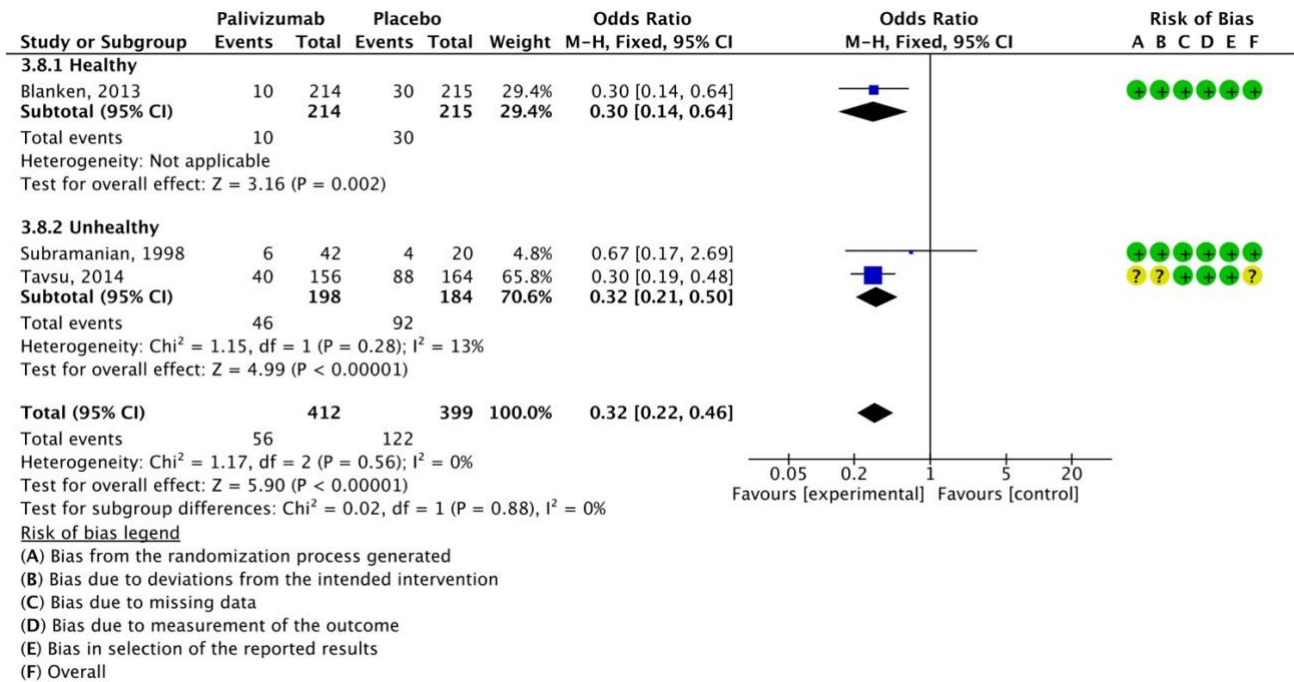

Appendix figure S67: subgroup analysis of rate of RSV infection

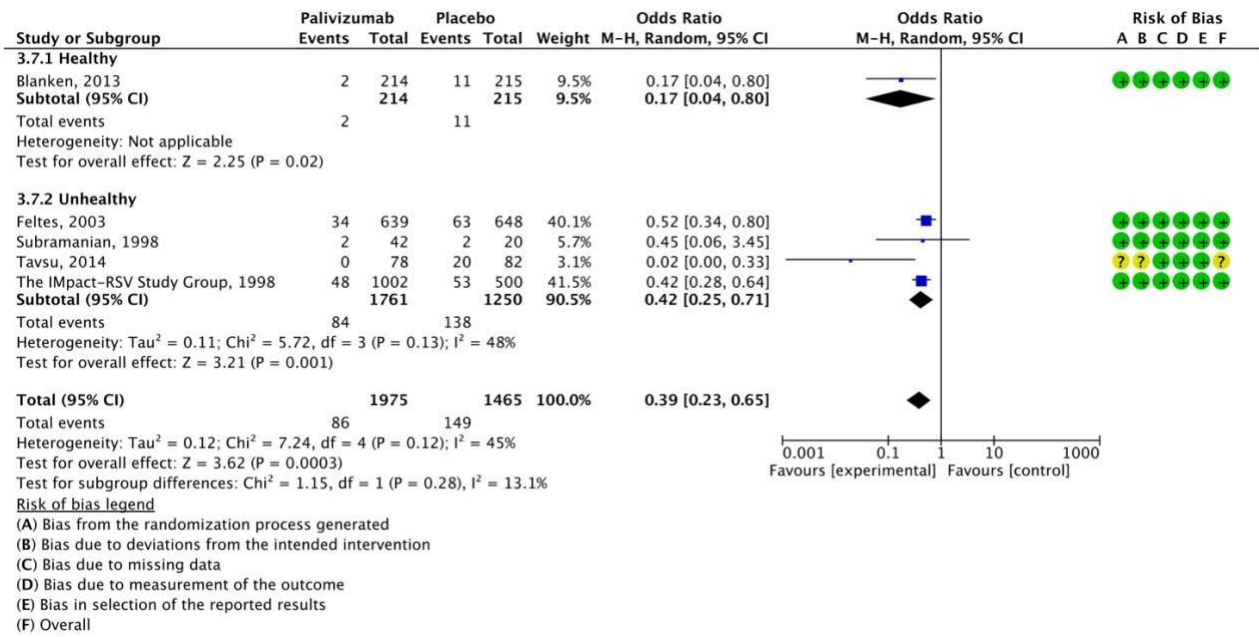

Appendix figure S68: subgroup analysis of RSV-related hospitalization



Appendix figure S69-S71: plots of meta-regression

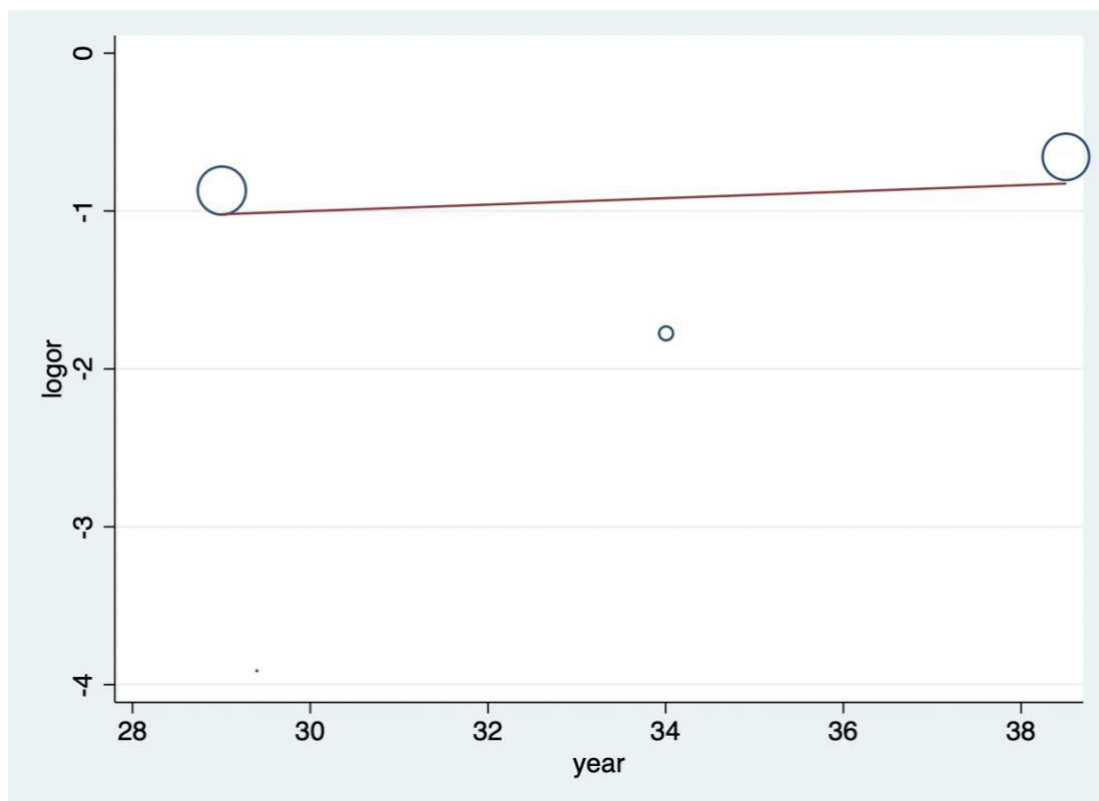

Appendix figure S69: meta-regression of age in RSV-related hospitalization

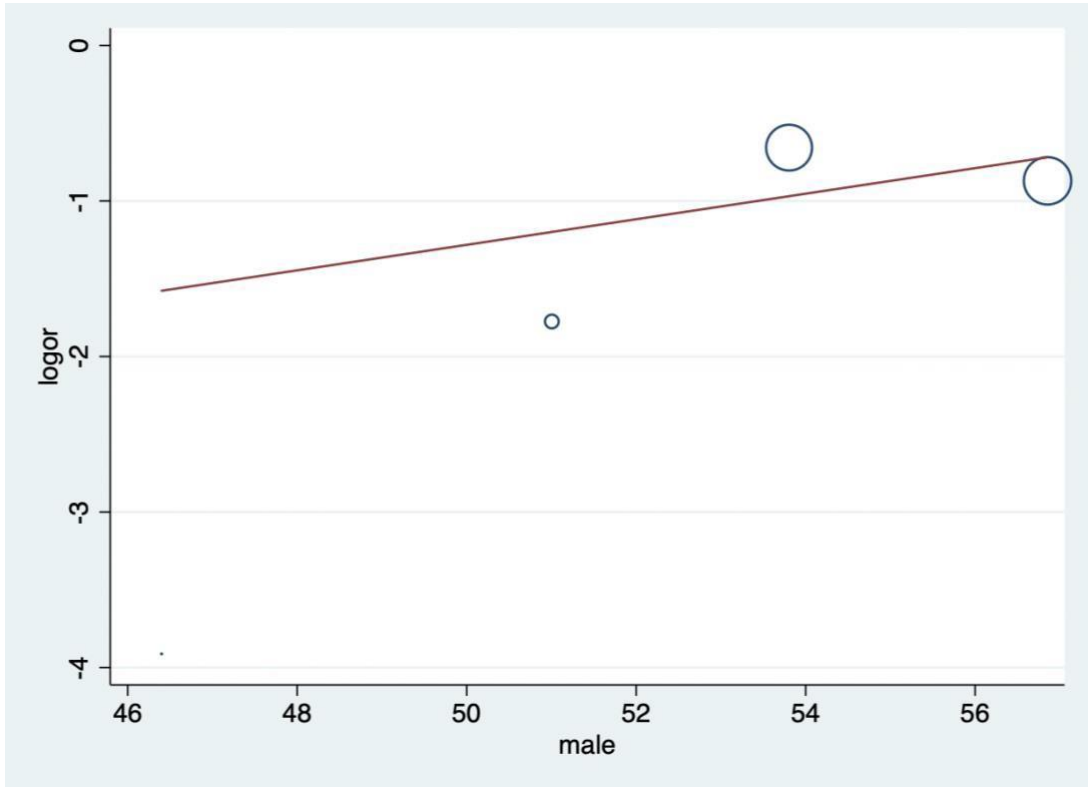

Appendix figure S70: meta-regression of gender in RSV-related hospitalization

Treatment effect vs. covariate

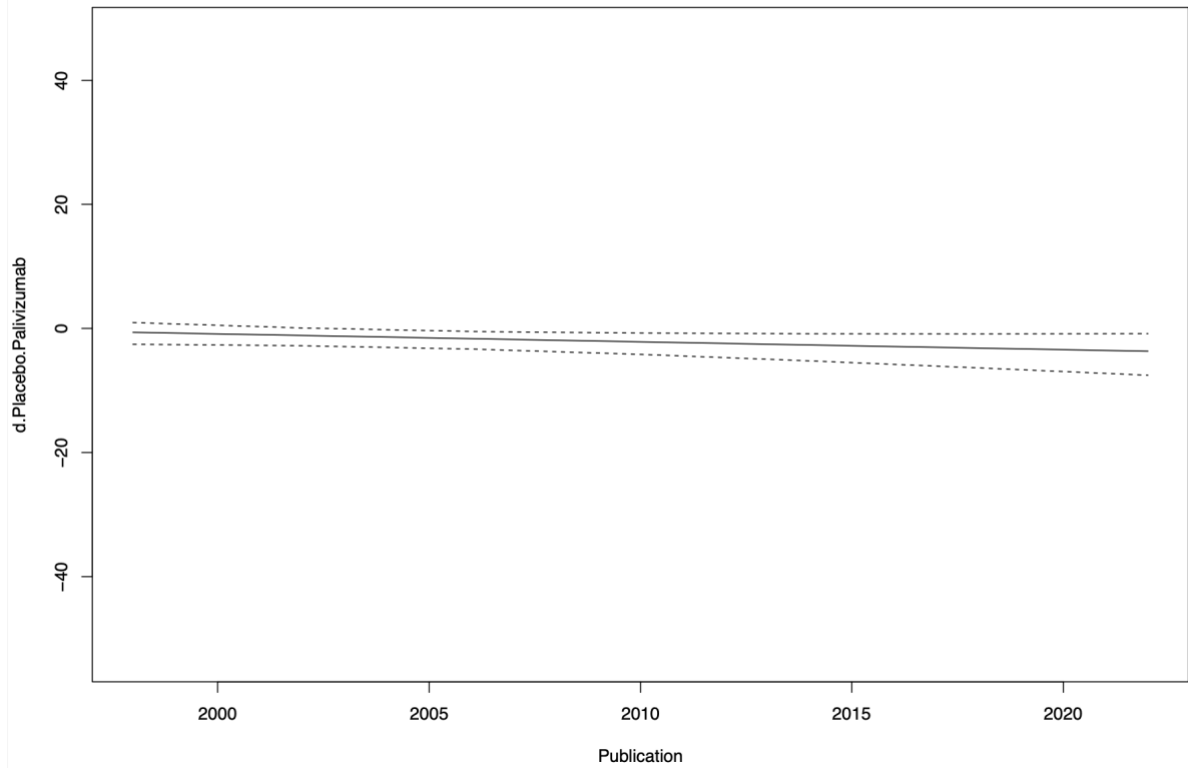

Appendix figure S71: meta-regression of publication year in RSV-related hospitalization

Appendix figure S72: Comparison of different monoclonal antibodies on efficacy and safety outcomes

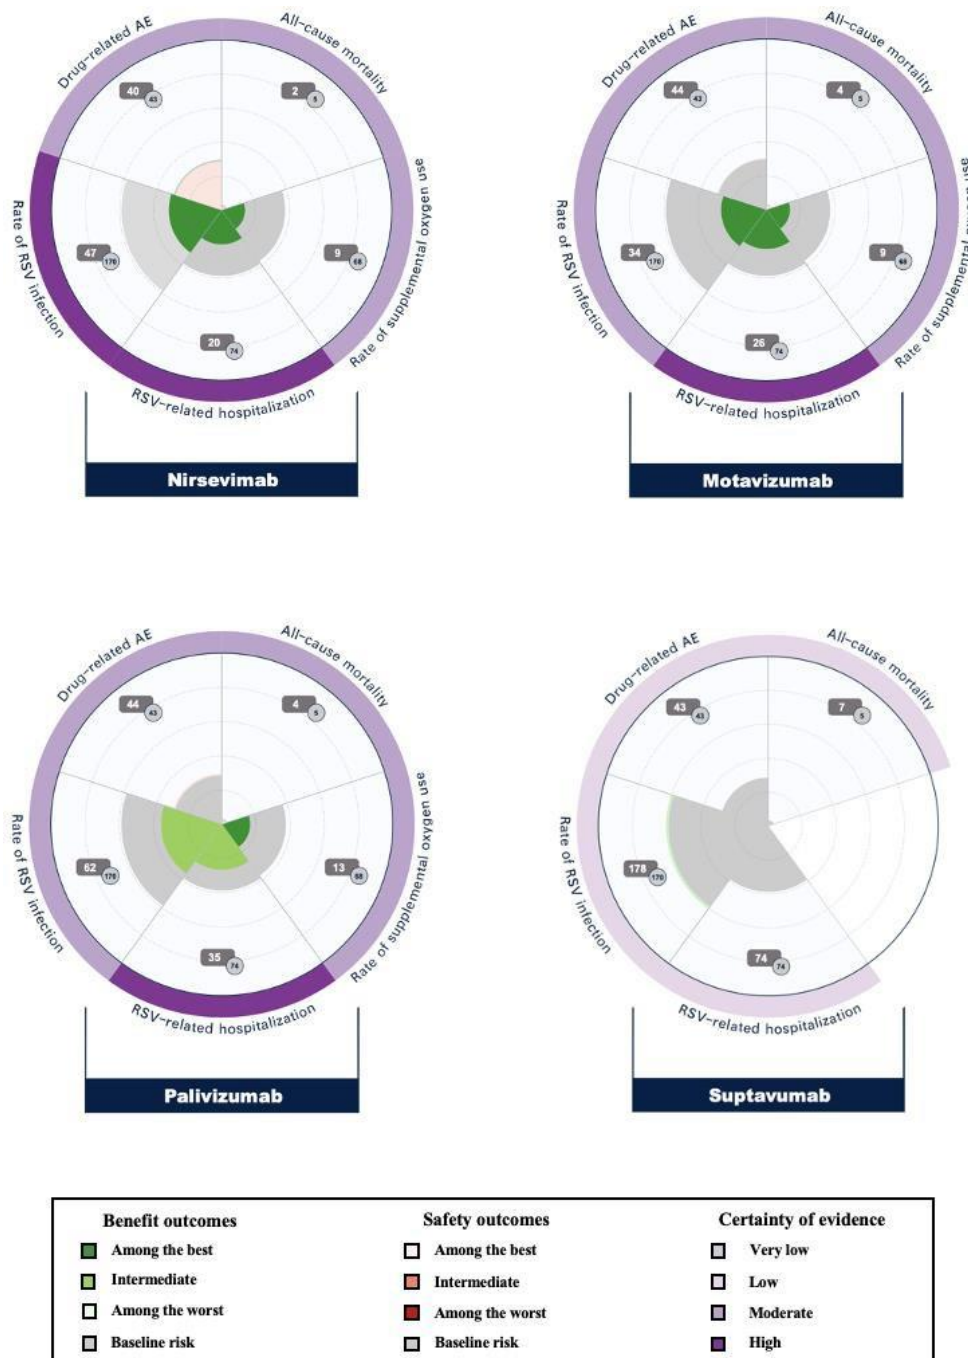

\*The numbers in the circles (light gray) represent the baseline risk, the numbers in the boxes represent the absolute risk of the outcome after using the intervention. For example, the baseline risk of RSV infection was 170 per 1000 participants (light gray), after using nirsevimab, the absolute risk was reduced to 47 per 1000 participants (dark green), which indicates that nirsevimab was the best of the four drugs.

\*AE: adverse events.
