# Supplementary material for: Monoclonal Antibody for the Prevention of Respiratory Syncytial Virus in Infants and Children: A Systematic Review and Network Meta-analysis
Source: PubMed Central journal article supplement (PMC9938429; doi:10.1001/jamanetworkopen.2023.0023), 2023-02-17
Supplement: jamanetwopen-e230023-s002.pdf [file jamanetwopen-e230023-s002.pdf]

## Data Sharing Statement

Sun. Monoclonal Antibody for the Prevention of Respiratory Syncytial Virus in Infants and Children. *JAMA Netw Open*. Published February 17, 2023.  
doi:10.1001/jamanetworkopen.2023.0023

### Data

**Data available:** No
